# Supplementary material for: Protodefluorinated Selectfluor® heteroaggregate photoinduces direct C(sp3)–H fluorinations without photocatalyst
Source: Royal Society of Chemistry journal article supplement (doi:10.1039/d5qo00149h), 2025-01-01
Supplement: d5qo00149h1.pdf [file d5qo00149h1.pdf]

# Supporting Information File

## A Protodefluorinated Selectfluor<sup>®</sup> Heteroaggregate Photoinduces Direct C(sp<sup>3</sup>)-H Fluorinations Without Photocatalyst

Shahboz Yakubov,<sup>a</sup> and Joshua P. Barham<sup>a,b\*</sup>

<sup>a</sup>Fakultät für Chemie und Pharmazie, Universität Regensburg, Universitätsstr. 31, 93053 Regensburg, Germany

<sup>b</sup>Department of Pure & Applied Chemistry, University of Strathclyde, 295 Cathedral St., Glasgow G1 1XL, U.K.

\*Corresponding Author. E-mail: [Joshua-Philip.Barham@chemie.uni-regensburg.de](mailto:Joshua-Philip.Barham@chemie.uni-regensburg.de)

### Table of Contents

|     |                                                                              |    |
|-----|------------------------------------------------------------------------------|----|
| 1   | Experimental .....                                                           | 2  |
| 1.1 | General Comments .....                                                       | 2  |
| 2   | Synthesis .....                                                              | 13 |
| 2.1 | Synthesis of Starting Materials .....                                        | 13 |
| 2.2 | Synthesis of Fluorinated products.....                                       | 14 |
| 3   | Mechanistic Studies .....                                                    | 21 |
| 3.1 | Radical Trapping .....                                                       | 21 |
| 3.2 | UV-visible Spectroscopy Studies .....                                        | 22 |
| 3.3 | Luminescence Measurements .....                                              | 23 |
| 4   | <sup>1</sup> H NMR, <sup>13</sup> C NMR and <sup>19</sup> F NMR Spectra..... | 32 |
| 5   | X-Ray Crystal Data and Experimental .....                                    | 54 |
| 6   | References.....                                                              | 62 |

## 1 Experimental

### 1.1 General Comments

Unless otherwise specified, all reactions were performed using dried, deoxygenated solvents. Purifications were conducted by column chromatography with silica gel (Macherey Nagel 0.063–0.2 mm) and the solvents were used after receiving without further purification. Syntheses of products were confirmed by comparisons with the literature data where possible, HR-MS and by  $^1\text{H}$  and  $^{19}\text{F}$  NMR spectra. The reactions were followed and pure fractions from column chromatography were detected by TLC using silica gel pre-coated aluminum sheets (Macherey Nagel: Alugram Xtra SIL G UV254 Nr. 818333, thickness 0.2 mm). TLC plates were analyzed under a UV-light (254 nm) and by potassium permanganate stain.

NMR spectra were recorded in  $\text{CDCl}_3$  or  $\text{CD}_3\text{CN}$  on a Bruker Avance 400 (400 MHz for  $^1\text{H}$ , 101 MHz for  $^{13}\text{C}$ , 376 MHz for  $^{19}\text{F}$ ). For  $^1\text{H}$ ,  $^{13}\text{C}$  and  $^{19}\text{F}$  chemical shifts are presented in  $\delta$ -scale as ppm (parts per million) with residual chloroform peak (7.26 ppm for  $^1\text{H}$  and 77.00 ppm for  $^{13}\text{C}$ ), residual DMSO peak (2.54 ppm for  $^1\text{H}$  and 40.45 ppm for  $^{13}\text{C}$ ), residual acetonitrile peak (1.96 ppm for  $^1\text{H}$  and 118.26 and 1.79 ppm for  $^{13}\text{C}$ ) or residual water peak (4.79 ppm for  $^1\text{H}$ ) as an internal standard. For  $^{19}\text{F}$  NMR, trifluorotoluene was used as the reference (-63.38 ppm), if not stated, no reference is used. NMR yields were calculated based on  $^{19}\text{F}$  NMR using either trifluorotoluene or pentafluorobenzene as an Internal Standard. MestReNova v6.0.2-5475 was used to process NMR spectra. The description of multiplicity that were used is as follows: s = singlet, d = doublet, dd=doublet of doublet, ddd=doublet of doublet of doublet, dm=doublet of multiplet, t = triplet, q = quartet, p=pentet, m = multiplet.

UV-vis absorption spectra were recorded on an Agilent Cary 100 UV/Vis spectrometer (wavelength range: 200–800 nm) and using 0.10 mm thick 10 mm  $\times$  10 mm quartz cuvettes housing liquid samples at 25  $^\circ\text{C}$ . HR-MS were recorded at the Central Analytical Department of the University of Regensburg and the spectra were measured on a JOEL AccuTOF GCx instrument for electron ionization (EI), Agilent Q-TOF 6540 UHD instrument for electrospray ionization (ESI) and atmospheric-pressure chemical ionization (APCI).

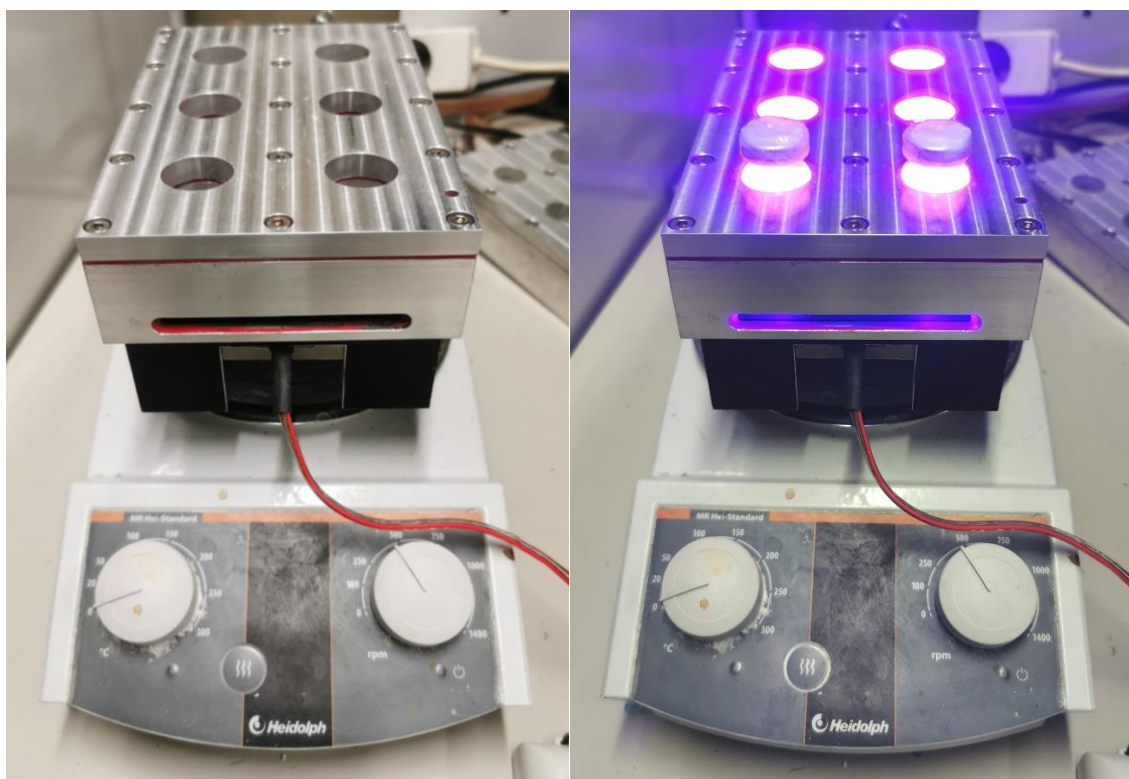

**Figure S1.** Typical photochemical reaction set-up using purple LEDs 3.8 W switched off (left) and on (right).

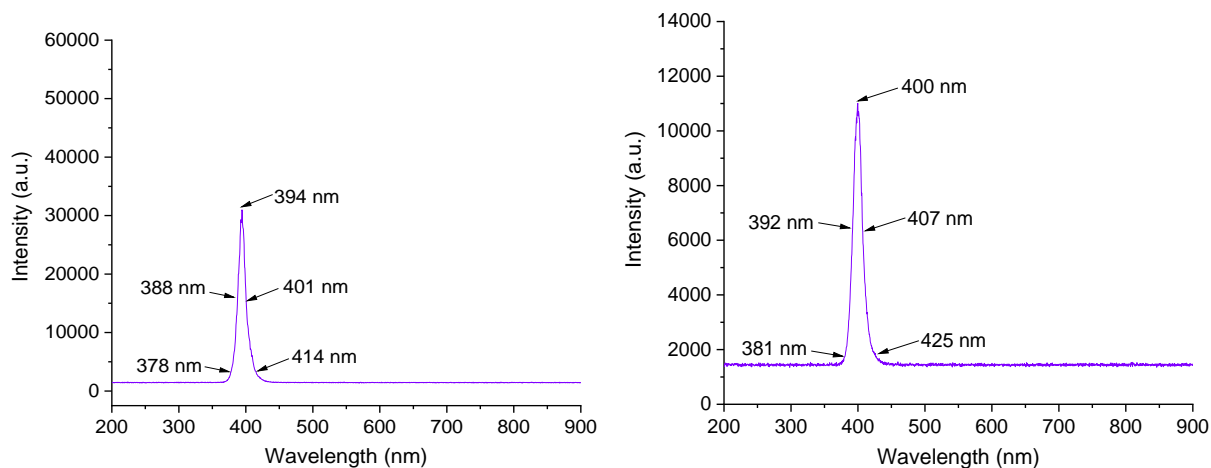

**Figure S2.** Relative LED intensities of 400 nm LEDs measured at a 30 cm distance directly above the LED. Input power of the higher intensity LED (left) = 3.8 W, input power of lower intensity LED (right) = 350 mW.

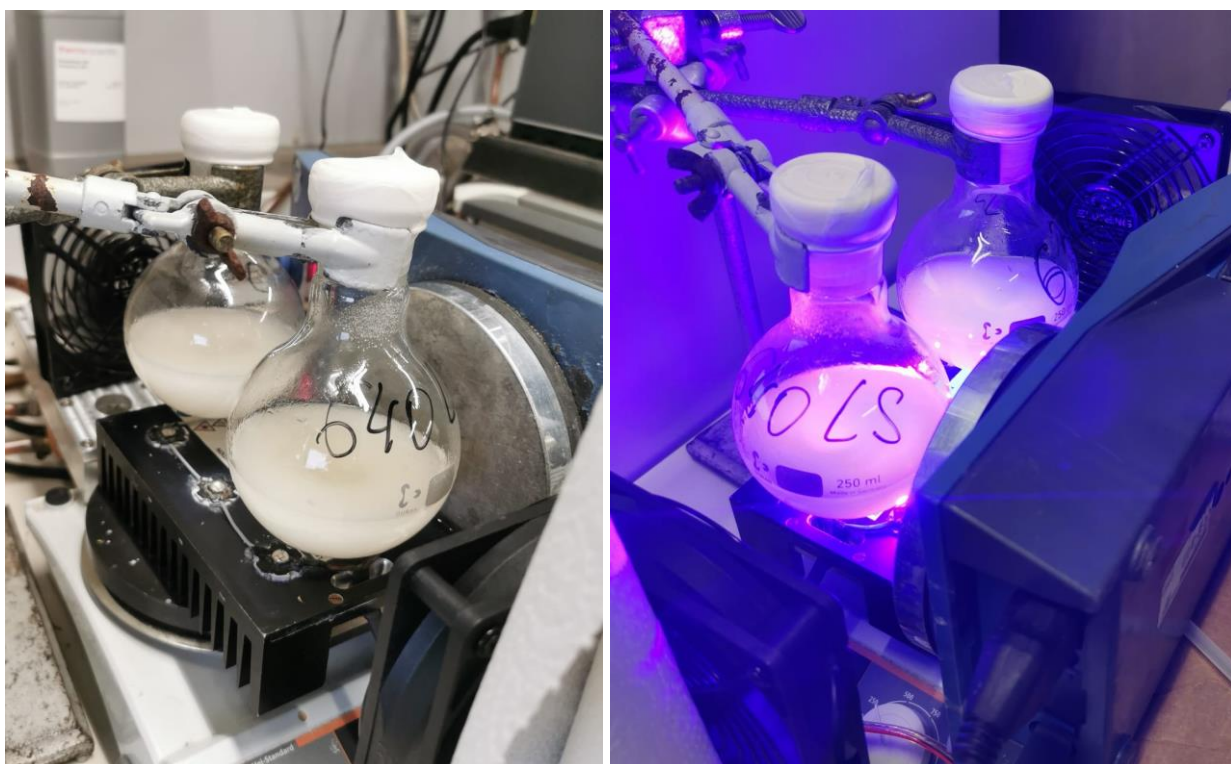

**Figure S3.** Gram-scale fluorination reactions were conducted by irradiation with LED Engine LZ4-40UB00-00U4 LEDs ( $\lambda = 395$  nm, 14.8 V, 700 mA).

Initial screening of additives (2.0 eq.) with butylphenyl acetate revealed that **H-TEDA(BF<sub>4</sub>)<sub>2</sub>** afforded the highest product yield (Table S1, entry 1). Boc-Val-OH and dibenzoyl tartaric acid gave similar yields (entries 3 and 6), however these additives were not as generally applicable across photochemical C(sp<sup>3</sup>)-H fluorinations of other substrates (Tables S1, S2 and S4).

**Table S1. Fluorination of butylphenyl acetate with different additives.**

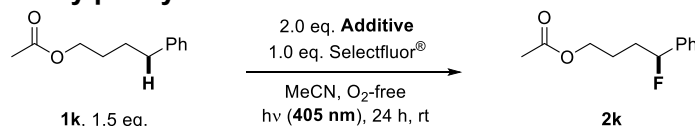

| Entry | Additive (2.0 eq.)                        | NMR yield (%) |
|-------|-------------------------------------------|---------------|
| 1     | <b>H-TEDA(BF<sub>4</sub>)<sub>2</sub></b> | 64            |
| 2     | TFA                                       | 43            |
| 3     | Boc-Val-OH                                | 63            |
| 4     | L- <i>tert</i> -Leucine                   | 37            |
| 5     | 2-(CF <sub>3</sub> )phenylglycine         | 22            |
| 6     | Dibenzoyl tartaric acid                   | 60            |
| 7     | Ditoluoyl tartaric acid                   | 35            |
| 8     | Dipivaloyl tartaric acid                  | 36            |

**Table S2. Fluorination of butylphenyl 4-fluorobenzoate with different additives.**

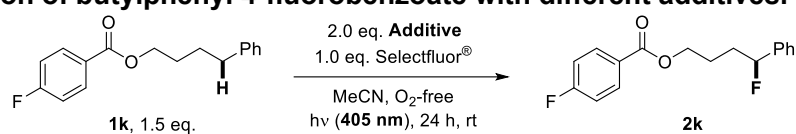

| Entry | Additive (2.0 eq.)                        | NMR yield (%) |
|-------|-------------------------------------------|---------------|
| 1     | <b>H-TEDA(BF<sub>4</sub>)<sub>2</sub></b> | 85            |
| 2     | Carbobenzyloxy-L-Valine                   | 41            |
| 3     | Boc-Val-OH                                | 66            |
| 4     | L-2-phenylglycine                         | 63            |
| 5     | Tartaric acid                             | 68            |
| 6     | Dibenzoyl tartaric acid                   | 55            |
| 7     | Ditoluoyl tartaric acid                   | traces        |
| 8     | Dipivaloyl tartaric acid                  | 65            |

**Table S3. Fluorination of hexyl propionate with different amount of H-TEDA(BF<sub>4</sub>)<sub>2</sub>.**

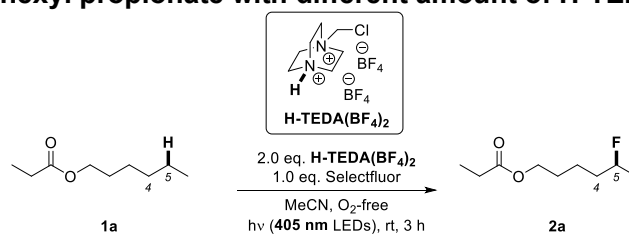

| Entry | Additive                                          | NMR yield (%) |
|-------|---------------------------------------------------|---------------|
| 1     | -                                                 | 0             |
| 2     | 0.1 eq. <b>H-TEDA(BF<sub>4</sub>)<sub>2</sub></b> | 48            |
| 3     | 0.5 eq. <b>H-TEDA(BF<sub>4</sub>)<sub>2</sub></b> | 53            |
| 4     | 1.0 eq. <b>H-TEDA(BF<sub>4</sub>)<sub>2</sub></b> | 43            |

|    |                                                    |    |
|----|----------------------------------------------------|----|
| 5  | 1.5 eq. <b>H-TEDA(BF<sub>4</sub>)<sub>2</sub></b>  | 91 |
| 6  | 2.0 eq. <b>H-TEDA(BF<sub>4</sub>)<sub>2</sub></b>  | 91 |
| 7  | 2.5 eq. <b>H-TEDA(BF<sub>4</sub>)<sub>2</sub></b>  | 88 |
| 8  | 3.0 eq. <b>H-TEDA(BF<sub>4</sub>)<sub>2</sub></b>  | 81 |
| 9  | 3.5 eq. <b>H-TEDA(BF<sub>4</sub>)<sub>2</sub></b>  | 96 |
| 10 | 4.0 eq. <b>H-TEDA(BF<sub>4</sub>)<sub>2</sub></b>  | 67 |
| 11 | 6.0 eq. <b>H-TEDA(BF<sub>4</sub>)<sub>2</sub></b>  | 91 |
| 12 | 8.0 eq. <b>H-TEDA(BF<sub>4</sub>)<sub>2</sub></b>  | 95 |
| 13 | 10.0 eq. <b>H-TEDA(BF<sub>4</sub>)<sub>2</sub></b> | 97 |

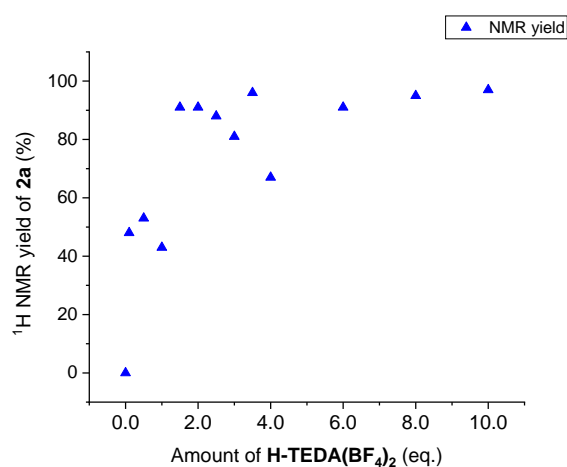

**Figure S4.** Plot of NMR yield of the reaction of **1a** vs equivalents of **H-TEDA(BF<sub>4</sub>)<sub>2</sub>** added.

In previous studies, hexyl propionate (**1a**) underwent C(sp<sup>3</sup>)-H fluorination in a good (~70%) yield in the presence of methyl 4-fluorobenzoate as a photocatalyst,<sup>1</sup> and has no photoactive auxiliary (benzoyl group) nor activated benzylic position. Therefore, it was chosen as a suitable substrate for screening loading of **H-TEDA(BF<sub>4</sub>)<sub>2</sub>**. In general, increasing the equivalents of **H-TEDA(BF<sub>4</sub>)<sub>2</sub>** increased the yield. However, in order to strike a balance with mass intensity, we identified 2.0 eq. **H-TEDA(BF<sub>4</sub>)<sub>2</sub>** as optimal. Therefore, 2.0 eq. **H-TEDA(BF<sub>4</sub>)<sub>2</sub>**, 1.0 eq. **SF** and 1.5 eq. substrate under 405 nm LED irradiation and under inert atmosphere were deemed to be the optimal conditions, under which reactions were complete after only 3 h providing 91% yield (Table S3, entry 5). Without **H-TEDA(BF<sub>4</sub>)<sub>2</sub>** additive, the reaction does not proceed at all (Table S3, entry 1). In the presence of methyl 4-fluorobenzoate (1 mol%), the yield was 0% after 3 h and 73% after 24 h.

We examined further the robustness of the process (Table S4). We established that inert atmosphere and light are crucial for the reaction to proceed successfully (entries 2-4). Gratifyingly, the addition of three drops of water did not change the outcome of the reaction (entry 5), meaning that unlike most previously reported photocatalytic fluorination methods, where they use dry solvent,<sup>2</sup> our conditions do not require a dry solvent, which is economically desirable. However, a threshold level of water shuts down the reaction. For example, when using a 10:1 and 1:1 ratio of MeCN and water - where **H-TEDA(BF<sub>4</sub>)<sub>2</sub>** and **SF** were dissolved completely - this did not afford product (entries 6,7). We assume that water interferes with heteroaggregate formation thus preventing the activation of **SF**. A 1:1 ratio of MeCN and DMSO did not

provide any product (entry 8). Using **NFSI** instead of **SF** provided only 40% fluorinated product (entries 9). Next, we investigated the importance of **H-TEDA(BF<sub>4</sub>)<sub>2</sub>** and its structure. **NH<sub>4</sub>•BF<sub>4</sub>** as a **BF<sub>4</sub>** source instead of **H-TEDA(BF<sub>4</sub>)<sub>2</sub>**, did not promote the reaction. To examine the importance of the N<sup>+</sup>-H moiety of **H-TEDA(BF<sub>4</sub>)<sub>2</sub>**, we used substrate **TEDA•BF<sub>4</sub>** that does not contain the N<sup>+</sup>-H moiety. No product was formed. Instead of the **BF<sub>4</sub>** counter-anion, other counter-anions of **H-TEDA<sup>2+</sup>** were examined such as **Cl** and **PF<sub>6</sub>**. The former gave no reaction, and the latter gave a low yield (entries 12,13). At last, we used protodefluorinated Selectfluor II instead of **H-TEDA(BF<sub>4</sub>)<sub>2</sub>** that did not work. After the optimization process, we concluded that all the structural features of **H-TEDA(BF<sub>4</sub>)<sub>2</sub>** such as its N<sup>+</sup>-H, **BF<sub>4</sub>**, and the methylene **Cl** substituent are important for the **H-TEDA(BF<sub>4</sub>)<sub>2</sub>** to function as active species.

**Table S4. Initial investigations and optimization of conditions.**

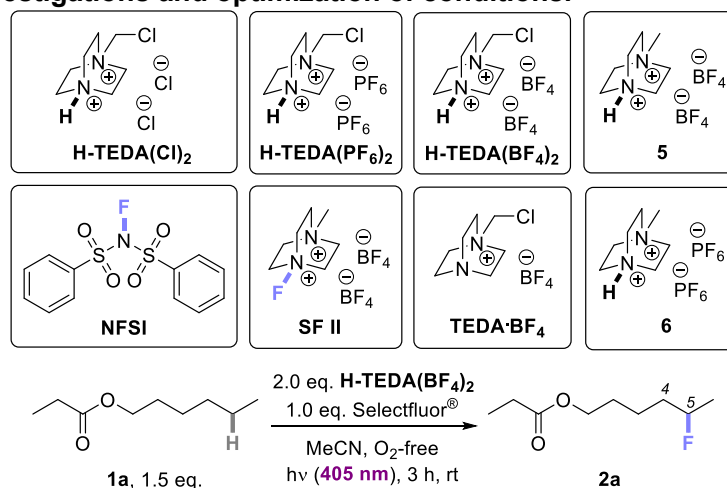

| Entry | Deviation from the standard conditions                                                         | NMR yield (%)   |
|-------|------------------------------------------------------------------------------------------------|-----------------|
| 1     | None                                                                                           | 91 <sup>a</sup> |
| 2     | No light                                                                                       | 0               |
| 3     | No <b>H-TEDA(BF<sub>4</sub>)<sub>2</sub></b>                                                   | 0               |
| 4     | Under air                                                                                      | 0               |
| 5     | + 3 drops of water                                                                             | 90 <sup>a</sup> |
| 6     | MeCN : H <sub>2</sub> O = 10:1 as solvent                                                      | 0               |
| 7     | MeCN : H <sub>2</sub> O = 1:1 as solvent                                                       | 0               |
| 8     | MeCN : DMSO = 1:1 as solvent                                                                   | 0               |
| 9     | <b>NFSI</b> instead of <b>SF</b>                                                               | 40 <sup>a</sup> |
| 10    | <b>SF II</b> instead of <b>SF</b>                                                              | 0               |
| 11    | <b>NH<sub>4</sub>•BF<sub>4</sub></b> instead of <b>H-TEDA(BF<sub>4</sub>)<sub>2</sub></b>      | 0               |
| 12    | <b>TEDA•BF<sub>4</sub></b> instead of <b>H-TEDA(BF<sub>4</sub>)<sub>2</sub></b>                | 0               |
| 13    | <b>H-TEDA(Cl)<sub>2</sub></b> instead of <b>H-TEDA(BF<sub>4</sub>)<sub>2</sub></b>             | 0               |
| 14    | <b>H-TEDA(PF<sub>6</sub>)<sub>2</sub></b> instead of <b>H-TEDA(BF<sub>4</sub>)<sub>2</sub></b> | 13              |
| 15    | <b>5</b> instead of <b>H-TEDA(BF<sub>4</sub>)<sub>2</sub></b>                                  | 0               |
| 16    | <b>6</b> instead of <b>H-TEDA(BF<sub>4</sub>)<sub>2</sub></b>                                  | traces          |
| 17    | <b>Py•H•BF<sub>4</sub></b> instead of <b>H-TEDA(BF<sub>4</sub>)<sub>2</sub></b>                | 70              |
| 18    | <b>Imid•H•BF<sub>4</sub></b> instead of <b>H-TEDA(BF<sub>4</sub>)<sub>2</sub></b>              | 62              |
| 19    | <b>TFA</b> instead of <b>H-TEDA(BF<sub>4</sub>)<sub>2</sub></b>                                | 63              |
| 20    | <b>Ph-Gly</b> instead of <b>H-TEDA(BF<sub>4</sub>)<sub>2</sub></b>                             | 15              |
| 21    | <b>Tartaric acid</b> instead of <b>H-TEDA(BF<sub>4</sub>)<sub>2</sub></b>                      | 92              |

|    |                                                                                             |    |
|----|---------------------------------------------------------------------------------------------|----|
| 22 | <b>Boc-Val-OH</b> instead of <b>H-TEDA(BF<sub>4</sub>)<sub>2</sub></b>                      | 70 |
| 23 | <b>Acetic acid</b> instead of <b>H-TEDA(BF<sub>4</sub>)<sub>2</sub></b>                     | 0  |
| 24 | <b>TEA·H·BF<sub>4</sub></b> instead of <b>H-TEDA(BF<sub>4</sub>)<sub>2</sub></b>            | 35 |
| 25 | <b>L-tert-Leucine</b> instead of <b>H-TEDA(BF<sub>4</sub>)<sub>2</sub></b>                  | 0  |
| 26 | <b>2-(CF<sub>3</sub>)phenylglycine</b> instead of <b>H-TEDA(BF<sub>4</sub>)<sub>2</sub></b> | 0  |
| 27 | <b>Camphorsulfonic acid</b> instead of <b>H-TEDA(BF<sub>4</sub>)<sub>2</sub></b>            | 0  |

Unless otherwise specified, substrate concentration was [0.15 M] and a 3.8 W 400 nm LED was employed. NMR yields were determined by <sup>19</sup>F NMR spectroscopy with pentafluorobenzene as an internal standard. <sup>a</sup> Combined yields of the regioisomers (C4 and C5 positions).

### Synthesis of H-TEDA(BF<sub>4</sub>)<sub>2</sub> from DABCO:

In order to make additive **H-TEDA(BF<sub>4</sub>)<sub>2</sub>** accessible for use, we considered three pathways for its synthesis:

**Pathway A** (consists of 2 steps) and **Pathway B** (consists of 3 steps) and **Pathway C** (consists of 3 steps).

The first step in all pathways is the same – alkylation of DABCO:

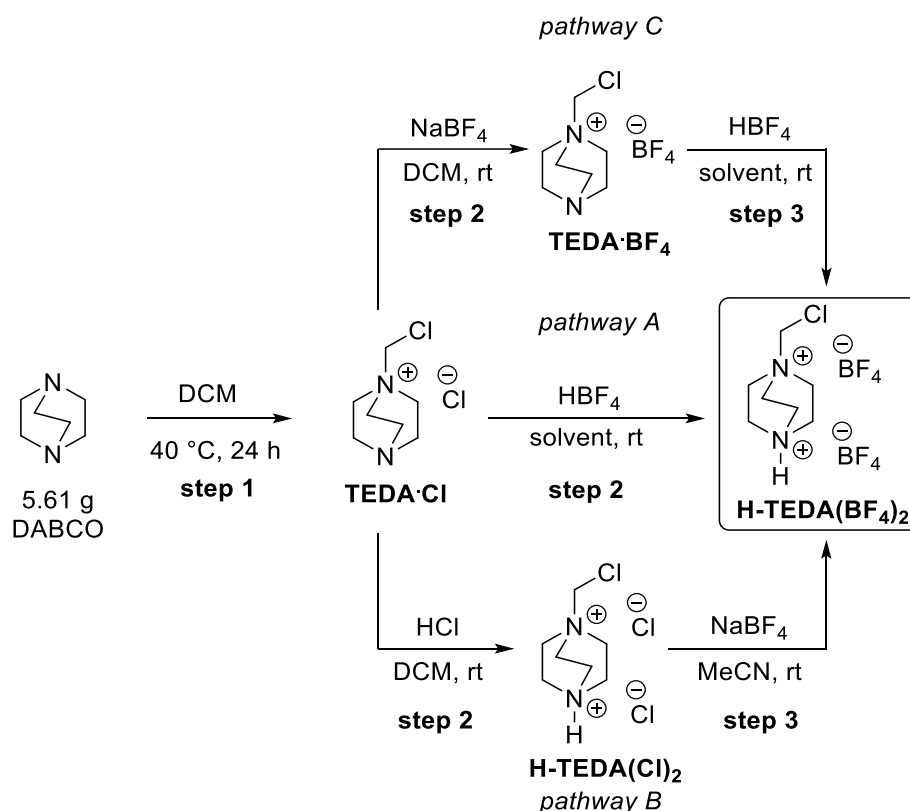

### Scheme S1. Preparation of H-TEDA(BF<sub>4</sub>)<sub>2</sub> and derivatives.

In order to examine the impact of derivatives of **H-TEDA(BF<sub>4</sub>)<sub>2</sub>** to understand which structural aspects were key for promotion of the 'photocatalyst'-free reactivity, we synthesized derivatives of **H-TEDA(BF<sub>4</sub>)<sub>2</sub>**. We synthesized **H-TEDA(BF<sub>4</sub>)<sub>2</sub>** and **TEDA·BF<sub>4</sub>** with different counter-anions and compounds **5 - 7** and used them in fluorination reactions. However, none of those substrates showed any efficiency as initial **H-TEDA(BF<sub>4</sub>)<sub>2</sub>**, revealing the key importance of the <sup>-</sup>BF<sub>4</sub> counter-anion, the N<sup>+</sup>-H moiety and the CH<sub>2</sub>Cl moiety in the heteroaggregate formation or reactivity.

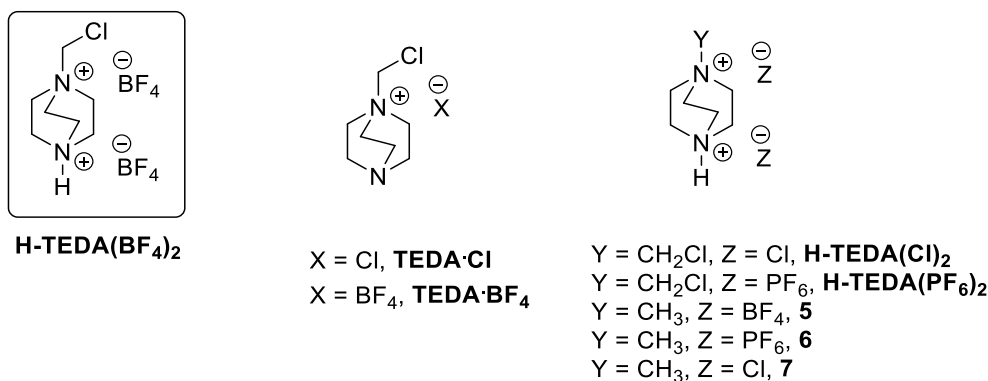

**Figure S5. Structures of derivatives of H-TEDA(BF<sub>4</sub>)<sub>2</sub> synthesized.**

**Synthesis of H-TEDA(BF<sub>4</sub>)<sub>2</sub>:**

**Step 1** – alkylation: 1,4-diazabicyclo[2.2.2]octane (DABCO, also known as triethylenediamine (TEDA)) (5.61 g, 50.0 mmol, 1.0 eq.) was dissolved in DCM (100 mL) and refluxed under 40 °C for 24 h. The reaction mixture was used for the second step.

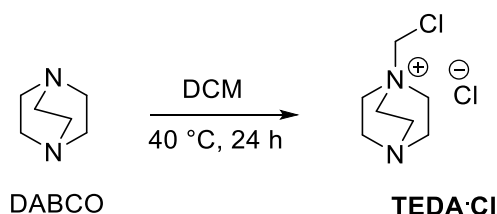

**Scheme S2. Alkylation of DABCO with DCM.**

**Pathway A: Step 2** – counterion exchange and protonation:

- To the reaction mixture from *Step 1*, solution of tetrafluoroboric acid (48 wt.% in H<sub>2</sub>O) (20.0 mL, 150 mmol, 3.0 eq.) was added. The reaction mixture was stirred for 1 h and concentrated *in vacuo* to afford **H-TEDA(BF<sub>4</sub>)<sub>2</sub>** (quantitative yield, 16.81 g, 50.0 mmol).
- To the reaction mixture from *Step 1* was concentrated *in vacuo* and the dry product was obtained. The product was dissolved in acetone (50 mL) and solution of tetrafluoroboric acid (48 wt.% in H<sub>2</sub>O) (20.0 mL, 150 mmol, 3.0 eq.) was added. The reaction mixture was stirred for 1 h. The white solid that precipitated was filtered and dried *in vacuo* to afford **H-TEDA(BF<sub>4</sub>)<sub>2</sub>** (quantitative yield, 16.81 g, 49.96 mmol).

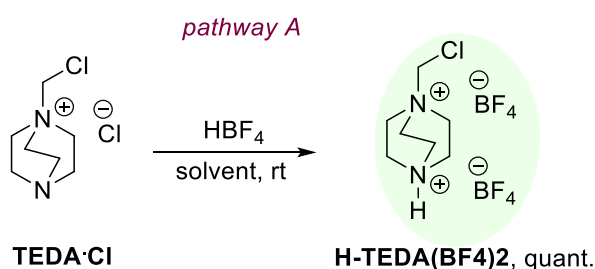

**Scheme S3. Counter-anion exchange and protonation of TEDA·Cl.**



**Pathway B: Step 2 – protonation:**

- To the reaction mixture from *Step 1*, solution of hydrochloric acid (12 M in H<sub>2</sub>O) (8.3 mL, 100 mmol, 2.0 eq.) was added. The reaction mixture was stirred for 1 h and concentrated *in vacuo* to provide **H-TEDA(Cl)<sub>2</sub>** as a white solid (quantitative yield, 11.67 g, 49.97 mmol).

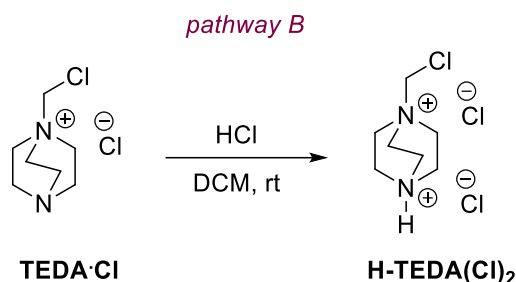

**Scheme S4. Protonation of TEDA·Cl.**

**Step 3 – counterion exchange:**

- The product from *Step 2* (*Pathway B*) was added to the solution of NaBF<sub>4</sub> (11.53 g, 105.0 mmol, 2.1 eq.) in MeCN (100 mL). The reaction mixture was stirred for 1 hour. Sodium chloride was precipitated as a white solid that was filtered out and the filtrate was dried *in vacuo* to provide the desired product - **H-TEDA(BF<sub>4</sub>)<sub>2</sub>** (98% yield, 16,48 g, 49,0 mmol).

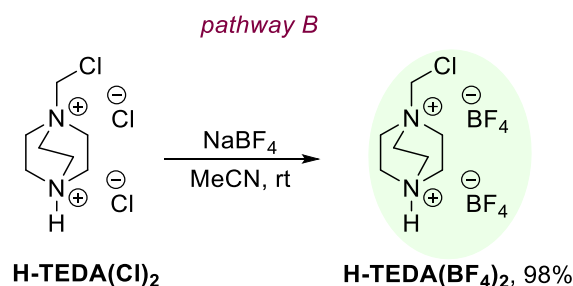

**Scheme S5. Counter-anion exchange of H-TEDA(Cl)<sub>2</sub>.**

**Pathway C: Step 2 – counterion exchange:**

- To the reaction mixture from *Step 1*, solution of NaBF<sub>4</sub> (55 mmol, 1.1 eq.) was added. The reaction mixture was stirred for 1 hour and then was concentrated *in vacuo* to provide white solid as the product (**TEDA·BF<sub>4</sub>**).

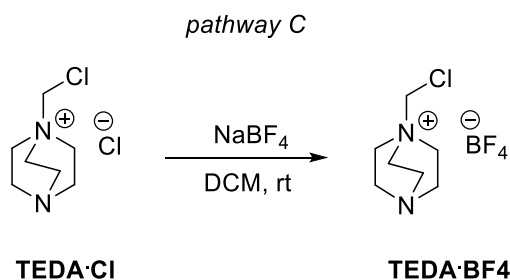

**Scheme S6. Counter-anion exchange of TEDA·Cl.**

### Step 3 – counterion exchange and protonation:

- The product from *Step 2 (Pathway C)* was dissolved in acetonitrile (50 mL) and solution of tetrafluoroboric acid (48 wt.% in H<sub>2</sub>O) (10.0 mL, 75 mmol, 1.5 eq.) was added to the solution. The reaction mixture was stirred for 1 hour. A white solid was precipitated that was filtered and dried in vacuo to provide the desired product - **H-TEDA(BF<sub>4</sub>)<sub>2</sub>** (quantitative yield, 16.80 g, 49.96 mmol).
- The product *Step 2 (Pathway C)* was dissolved in acetone (50 mL) and solution of tetrafluoroboric acid (48 wt.% in H<sub>2</sub>O) (10.0 mL, 75 mmol, 1.5 eq.) was added to the solution. The reaction mixture was stirred for 1 hour. A white solid was precipitated that was filtered and dried in vacuo to provide the desired product - **H-TEDA(BF<sub>4</sub>)<sub>2</sub>** (quantitative yield, 16.81 g, 50.0 mmol).

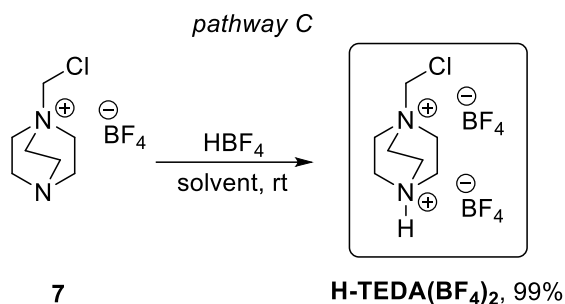

### Scheme S7. Protonation of TEDA·BF<sub>4</sub>.

#### Isolation of H-TEDA(BF<sub>4</sub>)<sub>2</sub> After Fluorination Reactions for Recycling:

Upon completion of fluorination reaction, diethyl ether was added to the reaction mixture, and instant precipitation of **H-TEDA(BF<sub>4</sub>)<sub>2</sub>** was observed. The mixture was filtered into a flask and the residue was washed with more diethyl ether. The residue was dried, and in all cases was deemed pure by NMR. This **H-TEDA(BF<sub>4</sub>)<sub>2</sub>** was used for further fluorination reactions.

#### 1-(chloromethyl)-1,4-diazabicyclo[2.2.2]octane-1,4-diiium ditetrafluoroborate (H-TEDA(BF<sub>4</sub>)<sub>2</sub>)

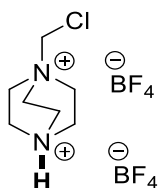

Yield: 97%; white solid; IR (neat)  $\nu$  (cm<sup>-1</sup>): 3179, 3060, 3012, 1480, 1409, 1338, 1290, 1036, 943, 895, 850, 798, 764, 731; <sup>1</sup>H NMR (400 MHz, CD<sub>3</sub>CN)  $\delta$  7.45 (br. s, 1H), 5.20 (s, 2H), 3.82 (dt, *J* = 15.0, 6.7 Hz, 12H) ppm; <sup>13</sup>C NMR (101 MHz, CD<sub>3</sub>CN)  $\delta$  70.1, 51.0, 45.1 ppm; <sup>19</sup>F NMR (377 MHz, CD<sub>3</sub>CN)  $\delta$  -150.0 (s), -150.1 (s) ppm; HRMS (ESI) (*m/z*) [*M-H*]<sup>+</sup>: exact mass calc. for C<sub>7</sub>H<sub>14</sub>ClN<sub>2</sub><sup>+</sup>: 161.0840; found: 161.0837.

#### 1-(chloromethyl)-1,4-diazabicyclo[2.2.2]octan-1-ium chloride (TEDA·Cl)

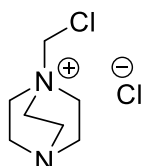

$^1\text{H}$  NMR (400 MHz, DMSO)  $\delta$  5.67 (s, 2H), 3.62 – 3.50 (m, 6H), 3.18 – 3.01 (m, 6H) ppm;  $^{13}\text{C}$  NMR (101 MHz, DMSO)  $\delta$  68.2, 51.3, 45.3 ppm; HRMS (ESI) ( $m/z$ ) [ $M$ ] $^+$ : exact mass calc. for  $\text{C}_7\text{H}_{14}\text{ClN}_2^+$ : 161.0840; found: 161.0845.

### 1-(chloromethyl)-1,4-diazabicyclo[2.2.2]octane-1,4-dium dichloride (H-TEDA(Cl) $_2$ )

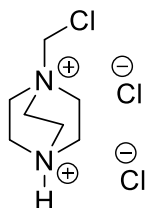

$^1\text{H}$  NMR (400 MHz,  $\text{D}_2\text{O}$ )  $\delta$  5.48 (s, 2H), 4.19 – 4.07 (m, 6H), 4.03 – 3.91 (m, 6H) ppm;  $^{13}\text{C}$  NMR (101 MHz,  $\text{D}_2\text{O}$ )  $\delta$  69.1, 50.2, 43.9 ppm; HRMS (ESI) ( $m/z$ ) [ $M$ ] $^+$ : exact mass calc. for  $\text{C}_7\text{H}_{14}\text{ClN}_2^+$ : 161.0840; found: 161.0840.

### 1-(chloromethyl)-1,4-diazabicyclo[2.2.2]octan-1-ium tetrafluoroborate (TEDA· $\text{BF}_4$ )

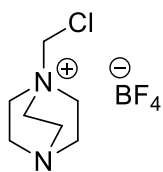

IR (neat)  $\nu$  ( $\text{cm}^{-1}$ ): 3630, 3049, 2974, 2900, 1636, 1469, 1364, 1327, 1290, 1047, 906, 842, 790, 686;  $^1\text{H}$  NMR (400 MHz, DMSO)  $\delta$  5.29 (s, 2H), 3.48 – 3.35 (m, 6H), 3.20 – 3.06 (m, 6H) ppm;  $^{13}\text{C}$  NMR (101 MHz, DMSO)  $\delta$  68.6, 51.7, 45.4 ppm;  $^{19}\text{F}$  NMR (377 MHz, DMSO)  $\delta$  -147.9 (s), -148.0 (s) ppm; HRMS (ESI) ( $m/z$ ) [ $M$ ] $^+$ : exact mass calc. for  $\text{C}_7\text{H}_{14}\text{ClN}_2^+$ : 161.0841; found: 161.0839.

### 1-(chloromethyl)-1,4-diazabicyclo[2.2.2]octane-1,4-dium dihexafluorophosphate (H-TEDA( $\text{PF}_6$ ) $_2$ )

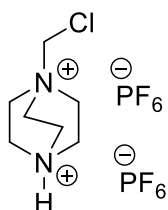

$^1\text{H}$  NMR (400 MHz,  $\text{CD}_3\text{CN}$ )  $\delta$  6.07 – 5.28 (br. s, 1H), 5.16 (s, 2H), 3.82 (m, 6H), 3.71 (m, 6H) ppm;  $^{13}\text{C}$  NMR (101 MHz,  $\text{CD}_3\text{CN}$ )  $\delta$  69.8, 50.7, 44.7 ppm;  $^{19}\text{F}$  NMR (377 MHz,  $\text{CD}_3\text{CN}$ )  $\delta$  -70.7 (s), -72.6 (s) ppm;  $^{31}\text{P}$  NMR (162 MHz,  $\text{CD}_3\text{CN}$ )  $\delta$  -143.1 (hept,  $J$  = 706.3 Hz) ppm; HRMS (ESI) ( $m/z$ ) [ $M$ ] $^+$ : exact mass calc. for  $\text{C}_7\text{H}_{14}\text{ClN}_2^+$ : 161.0840; found: 161.0840.

### 1-methyl-1,4-diazabicyclo[2.2.2]octane-1,4-dium ditetrafluoroborate (5)

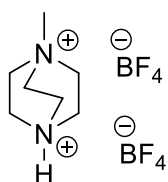

Prepared in two steps. *Step 1* was performed according to the literature procedure.<sup>3</sup> To a solution of DABCO (1 g, 8.9 mmol) in hexane (25 ml), methyl iodide (0.5 ml, 8.9 mmol) was added slowly at 0°C and stirred for

1 h at room temperature. The reaction mixture was concentrated in vacuo, and the residue was washed with hexanes (100 ml) and dried to yield a slightly yellow solid (2.06 g, 91%). The product was used directly for *Step 2*.

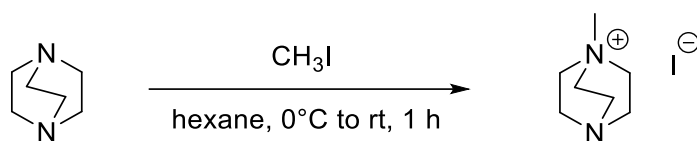

*Step 2* is the same procedure that was used for **H-TEDA(BF<sub>4</sub>)<sub>2</sub>** synthesis, **Pathway A**, *Step 2*.

<sup>1</sup>H NMR (400 MHz, CD<sub>3</sub>CN) δ 6.97 (br. s, 1H), 3.73 (dq, *J* = 9.8, 6.2 Hz, 12H), 3.21 (s, 3H) ppm; <sup>13</sup>C NMR (101 MHz, CD<sub>3</sub>CN) δ 53.4 – 53.0 (m), 44.9 (s) ppm; <sup>19</sup>F NMR (377 MHz, CD<sub>3</sub>CN) δ -150.0 (s), -150.1 (s) ppm; HRMS (ESI) (*m/z*) [*M*]<sup>+</sup>: exact mass calc. for C<sub>7</sub>H<sub>15</sub>N<sub>2</sub><sup>+</sup>: 127.1230; found: 127.1238.

### 1-methyl-1,4-diazabicyclo[2.2.2]octane-1,4-diiium dihexafluorophosphate (6)

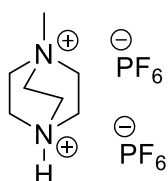

Prepared in two steps. *Step 1* is the same procedure that was used for synthesis of substrate **5**, *Step 1*.

*Step 2* is the same procedure that was used for **H-TEDA(BF<sub>4</sub>)<sub>2</sub>** synthesis, **Pathway A**, *Step 2*, but using HPF<sub>6</sub> instead of HBF<sub>4</sub>.

<sup>1</sup>H NMR (400 MHz, CD<sub>3</sub>CN) δ 7.17 (s, 1H), 3.66 (dq, *J* = 10.4, 6.5 Hz, 12H), 3.18 (s, 3H) ppm; <sup>13</sup>C NMR (101 MHz, CD<sub>3</sub>CN) δ 53.5 – 53.0 (m), 44.7 (s) ppm; <sup>19</sup>F NMR (377 MHz, CD<sub>3</sub>CN) δ -70.6 (s), -72.4 (s) ppm; <sup>31</sup>P NMR (162 MHz, CD<sub>3</sub>CN) δ -143.1 (hept, *J* = 706.8 Hz) ppm; HRMS (ESI) (*m/z*) [*M*]<sup>+</sup>: exact mass calc. for C<sub>7</sub>H<sub>15</sub>N<sub>2</sub><sup>+</sup>: 127.1230; found: 127.1232.

### 1-methyl-1,4-diazabicyclo[2.2.2]octane-1,4-diiium dichloride (7)

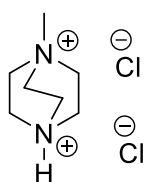

Prepared in two steps. *Step 1* is the same procedure that was used for synthesis of substrate **5**, *Step 1*.

*Step 2* is the same procedure that was used for **H-TEDA(BF<sub>4</sub>)<sub>2</sub>** synthesis, **Pathway B**, *Step 2*.

<sup>1</sup>H NMR (400 MHz, D<sub>2</sub>O) δ 4.08 – 3.87 (m, 12H), 3.40 (s, 3H) ppm; <sup>13</sup>C NMR (101 MHz, D<sub>2</sub>O) δ 53.2 – 52.9 (m), 52.8 – 52.5 (m), 44.0 (s) ppm; HRMS (ESI) (*m/z*) [*M*]<sup>+</sup>: exact mass calc. for C<sub>7</sub>H<sub>15</sub>N<sub>2</sub><sup>+</sup>: 127.1230; found: 127.1230.

## 2 Synthesis

### 2.1 Synthesis of Starting Materials

#### General Procedure 1: Esterification

To a solution of DMAP (0.1 eq.), Et<sub>3</sub>N (1.5 eq.) in DCM (0.2 M) alcohol (1.0 eq.) was added and the mixture was cooled to 0°C. Benzoyl chloride (1.2 eq.) was added dropwise to the reaction mixture and the reaction was stirred overnight at room temperature (rt). The solution was quenched with H<sub>2</sub>O and extracted three times with DCM (20 mL). Combined organic layers were dried over NaSO<sub>4</sub>, filtrated, and concentrated *in vacuo*. The residue was purified by column chromatography using silica gel and the specified eluent to yield the desired ester.

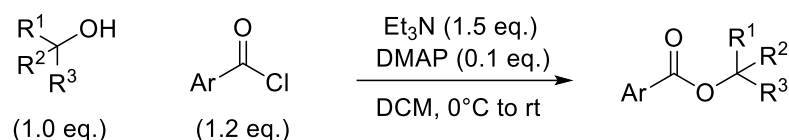

#### Scheme S8. Esterification of alcohols.

#### Methyl 2-(4-isobutylphenyl)propanoate (1m)

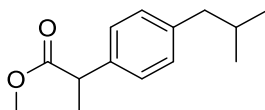

Prepared according to the literature procedure.<sup>4</sup> To the mixture of Ibuprofen (5.00 mmol, 1.0 eq.) and DMAP (0.50 mmol, 0.1 eq.) in 10 mL DCM, methanol (15.00 mmol, 3.0 eq.) was added at 0 °C and stirred for 5 min. DCC (5.50 mmol, 1.1 eq.) was added next and stirred at 0 °C for 5 more minutes. The reaction was allowed to reach rt and stirred for 3 h. The resulting precipitates were filtered, and the filtrate was treated with diluted HCl and the product was extracted three times with DCM. The organic layers were combined, dried over MgSO<sub>4</sub>, filtered and concentrated *in vacuo*. The residue was purified by column chromatography using 5% EtOAc in pentane to provide the desired product.

Yield: 1.05 g, 95%; colorless liquid; <sup>1</sup>H NMR (400 MHz, CDCl<sub>3</sub>) δ 7.20 (d, *J* = 8.1 Hz, 2H), 7.11 (d, *J* = 8.1 Hz, 2H), 3.70 (q, *J* = 7.2 Hz, 1H), 3.67 (s, 3H), 2.46 (d, *J* = 7.2 Hz, 2H), 1.86 (td, *J* = 13.6, 6.8 Hz, 1H), 1.51 (d, *J* = 7.2 Hz, 3H), 0.91 (d, *J* = 6.6 Hz, 6H) ppm. HRMS (ESI) (*m/z*) [M]<sup>+</sup>: exact mass calc. for C<sub>14</sub>H<sub>20</sub>O<sub>2</sub>: 220.1463, found: 220.1462.

The data are consistent with our published literature.<sup>1</sup>

#### 4-Phenylbutyl acetate (1k)

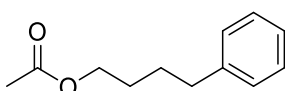

Prepared according to the **General Procedure 1**. Yield: 1.88 g, 98%, colorless oil; <sup>1</sup>H NMR (400 MHz, CDCl<sub>3</sub>) δ 7.34 – 7.16 (m, 5H), 4.11 (dd, *J* = 8.6, 4.0 Hz, 2H), 2.66 (t, *J* = 7.2 Hz, 2H), 2.05 (s, 3H), 1.78 – 1.56 (m, 4H). HRMS (EI) (*m/z*) [M]<sup>+</sup>: exact mass calc. for C<sub>12</sub>H<sub>16</sub>O<sub>2</sub>: 192.1150, found: 192.1148.

The data are consistent with our published literature.<sup>1</sup>

**Methyl (*R*)-4-((5*S*,8*R*,9*S*,10*S*,13*R*,14*S*,17*R*)-10,13-dimethyl-3,7,12-trioxohexadecahydro-1*H*-cyclopenta[*a*]phenanthren-17-yl)pentanoate (1p)**

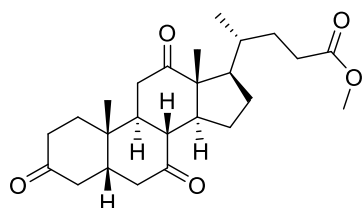

Prepared according to the literature procedure.<sup>5</sup> To a mixture of Dehydrocholic acid (5.00 mmol, 1.0 eq.) and Cs<sub>2</sub>CO<sub>3</sub> (6.20 mmol 1.2 eq.) in 10 mL DMF, methyl iodide (28.50 mmol, 5.7 eq.) was added and the mixture was stirred at rt for 24 h. After the addition of water (40 mL), a white precipitate was obtained that was filtered and dried. Yield: 1.94 g, 93%; white solid, m.p. 150-152 °C; <sup>1</sup>H NMR (400 MHz, CDCl<sub>3</sub>) δ 3.65 (d, *J* = 1.1 Hz, 3H), 2.96 – 2.75 (m, 3H), 2.44 – 2.16 (m, 8H), 2.13 (dd, *J* = 12.8, 5.9 Hz, 2H), 2.05 – 1.90 (m, 4H), 1.88 – 1.78 (m, 2H), 1.60 (tt, *J* = 11.6, 5.9 Hz, 1H), 1.41 – 1.22 (m, 7H), 1.06 (s, 3H), 0.83 (d, *J* = 6.5 Hz, 3H) ppm. HRMS (EI) (*m/z*) [M]<sup>+</sup>: exact mass calc. for C<sub>25</sub>H<sub>36</sub>O<sub>5</sub>: 416.2563, found: 416.2560.

The data are consistent with our published literature.<sup>1</sup>

## 2.2 Synthesis of Fluorinated products

### General Procedure A

To a 5 mL clear crimp vial charged with a stir bar were added **SF** (0.2 mmol, 1.0 eq.), **H-TEDA(BF<sub>4</sub>)<sub>2</sub>** (0.4 mmol, 2.0 eq.), and anhydrous MeCN (2.0 mL). The starting material (0.3 mmol, 1.5 eq.) was added next, and the reaction mixture was degassed *via* three cycles of *Freeze-Pump-Thaw*. The reaction mixture was then irradiated using a 405 nm LED for 2 h at rt. Product identity and yields were determined by <sup>19</sup>F NMR spectroscopy with pentafluorobenzene as an internal standard. The reaction mixture was then diluted with diethyl ether, filtrated, concentrated, and purified by silica gel flash column chromatography using the specified eluent to provide the desired product.

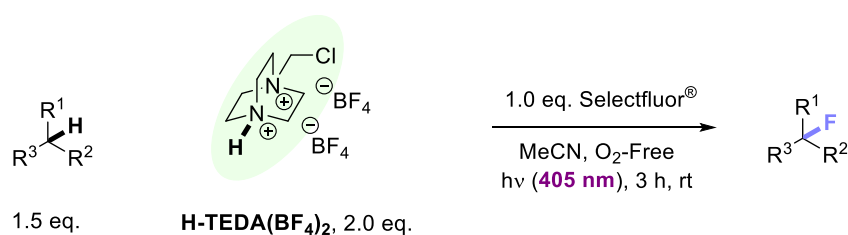

### Scheme S9. Catalyst-free Photochemical C(sp<sup>3</sup>)-H Fluorination

#### 1-Fluorocyclooctane (2b)

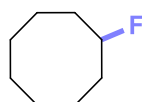

Prepared according to the **General Procedure A**. NMR yield: 93% (according to <sup>19</sup>F NMR with pentafluorobenzene as an internal standard); <sup>19</sup>F NMR (377 MHz, CDCl<sub>3</sub>) δ -160.0 ppm (s). HRMS (EI) (*m/z*) [M]<sup>+</sup>: exact mass calc. for C<sub>8</sub>H<sub>15</sub>F: 130.1158; found: 130.1160.

The data are consistent with our published literature.<sup>1</sup>

### (3s,5s,7s)-1-Fluoroadamantane (2c)

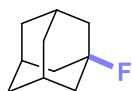

Prepared according to the **General Procedure A**. Yield: 18.0 mg, 58%; white solid, m.p. 230-232 °C; <sup>1</sup>H NMR (400 MHz, CDCl<sub>3</sub>) δ 2.23 (br. s, 1H), 1.90 (dd, *J* = 5.6, 3.0 Hz, 2H), 1.70 – 1.58 (m, 2H) ppm; <sup>19</sup>F NMR (377 MHz, CDCl<sub>3</sub>) δ -128.8 – -129.2 (m) ppm. HRMS (EI) (*m/z*) [*M*]<sup>+</sup>: exact mass calc. for C<sub>10</sub>H<sub>15</sub>F: 154.1158, found: 154.1156.

The data are consistent with our published literature.<sup>1</sup>

### Fluorocyclododecane (2d)

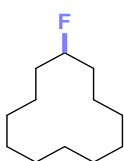

Prepared according to the **General Procedure A**. Yield: 34.0 mg, 91%; colorless solid, m.p. 48-50 °C; <sup>1</sup>H NMR (400 MHz, CDCl<sub>3</sub>) δ 4.71 (dtt, *J* = 47.5, 7.2, 4.6 Hz, 1H), 1.88 – 1.71 (m, 2H), 1.62 (m, 2H), 1.46 – 1.25 (m, 18H) ppm; <sup>13</sup>C NMR (101 MHz, CDCl<sub>3</sub>) δ 92.5 (d, *J* = 164.8 Hz), 29.9 (d, *J* = 21.0 Hz), 24.1 (s), 23.8 (s), 23.3 (s), 23.2 (s), 20.6 (d, *J* = 6.9 Hz) ppm; <sup>19</sup>F NMR (377 MHz, CDCl<sub>3</sub>) δ -176.1 – -176.9 (m) ppm; HRMS (ESI) (*m/z*) [*M*<sup>+</sup>-HF]<sup>+</sup>: exact mass calc. for C<sub>12</sub>H<sub>22</sub>: 166.1716; found: 166.1722.

The data are consistent with the literature.<sup>2b</sup>

### 5-Fluorodecanedinitrile (2e)

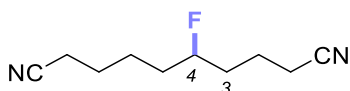

Prepared according to the **General Procedure A** (4F:3F=4:1 ratio). Yield: 25.5 mg, 70%; colorless oil; <sup>1</sup>H NMR (400 MHz, CDCl<sub>3</sub>) δ 4.69 – 4.39 (m, 1H), 2.36 (ddd, *J* = 11.9, 9.6, 5.9 Hz, 4H), 1.90 – 1.44 (m, 10H) ppm; <sup>19</sup>F NMR (377 MHz, CDCl<sub>3</sub>) δ -182.7 – -183.3 (m), -185.2 – -185.7 (m) ppm. HRMS (ESI) (*m/z*) [*M*-H]<sup>+</sup>: exact mass calc. for C<sub>10</sub>H<sub>15</sub>FN<sub>2</sub>: 181.1141, found: 181.1142.

The data are consistent with our published literature.<sup>1</sup>

### 1,10-dibromo-5-fluorodecane (2f)

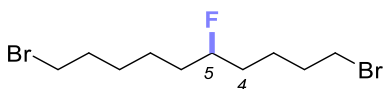

Prepared according to the **General Procedure A** (5F:4F=1.7:1 ratio). Yield: 48.0 mg, 75%; colorless oil; <sup>1</sup>H NMR (400 MHz, CDCl<sub>3</sub>) δ 4.60 – 4.35 (m, 1H), 3.50 – 3.35 (m, 4H), 1.98 – 1.31 (m, 14H) ppm; <sup>19</sup>F NMR (377 MHz, CDCl<sub>3</sub>) δ -181.2 – -181.6 (m), -181.5 – -181.9 (m) ppm. HRMS (ESI) (*m/z*) [*M*-HF]<sup>+</sup>: exact mass calc. for C<sub>10</sub>H<sub>19</sub>Br<sub>2</sub>F: 295.9770 found: 295.9776.

The data are consistent with our published literature.<sup>1</sup>

### (3-bromo-1-fluoropropyl)benzene (2g)

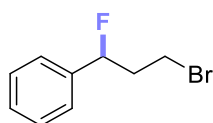

Prepared according to the **General Procedure A**. Yield: 30.0 mg, 69%; slightly yellow oil; <sup>1</sup>H NMR (400 MHz, CDCl<sub>3</sub>) δ 7.55 – 7.33 (m, 5H), 5.70 (ddd, *J* = 47.8, 8.8, 3.9 Hz, 1H), 3.73 – 3.38 (m, 2H), 2.55 (m, 1H), 2.30 (m, 1H) ppm; <sup>19</sup>F NMR (377 MHz, CDCl<sub>3</sub>) δ -176.8 – -177.2 (m) ppm. HRMS (EI) (*m/z*) [*M*]<sup>+</sup>: exact mass calc. for C<sub>9</sub>H<sub>10</sub>BrF: 215.9950, found: 215.9942.

The data are consistent with our published literature.<sup>1</sup>

### (4-chloro-1-fluorobutyl)benzene (2h)

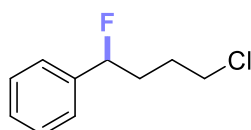

Prepared according to the **General Procedure A**. Yield: 25.0 mg, 67%; colorless oil; <sup>1</sup>H NMR (400 MHz, CDCl<sub>3</sub>) δ 7.35 – 7.20 (m, 5H), 5.40 (ddd, *J* = 47.7, 7.9, 4.3 Hz, 1H), 3.67 – 3.38 (m, 2H), 2.12 – 1.74 (m, 4H) ppm; <sup>13</sup>C NMR (101 MHz, CDCl<sub>3</sub>) δ 139.9 (d, *J* = 19.8 Hz), 128.6 (s), 128.4 (d, *J* = 1.8 Hz), 125.4 (d, *J* = 6.9 Hz), 93.8 (d, *J* = 171.4 Hz), 44.6 (s), 34.5 (d, *J* = 23.9 Hz), 28.2 (d, *J* = 3.8 Hz) ppm; <sup>19</sup>F NMR (377 MHz, CDCl<sub>3</sub>) δ -176.2 – -176.7 (m) ppm; HRMS (EI) (*m/z*) [*M*]<sup>+</sup>: exact mass calc. for C<sub>10</sub>H<sub>12</sub>ClF: 186.0612; found: 186.0606.

### 4-(3-Fluorobutyl)benzonitrile (2i)

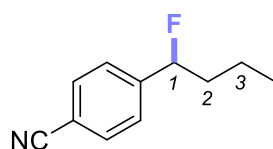

Prepared according to the **General Procedure A**. Yield: 31.0 mg, 87%; colorless oil; <sup>1</sup>H NMR (400 MHz, CDCl<sub>3</sub>) δ 7.55 – 7.49 (m, 2H), 7.25 (d, *J* = 8.2 Hz, 2H), 4.76 – 4.39 (m, 1H), 2.76 (m, 2H), 1.99 – 1.84 (m, 1H), 1.84 – 1.66 (m, 1H), 1.30 (dd, *J* = 23.8, 6.2 Hz, 3H) ppm; <sup>19</sup>F NMR (377 MHz, CDCl<sub>3</sub>) δ -172.92 – -173.56 (m), -179.11 (ddd, *J* = 48.1, 30.0, 18.3 Hz), -180.85 – -181.26 (m) ppm. HRMS (EI) (*m/z*) [*M*]<sup>+</sup>: exact mass calc. for C<sub>11</sub>H<sub>12</sub>FN: 177.0954, found: 177.0953.

The data are consistent with our published literature.<sup>1</sup>

### 4-Fluoropentyl benzoate (2j)

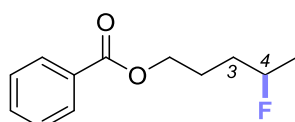



Prepared according to the **General Procedure A** (4F:3F=4:1 ratio). Yield: 36.0 mg, 85%; colorless oil;  $^1\text{H}$  NMR (400 MHz,  $\text{CDCl}_3$ )  $\delta$  8.04 (d,  $J = 7.7$  Hz, 53H), 7.56 (t,  $J = 7.4$  Hz, 27H), 7.44 (t,  $J = 7.7$  Hz, 55H), 4.87 – 4.44 (m, 30H), 4.43 – 4.28 (m, 54H), 2.19 – 1.50 (m, 121H), 1.36 (dd,  $J = 23.8, 6.2$  Hz, 73H), 1.01 (t,  $J = 7.4$  Hz, 4H) ppm;  $^{19}\text{F}$  NMR (377 MHz,  $\text{CDCl}_3$ )  $\delta$  -172.1 – -172.7 (m), -183.3 – -183.8 (m) ppm. HRMS (+APCI) ( $m/z$ ) [ $\text{M}+\text{H}$ ] $^+$ : exact mass calc. for  $\text{C}_{12}\text{H}_{15}\text{FO}_2$ : 211.1129, found: 211.1130.

The data are consistent with our published literature.<sup>1</sup>

### 5-Fluorohexyl propionate (2a)

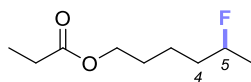

Prepared according to the **General Procedure A** (4F:5F=1:3 ratio). Yield: 31.0 mg, 88%; colorless oil;  $^1\text{H}$  NMR (400 MHz,  $\text{CDCl}_3$ )  $\delta$  4.75 – 4.32 (m, 1H), 4.07 (t,  $J = 6.6$  Hz, 2H), 2.31 (q,  $J = 7.6$  Hz, 2H), 1.87 – 1.37 (m, 6H), 1.31 (dd,  $J = 23.9, 6.2$  Hz, 2.3H), 1.13 (t,  $J = 7.6$  Hz, 3H), 0.96 (t,  $J = 7.5$  Hz, 0.7H) ppm;  $^{19}\text{F}$  NMR (376 MHz,  $\text{CDCl}_3$ )  $\delta$  -173.1 – -173.8 (m), -182.3 – -183.0 (m). HRMS (+APCI) ( $m/z$ ) [ $\text{M}+\text{NH}_4$ ] $^+$ : exact mass calc. for  $\text{C}_9\text{H}_{17}\text{FO}_2$ : 194.1551, found: 194.1552.

The data are consistent with our published literature.<sup>1</sup>

### 4-fluoro-4-phenylbutyl acetate (2k)

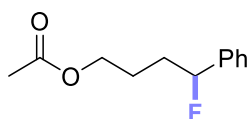

Prepared according to the **General Procedure A**. Yield: 33.6 mg, 80%; colorless oil;  $^1\text{H}$  NMR (400 MHz,  $\text{CDCl}_3$ )  $\delta$  7.38 – 7.20 (m, 5H), 5.40 (ddd,  $J = 47.7, 8.2, 4.4$  Hz, 1H), 4.12 – 3.96 (m, 2H), 1.98 – 1.95 (m, 3H), 1.97 – 1.60 (m, 4H) ppm;  $^{19}\text{F}$  NMR (377 MHz,  $\text{CDCl}_3$ )  $\delta$  -175.9 – -176.4 (m) ppm. HRMS (EI) ( $m/z$ ) [ $\text{M}$ ] $^+$ : exact mass calc. for  $\text{C}_{12}\text{H}_{15}\text{FO}_2$ : 210.1056, found: 210.1057.

The data are consistent with our published literature.<sup>1</sup>

### 2-Fluoro-2-phenylethyl acetate (2l)

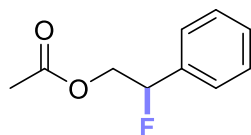

Prepared according to the **General Procedure A**. Yield: 13.0 mg, 36%; colorless oil;  $^1\text{H}$  NMR (400 MHz,  $\text{CDCl}_3$ )  $\delta$  7.50 – 7.31 (m, 5H), 5.81 – 5.51 (m, 1H), 4.50 – 4.30 (m, 2H), 2.11 (s, 3H) ppm;  $^{19}\text{F}$  NMR (377 MHz,  $\text{CDCl}_3$ )  $\delta$  -182.67 – -183.07 (m) ppm. HRMS (+APCI) ( $m/z$ ) [ $\text{M}+\text{NH}_4$ ] $^+$ : exact mass calc. for  $\text{C}_{10}\text{H}_{11}\text{FO}_2$ : 200.1081, found: 200.1082.

The data are consistent with our published literature.<sup>1</sup>

### Methyl 2-(4-(1-fluoro-2-methylpropyl)phenyl)propanoate (2m)

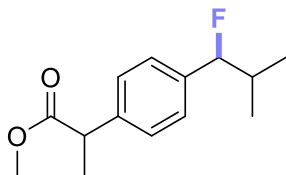

Prepared according to the **General Procedure A**. Yield: 28.6 mg, 60%; colorless oil;  $^1\text{H}$  NMR (400 MHz,  $\text{CDCl}_3$ )  $\delta$  7.35 – 7.19 (m, 5H), 5.08 (dd,  $J = 47.0, 6.8$  Hz, 1H), 3.73 (q,  $J = 7.2$  Hz, 1H), 3.66 (s, 3H), 2.21 – 1.94 (m, 1H), 1.50 (d,  $J = 7.2$  Hz, 3H), 1.02 (d,  $J = 6.6$  Hz, 3H), 0.85 (d,  $J = 6.9$  Hz, 3H) ppm;  $^{19}\text{F}$  NMR (377 MHz,  $\text{CDCl}_3$ )  $\delta$  -180.1 (ddd,  $J = 47.0, 17.1, 8.0$  Hz) ppm. HRMS (EI) ( $m/z$ ) [ $\text{M}$ ] $^+$ : exact mass calc. for  $\text{C}_{14}\text{H}_{19}\text{FO}_2$ : 238.1369, found: 238.1368.

The data are consistent with our published literature.<sup>1</sup>

**(3a*R*,9a*S*,9b*R*)-8-Fluoro-3a,6,6,9a-tetramethyldecahydronaphtho[2,1-*b*]furan-2(1*H*)-one (2o)**

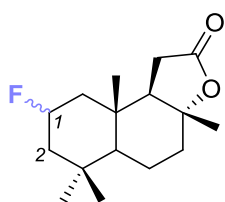

Prepared according to the **General Procedure A**. Yield: 45.6 mg, 84%; white solid, m.p. 118-120 °C;  $^1\text{H}$  NMR (400 MHz,  $\text{CDCl}_3$ )  $\delta$  5.00 – 4.11 (m, 1H), 2.51 – 2.33 (m, 1H), 2.22 (dddd,  $J = 10.2, 8.0, 5.7, 1.9$  Hz, 1H), 2.12 – 2.00 (m, 2H), 2.00 – 1.88 (m, 3H), 1.88 – 1.78 (m, 1H), 1.66 (t,  $J = 12.3$  Hz, 1H), 1.56 – 1.40 (m, 1H), 1.29 (t,  $J = 3.9$  Hz, 5H), 1.11 (dd,  $J = 21.8, 11.8$  Hz, 2H), 0.96 (s, 3H), 0.92 (s, 3H), 0.86 (s, 3H), 0.81 (s, 1H) ppm;  $^{19}\text{F}$  NMR (377 MHz,  $\text{CDCl}_3$ )  $\delta$  -178.6 (dtt,  $J = 48.1, 11.1, 5.6$  Hz), -186.6 – -187.8 (m) ppm. HRMS (ESI) ( $m/z$ ) [ $\text{M}+\text{H}$ ] $^+$ : exact mass calc. for  $\text{C}_{16}\text{H}_{25}\text{FO}_2$ : 269.1911, found: 269.1913.

The data are consistent with our published literature.<sup>1</sup>

**Methyl (4*R*)-4-((5*S*,8*S*,9*S*,10*S*,13*R*,14*S*,17*R*)-1-fluoro-10,13-dimethyl-3,7,12-trioxohexadecahydro-1*H*-cyclopenta[*a*]phenanthren-17-yl)pentanoate (2p)**

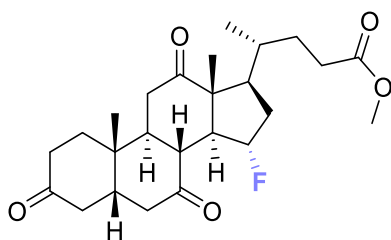

Prepared according to the **General Procedure A**. Yield: 67.0 mg, 77%; white solid, m.p. 133-134 °C;  $^1\text{H}$  NMR (400 MHz,  $\text{CDCl}_3$ )  $\delta$  5.01 – 4.75 (m, 1H), 3.64 (s, 3H), 3.11 (t,  $J = 11.7$  Hz, 1H), 2.93 (dd,  $J = 13.0, 5.8$  Hz, 1H), 2.78 (t,  $J = 12.8$  Hz, 1H), 2.38 – 2.33 (m, 2H), 2.32 – 2.24 (m, 3H), 2.25 – 2.18 (m, 5H), 2.14 (dd,  $J = 7.1, 5.2$  Hz, 2H), 2.08 (dd,  $J = 13.1, 2.9$  Hz, 1H), 1.92 (ddd,  $J = 18.7, 9.2, 5.1$  Hz, 2H), 1.84 – 1.76 (m, 1H), 1.60 (td,  $J = 14.1, 5.2$  Hz, 1H), 1.42 – 1.34 (m, 4H), 1.31 – 1.22 (m, 1H), 1.08 (s, 3H), 0.81 (d,  $J = 6.6$  Hz, 3H) ppm;  $^{19}\text{F}$  NMR (377 MHz,  $\text{CDCl}_3$ )  $\delta$  -169.2 – -169.7 (m). HRMS (ESI) ( $m/z$ ) [ $\text{M}+\text{H}$ ] $^+$ : exact mass calc. for  $\text{C}_{25}\text{H}_{35}\text{FO}_5$ : 435.2541, found: 435.2545.

The data are consistent with our published literature.<sup>1</sup>

### (2R,5R)-2-(2-fluoropropan-2-yl)-5-methylcyclohexan-1-one (2q)

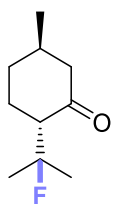

Prepared according to the **General Procedure A**. Yield: 26.0 mg, 75%; colorless oil; <sup>1</sup>H NMR (400 MHz, CDCl<sub>3</sub>) δ 2.66 – 2.57 (m, 1H), 2.35 – 2.27 (m, 2H), 1.60 – 1.50 (m, 1H), 1.46 (d, *J* = 23.5 Hz, 3H), 1.42 – 1.31 (m, 6H), 1.01 (d, *J* = 6.3 Hz, 3H), 0.99 – 0.97 (m, 1H) ppm; <sup>13</sup>C NMR (101 MHz, CDCl<sub>3</sub>) δ 209.5 (d, *J* = 10.7 Hz), 95.8 (d, *J* = 164.5 Hz), 58.8 (d, *J* = 22.7 Hz), 51.6 (d, *J* = 3.9 Hz), 36.0 (s), 33.8 (s), 27.8 (d, *J* = 4.8 Hz), 27.0 (d, *J* = 23.4 Hz), 22.4 (d, *J* = 23.2 Hz), 22.3 (s) ppm; <sup>19</sup>F NMR (377 MHz, CDCl<sub>3</sub>) δ -134.5 (heptd, *J* = 23.8, 8.2 Hz) ppm; HRMS (EI) (*m/z*) [*M*]<sup>+</sup>: exact mass calc. for C<sub>10</sub>H<sub>17</sub>FO: 172.1263; found: 172.1265.

The data are consistent with the literature.<sup>2b</sup>

### 3-Fluoro-2,3-dihydro-1*H*-inden-1-one (2r)

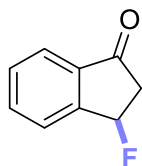

Prepared according to the **General Procedure A**. Yield: 21.0 mg, 70%; colorless oil; <sup>1</sup>H NMR (400 MHz, CD<sub>3</sub>CN) δ 7.82 – 7.71 (m, 3H), 7.60 – 7.55 (m, 1H), 6.18 (ddd, *J* = 55.4, 6.6, 1.9 Hz, 1H), 3.12 (ddd, *J* = 19.0, 12.3, 6.6 Hz, 1H), 2.88 (ddd, *J* = 23.9, 19.2, 2.2 Hz, 1H) ppm; <sup>13</sup>C NMR (101 MHz, CD<sub>3</sub>CN) δ 195.9 (d, *J* = 1.5 Hz), 144.9 (d, *J* = 17.6 Hz), 130.1 (d, *J* = 2.8 Hz), 125.5 (d, *J* = 3.2 Hz), 121.4 (d, *J* = 1.8 Hz), 118.1 (d, *J* = 1.7 Hz), 82.7 (d, *J* = 177.6 Hz), 38.7 (d, *J* = 21.1 Hz) ppm; <sup>19</sup>F NMR (377 MHz, CD<sub>3</sub>CN) δ -172.7 (ddd, *J* = 55.5, 23.9, 12.3 Hz) ppm. HRMS (EI) (*m/z*) [*M*]<sup>+</sup>: exact mass calc. for C<sub>9</sub>H<sub>7</sub>FO: 150.0481; found: 150.0483.

The data are consistent with our published literature.<sup>1</sup>

### Fluorinated 4-butylacetophenone (2t)

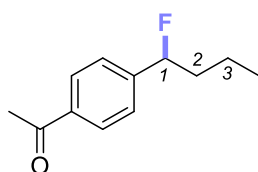

Prepared according to the **General Procedure A** (1F:3F:2F=3.6:2:1). Yield: 25.0 mg, 65%; colorless oil; <sup>1</sup>H NMR (400 MHz, CDCl<sub>3</sub>) δ 7.96 (d, *J* = 8.0 Hz, 2H), 7.41 (d, *J* = 8.5 Hz, 2H), 5.50 (ddd, *J* = 47.9, 8.1, 4.7 Hz, 1H), 2.61 (s, 3H), 1.88 – 1.74 (m, 2H), 1.55 – 1.40 (m, 2H), 0.96 (t, *J* = 7.4 Hz, 3H) ppm; <sup>13</sup>C NMR (101 MHz, CDCl<sub>3</sub>) δ 197.7 (s), 145.8 (d, *J* = 19.9 Hz), 136.7 (d, *J* = 1.5 Hz), 128.5 (s), 125.4 (d, *J* = 7.3 Hz), 93.7 (d, *J* = 172.0 Hz), 39.3 (d, *J* = 23.0 Hz), 26.7 (s), 18.2 (d, *J* = 4.4 Hz), 13.8 (s) ppm; <sup>19</sup>F NMR (377 MHz,

CDCl<sub>3</sub>) δ -179.4 (ddd, *J* = 47.6, 29.2, 18.1 Hz) ppm; HRMS (EI) (*m/z*) [*M*]<sup>+</sup>: exact mass calc. for C<sub>12</sub>H<sub>15</sub>FO: 194.1107; found: 194.1105.

The data are consistent with the literature.<sup>6</sup>

### Fluorinated 4-butylacetophenone (2u)

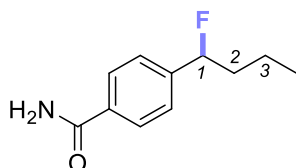

Prepared according to the **General Procedure A** (1F:3F:2F=5:2:1). This compound was not isolated but its identity confirmed by comparison with published literature.<sup>1</sup> NMR yield: 91% (according to <sup>19</sup>F NMR with pentafluorobenzene as an internal standard); <sup>19</sup>F NMR (377 MHz, CD<sub>3</sub>CN) δ -172.35 – -172.88 (m), -174.74 – -175.20 (m), -175.76 – -176.07 (m) ppm; HRMS (EI) (*m/z*) [*M*]<sup>+</sup>: exact mass calc. for C<sub>11</sub>H<sub>14</sub>FNO: 195.1059; found: 195.1057.

The data are consistent with our published literature.<sup>1</sup>

### Fluorinated hexanone-2 (2v)

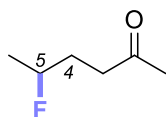

Prepared according to the **General Procedure A** (5F:4F=1.3:1). This compound was not isolated but its identity confirmed by comparison with published literature.<sup>2b</sup> NMR yield: 92% (according to <sup>19</sup>F NMR with pentafluorobenzene as an internal standard); Isolated yield: 74% (due to high volatility); <sup>1</sup>H NMR (600 MHz, CDCl<sub>3</sub>) δ 4.89 (dddd, *J* = 16.1, 12.2, 8.1, 4.6 Hz, 0.4H), 4.72 – 4.58 (m, 0.6H), 2.66 – 2.50 (m, 2H), 2.20 (s, 1.5H), 2.16 (s, 2H), 1.88 – 1.74 (m, 1H), 1.74 – 1.60 (m, 1H), 1.36 – 1.24 (m, 3H) ppm; <sup>13</sup>C NMR (151 MHz, CDCl<sub>3</sub>) δ 208.0 (s), 205.8 (d, *J* = 3.8 Hz), 90.7 (t, *J* = 167.0 Hz), 60.4 (s), 48.4 (d, *J* = 22.9 Hz), 38.9 (d, *J* = 3.6 Hz), 30.9 (d, *J* = 1.1 Hz), 30.7 (d, *J* = 21.0 Hz), 30.0 (s), 28.1 (d, *J* = 21.2 Hz), 21.1 (s), 21.1 (s), 21.0 (s), 9.2 (d, *J* = 5.6 Hz) ppm; <sup>19</sup>F NMR (377 MHz, CDCl<sub>3</sub>) δ -176.1 – -176.8 (m), -182.1 – -182.7 (m) ppm; HRMS (EI) (*m/z*) [*M*]<sup>+</sup>: exact mass calc. for C<sub>6</sub>H<sub>11</sub>FO: 118.0794; found: 118.0798.

The data are consistent with the literature.<sup>2b</sup>

### 1-((1*r*,3*s*,5*R*,7*S*)-3-Fluoroadamantan-1-yl)ethan-1-one (2x)

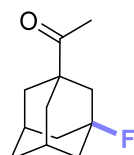

Prepared according to the **General Procedure A**. Yield: 29.0 mg, 74%; white solid, m.p. 59-61 °C; <sup>1</sup>H NMR (400 MHz, CDCl<sub>3</sub>) δ 2.28 (m, 2H), 2.03 (s, 3H), 1.83 (d, *J* = 5.9 Hz, 2H), 1.78 (m, 4H), 1.69 – 1.57 (m, 4H), 1.55 – 1.48 (m, 2H) ppm; <sup>19</sup>F NMR (377 MHz, CDCl<sub>3</sub>) δ -132.50 (br. s). HRMS (EI) (*m/z*) [*M*]<sup>+</sup>: exact mass calc. for C<sub>12</sub>H<sub>17</sub>FO: 196.1263, found: 196.1260.

The data are consistent with our published literature.<sup>1</sup>

## 1-((1*r*,3*R*,5*S*,7*r*)-3,5-difluoroadamantan-1-yl)ethan-1-one (**2y**)

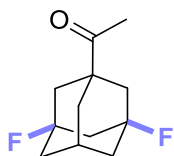

Prepared according to the **General Procedure A**. Yield: 30.0 mg, 70%; white solid, m.p. 51-53 °C; IR (neat)  $\nu$  (cm<sup>-1</sup>): 2922, 2870, 1703, 1457, 1357, 1334, 1245, 1211, 1114, 1086, 995, 947, 861, 824, 772; <sup>1</sup>H NMR (400 MHz, CDCl<sub>3</sub>)  $\delta$  2.58 – 2.51 (m, 1H), 2.14 (s, 3H), 2.09 (t, *J* = 5.5 Hz, 2H), 1.90 (t, *J* = 3.6 Hz, 4H), 1.86 – 1.77 (m, 4H), 1.62 (br. s, 2H) ppm; <sup>13</sup>C NMR (101 MHz, CDCl<sub>3</sub>)  $\delta$  209.0 (t, *J* = 1.8 Hz), 94.0 (d, *J* = 13.7 Hz), 92.1 (d, *J* = 13.7 Hz), 51.6 (t, *J* = 9.4 Hz), 47.4 (t, *J* = 19.1 Hz), 42.2 (dt, *J* = 11.3, 6.6 Hz), 40.5 (dt, *J* = 11.0, 7.0 Hz), 35.9 (t, *J* = 1.9 Hz), 30.6 (t, *J* = 10.5 Hz), 24.8 (s) ppm; <sup>19</sup>F NMR (377 MHz, CDCl<sub>3</sub>)  $\delta$  -137.2 (s) ppm; HRMS (EI) (*m/z*) [*M*]<sup>+</sup>: exact mass calc. for C<sub>12</sub>H<sub>16</sub>F<sub>2</sub>O: 214.1169; found: 214.1171.

### 3 Mechanistic Studies

#### 3.1 Radical Trapping

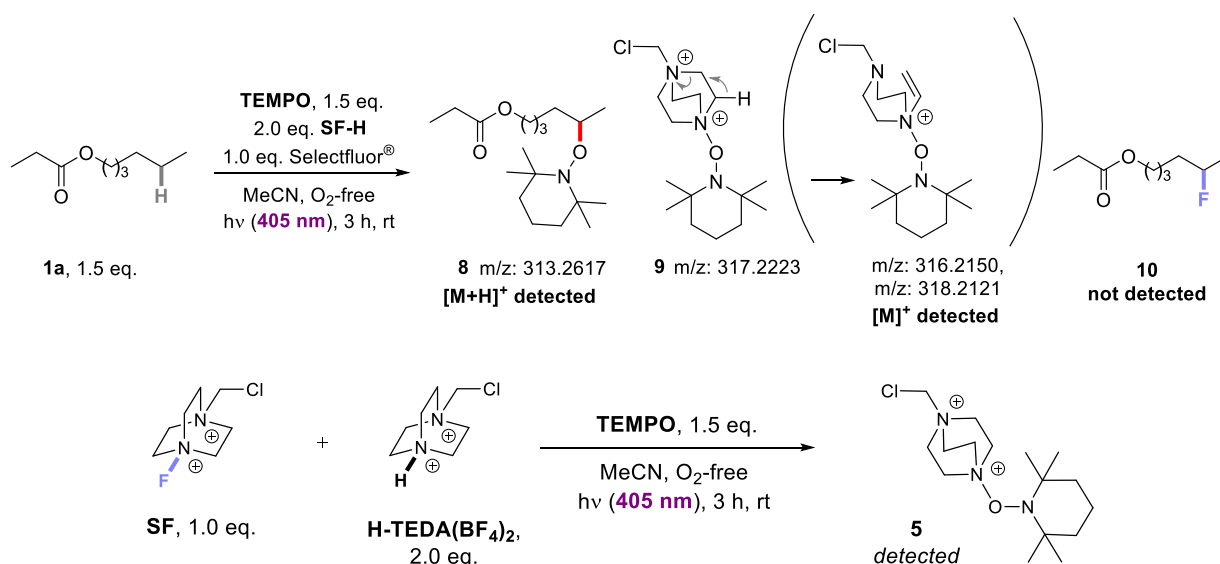

**Scheme S10.** Radical trapping reactions with TEMPO. **Top:** with **1a**. **Bottom:** in absence of **1a**.

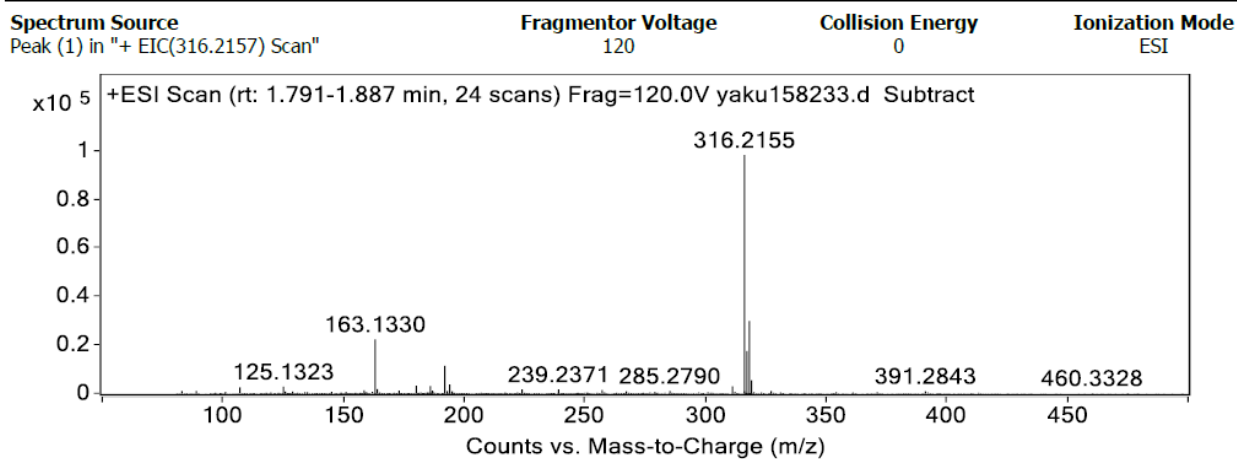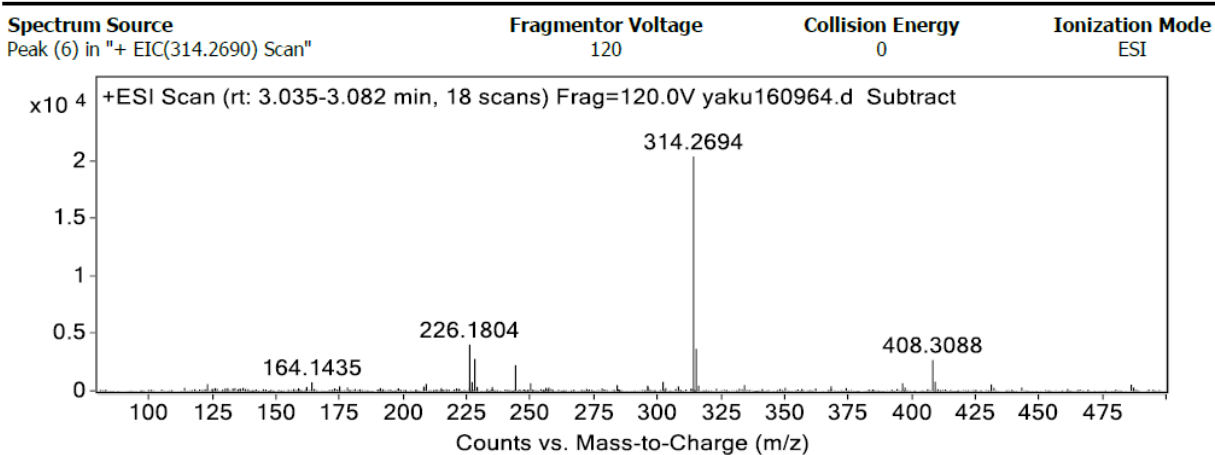

**Figure S6.** Mass spectra for TEMPO-trapped radicals from LC-MS analysis.

### 3.2 UV-visible Spectroscopy Studies

We elected to measure UV-vis absorption spectra of individual reaction components both separately and as reaction mixtures (Figure S7). As can be seen below, under these conditions the absorption of the reaction mixture resembled to that of **H-TEDA(BF<sub>4</sub>)<sub>2</sub>**. Due to the limited solubility of **H-TEDA(BF<sub>4</sub>)<sub>2</sub>**, we were not able to measure the UV-vis of the reaction mixture with increasing **H-TEDA(BF<sub>4</sub>)<sub>2</sub>** concentration.

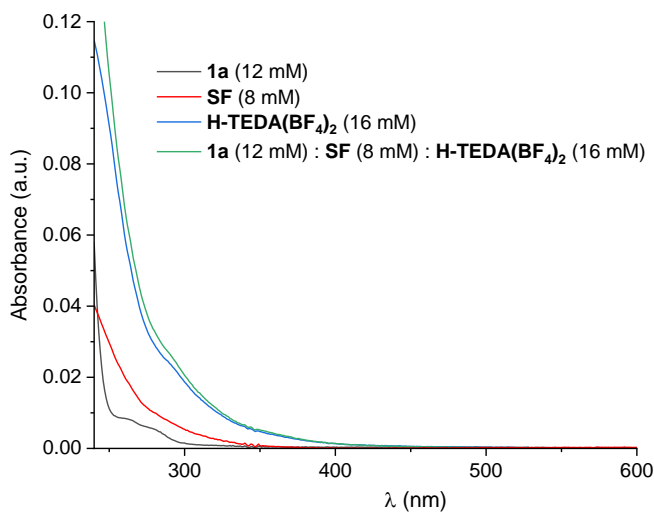

**Figure S7.** UV-vis spectra of separate reaction components and reaction mixture.

We chose TFA as another additive that proved effective in fluorination reactions, as it is well soluble in acetonitrile. We measured UV-vis of TFA and **SF** both separately and as mixture of both. It was observed that with increasing concentration of TFA, a new absorption peak emerged ( $\lambda_{\max} = 358$  nm) tailing into <400nm, that was notably higher than any individual reaction component. With increasing TFA concentration, the absorption was increased.

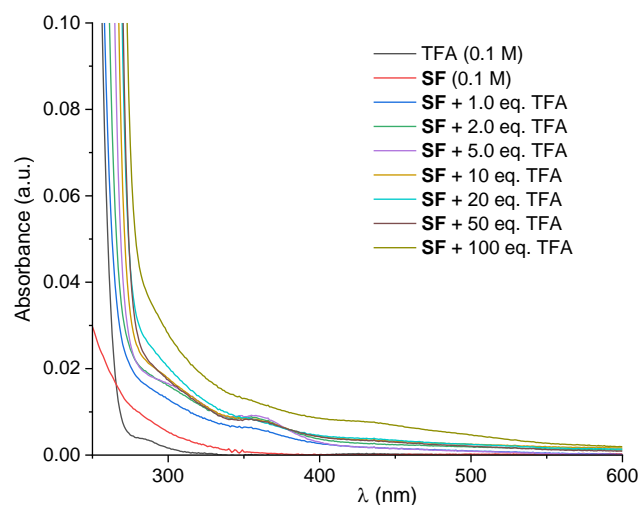

**Figure S8.** UV-vis spectra of TFA, **SF**, and **SF** with increasing concentrations of TFA.

We also measured UV-vis of TFA, substrate **1a** and **SF** both separately and as reaction mixture with increasing TFA concentration. In this case, it was also observed that with increasing concentration of TFA in the reaction mixture, a new absorption peak emerged ( $\lambda_{\max} = 355$  nm) tailing into <400nm. This absorption peak was notably higher than any individual reaction component, and with increasing TFA concentration, this absorption peak also increased.

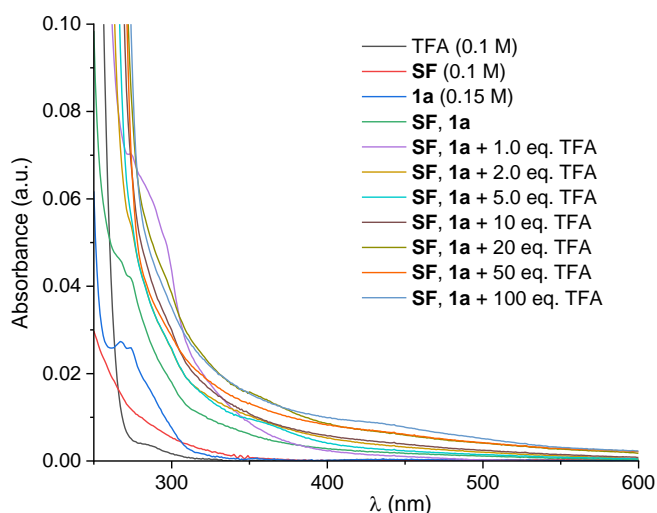

**Figure S9.** UV-vis spectra of TFA, **SF**, substrate **1a**, and **SF+1a** with increasing concentrations of TFA.

### 3.3 Luminescence Measurements

To gain more insight about an interaction between **SF** and **H-TEDA(BF<sub>4</sub>)<sub>2</sub>** and their excited state deactivation, steady-state luminescence measurement was carried out. We measured luminescence of **SF** and **H-TEDA(BF<sub>4</sub>)<sub>2</sub>** both as an individual component and as their mixtures of different ratios.

For steady-state luminescence measurements, a 15 mM concentration of **SF** and 15 mM concentration of **H-TEDA(BF<sub>4</sub>)<sub>2</sub>** were used. Spectroscopic concentrations had to be kept lower than reaction concentrations to i) ensure full solubility of **SF**, and ii) ensure that luminescence-derived photon counts did not saturate the detector.

We wanted to know the photostability of **SF** and **H-TEDA(BF<sub>4</sub>)<sub>2</sub>**. On its own, **SF** (15 mM) displayed a slight decrease in emission intensity after 5 min interval, and this continued to decrease with repeated measurements every 5 min until 20 min (Table S5, Figure S10). The same kind of decrease in emission intensity was observed when measuring **H-TEDA(BF<sub>4</sub>)<sub>2</sub>**, on its own, successively every 5 min until 20 min (Table S6, Figure S11).

Steady-state luminescence of **SF** with increasing **H-TEDA(BF<sub>4</sub>)<sub>2</sub>** concentration and **H-TEDA(BF<sub>4</sub>)<sub>2</sub>** with increasing **SF** concentration were measured. All of the samples prepared, were measured repeatedly 4-5 times over 5 min interval.

**Note:** The sharp peak at  $\lambda = 416$  nm is an instrumental artefact.

**Table S5.** Steady state luminescence measurement of **SF** (15 mM) over time, see Figure S10, right.

| Entry | Time (min) | Intensity at 467 nm (CPS) | Ln[Emission intensity] at 467 nm |
|-------|------------|---------------------------|----------------------------------|
| 1     | 0          | 21947                     | 9.99639                          |
| 2     | 5          | 20837                     | 9.94449                          |
| 3     | 10         | 20434                     | 9.92496                          |
| 4     | 15         | 20152                     | 9.91106                          |
| 5     | 20         | 19858                     | 9.89636                          |

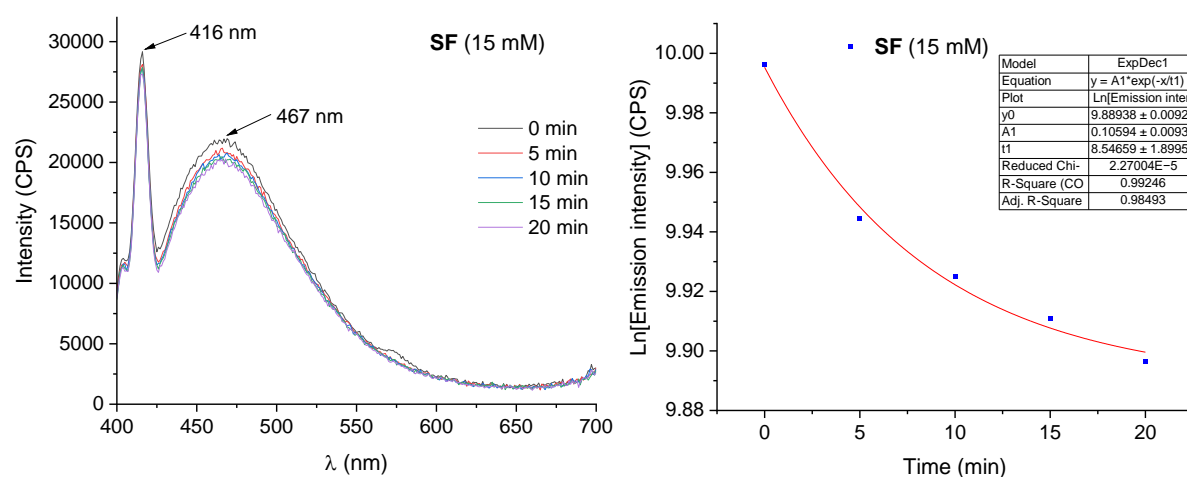

**Figure S10.** **SF** photostability (left) and  $\lambda_{\max} = 467$  nm peak height (right) measured repeatedly over time.

**Table S6.** Steady state luminescence measurement of **H-TEDA(BF<sub>4</sub>)<sub>2</sub>** (15 mM) over time, see Figure S11, right.

| Entry | Time (min) | Intensity at 452 nm | Ln[Emission intensity] at 452 nm |
|-------|------------|---------------------|----------------------------------|
|-------|------------|---------------------|----------------------------------|



|   |    |       |          |
|---|----|-------|----------|
| 1 | 0  | 41807 | 10.64082 |
| 2 | 5  | 38659 | 10.56253 |
| 3 | 10 | 38198 | 10.55054 |
| 4 | 15 | 37492 | 10.53188 |
| 5 | 20 | 37322 | 10.52734 |

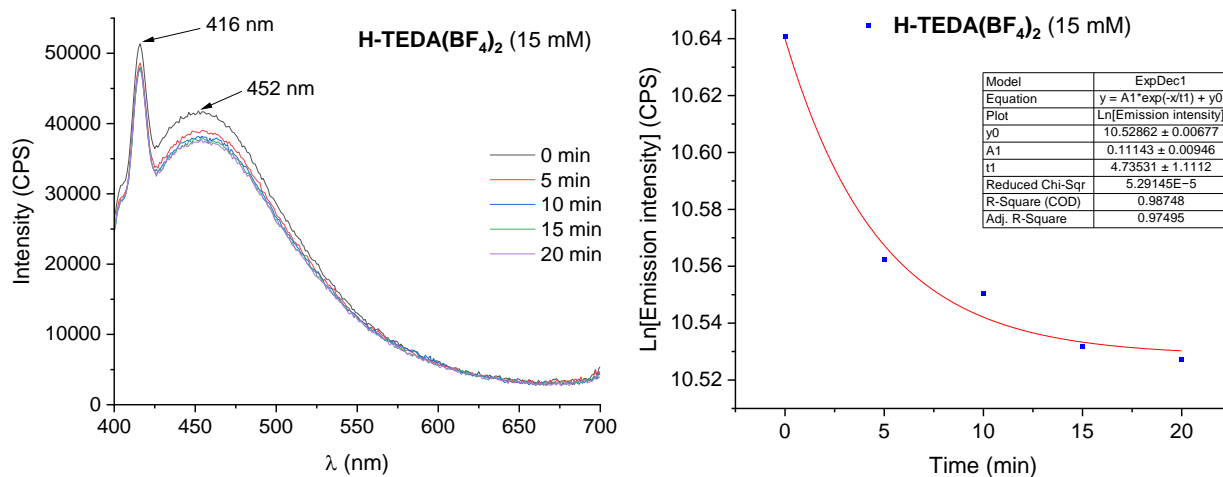

**Figure S11.** H-TEDA(BF<sub>4</sub>)<sub>2</sub> photostability (left) and  $\lambda_{\text{max}} = 452$  nm peak height (right) measured repeatedly over time.

**Table S7.** Steady state luminescence measurement of the mixture of 1 : 1 ratio of SF (10 mM) and H-TEDA(BF<sub>4</sub>)<sub>2</sub> (10 mM) over time, see Figure S12, right.

| Entry           | SF : H-TEDA(BF <sub>4</sub> ) <sub>2</sub> (10 mM : 10 mM) | Intensity at 463 nm | $\text{Ln}[\text{Emission intensity}]$ at 463 nm |
|-----------------|------------------------------------------------------------|---------------------|--------------------------------------------------|
| Over time (min) |                                                            |                     |                                                  |
| 1               | 0                                                          | 51588               | 10.85104                                         |
| 2               | 5                                                          | 47674               | 10.77214                                         |
| 3               | 10                                                         | 45656               | 10.72889                                         |
| 4               | 15                                                         | 44628               | 10.70612                                         |

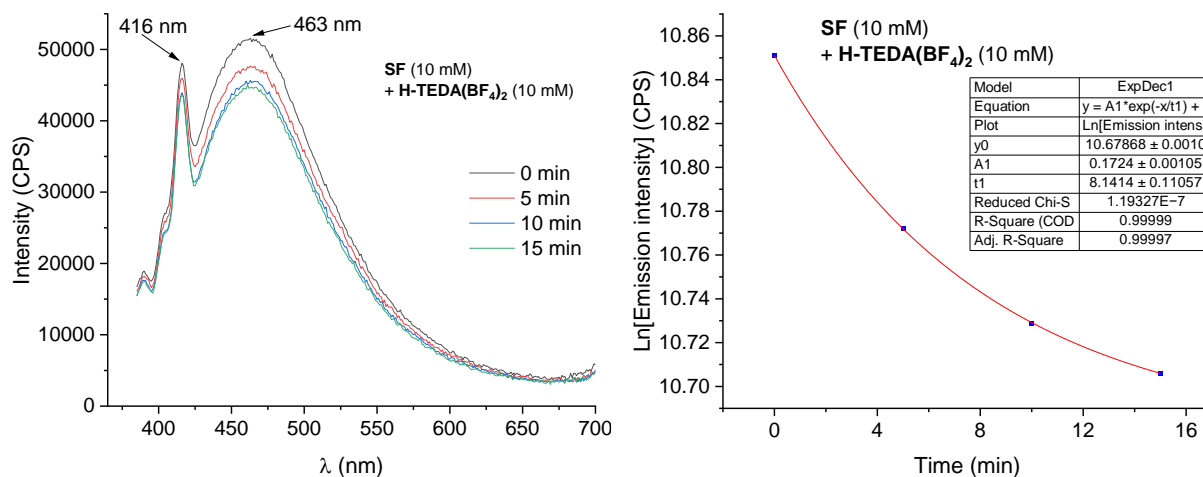

**Figure S12.** Emission of the mixture of 1 : 1 ratio of **SF** (10 mM) and **H-TEDA(BF<sub>4</sub>)<sub>2</sub>** (10 mM) (left) and peak height at  $\lambda_{\text{max}} = 463$  nm over time.

**Table S8.** Steady state luminescence measurement of the mixture of 1 : 2 ratio of **SF** (10 mM) and **H-TEDA(BF<sub>4</sub>)<sub>2</sub>** (20 mM) over time, see Figure S13, right.

| Entry           | <b>SF</b> : <b>H-TEDA(BF<sub>4</sub>)<sub>2</sub></b><br>(10 mM : 20 mM) | Intensity at 463 nm | $\text{Ln}[\text{Emission intensity}]$<br>at 463 nm |
|-----------------|--------------------------------------------------------------------------|---------------------|-----------------------------------------------------|
| Over time (min) |                                                                          |                     |                                                     |
| 1               | 0                                                                        | 80789               | 11.29960                                            |
| 2               | 5                                                                        | 70834               | 11.16809                                            |
| 3               | 10                                                                       | 67134               | 11.11445                                            |
| 4               | 15                                                                       | 66568               | 11.10598                                            |

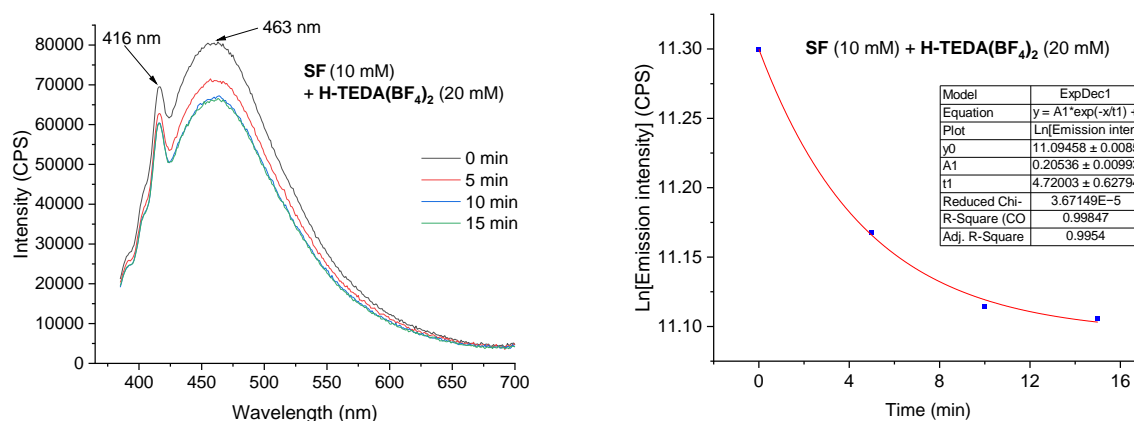

**Figure S13.** Emission of the mixture of 1 : 2 ratio of **SF** (10 mM) and **H-TEDA(BF<sub>4</sub>)<sub>2</sub>** (20 mM) (left) and  $\lambda_{\text{max}} = 463$  nm peak height (right) measured repeatedly over time.

**Table S9.** Steady state luminescence measurement of the mixture of 1 : 4 ratio of **SF** (10 mM) and **H-TEDA(BF<sub>4</sub>)<sub>2</sub>** (40 mM) over time, see Figure S14, right.

| Entry           | SF : H-TEDA(BF <sub>4</sub> ) <sub>2</sub> (10 mM : 40 mM) | Intensity at 467 nm | Ln[Emission intensity] at 467 nm |
|-----------------|------------------------------------------------------------|---------------------|----------------------------------|
| Over time (min) |                                                            |                     |                                  |
| 1               | 0                                                          | 129410              | 11.77074                         |
| 2               | 5                                                          | 118443              | 11.68219                         |
| 3               | 10                                                         | 107796              | 11.58800                         |
| 4               | 15                                                         | 104552              | 11.55744                         |

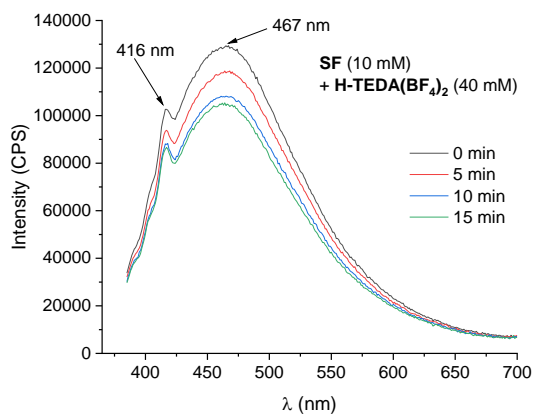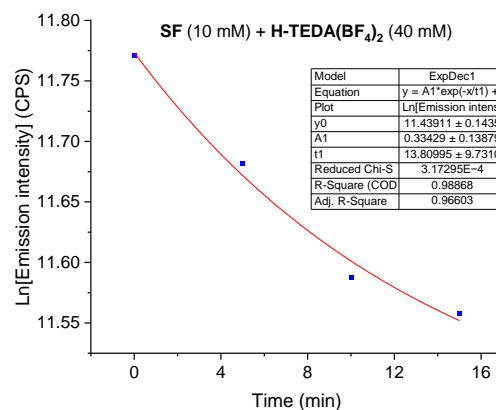

**Figure S14.** Emission of the mixture of 1 : 4 ratio of SF (10 mM) and H-TEDA(BF<sub>4</sub>)<sub>2</sub> (40 mM) (left) and  $\lambda_{\max}$  = 467 nm peak height (right) measured repeatedly over time.

**Table S10.** Steady state luminescence measurement of the mixture of 1 : 8 ratio of SF (5 mM) and H-TEDA(BF<sub>4</sub>)<sub>2</sub> (40 mM) over time, see Figure S15, right.

| Entry           | SF : H-TEDA(BF <sub>4</sub> ) <sub>2</sub> (5 mM : 40 mM) | Intensity at 463 nm | Ln[Emission intensity] at 463 nm |
|-----------------|-----------------------------------------------------------|---------------------|----------------------------------|
| Over time (min) |                                                           |                     |                                  |
| 1               | 0                                                         | 138261              | 11.83690                         |
| 2               | 5                                                         | 122397              | 11.71503                         |
| 3               | 10                                                        | 116862              | 11.66875                         |
| 4               | 15                                                        | 115792              | 11.65955                         |
| 5               | 20                                                        | 115700              | 11.65876                         |

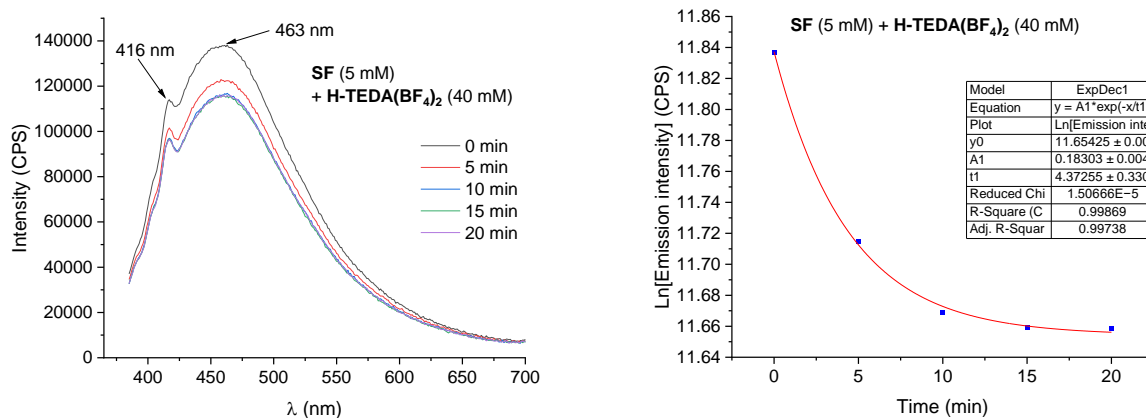

**Figure S15.** Emission of the mixture of 1 : 8 ratio of **SF** (5 mM) and **H-TEDA(BF<sub>4</sub>)<sub>2</sub>** (40 mM) (left) and  $\lambda_{\max}$  = 463 nm peak height (right) measured repeatedly over time.

**Table S11.** Steady state luminescence measurement of the mixture of 1 : 16 ratio of **SF** (2 mM) and **H-TEDA(BF<sub>4</sub>)<sub>2</sub>** (32 mM) over time, see Figure S16, right.

| Entry           | <b>SF</b> : <b>H-TEDA(BF<sub>4</sub>)<sub>2</sub></b> (2 mM : 32 mM) | Intensity at 463 nm | Ln[Emission intensity] at 463 nm |
|-----------------|----------------------------------------------------------------------|---------------------|----------------------------------|
| Over time (min) |                                                                      |                     |                                  |
| 1               | 0                                                                    | 114571              | 11.64895                         |
| 2               | 5                                                                    | 105069              | 11.56237                         |
| 3               | 10                                                                   | 101445              | 11.52727                         |
| 4               | 15                                                                   | 102767              | 11.54022                         |
| 5               | 20                                                                   | 102278              | 11.53545                         |

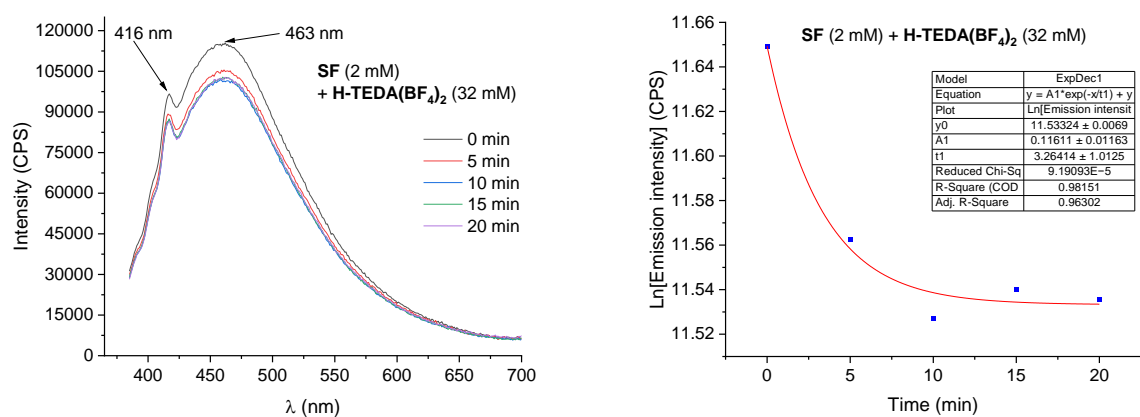

**Figure S16.** Emission of the mixture of 1 : 16 ratio of **SF** (2 mM) and **H-TEDA(BF<sub>4</sub>)<sub>2</sub>** (32 mM) (left) and  $\lambda_{\max}$  = 463 nm peak height (right) measured repeatedly over time.

**Table S12.** Steady state luminescence measurement of the mixture of 2 : 1 ratio of **SF** (20 mM) and **H-TEDA(BF<sub>4</sub>)<sub>2</sub>** (10 mM) over time, see Figure S17, right.

| Entry           | <b>SF : H-TEDA(BF<sub>4</sub>)<sub>2</sub></b><br>(20 mM : 10 mM) | Intensity at 475<br>nm | Ln[Emission intensity] at<br>475 nm |
|-----------------|-------------------------------------------------------------------|------------------------|-------------------------------------|
| Over time (min) |                                                                   |                        |                                     |
| 1               | 0                                                                 | 44699                  | 10.70771                            |
| 2               | 5                                                                 | 39948                  | 10.59533                            |
| 3               | 10                                                                | 34518                  | 10.44924                            |
| 4               | 15                                                                | 33202                  | 10.41037                            |

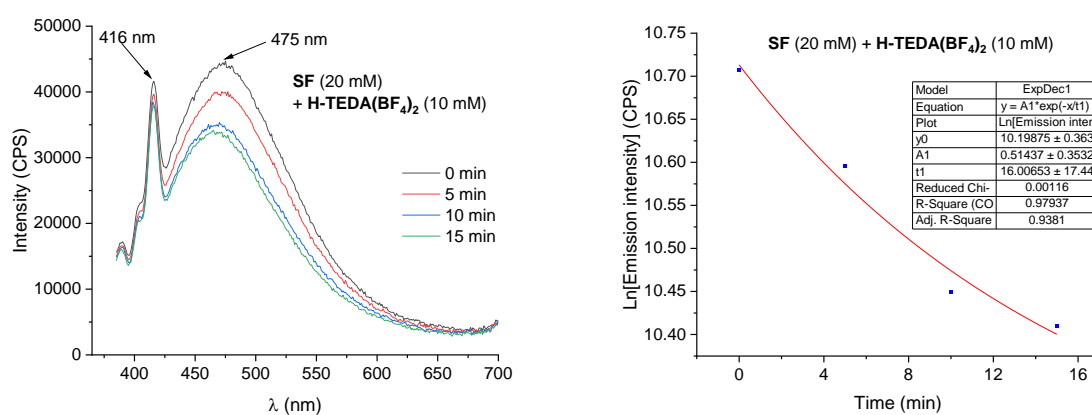

**Figure S17.** Emission of the mixture of 2 : 1 ratio of **SF** (20 mM) and **H-TEDA(BF<sub>4</sub>)<sub>2</sub>** (10 mM) (left) and  $\lambda_{\max}$  = 475 nm peak height (right) measured repeatedly over time.

**Table S13.** Steady state luminescence measurement of the mixture of 4 : 1 ratio of **SF** (40 mM) and **H-TEDA(BF<sub>4</sub>)<sub>2</sub>** (10 mM) over time, see Figure S18, right.

| Entry           | <b>SF : H-TEDA(BF<sub>4</sub>)<sub>2</sub></b><br>(40 mM : 10 mM) | Intensity at 490<br>nm | Ln[Emission intensity] at<br>490 nm |
|-----------------|-------------------------------------------------------------------|------------------------|-------------------------------------|
| Over time (min) |                                                                   |                        |                                     |
| 1               | 0                                                                 | 34266                  | 10.44191                            |
| 2               | 5                                                                 | 24227                  | 10.09522                            |
| 3               | 10                                                                | 21395                  | 9.970913                            |
| 4               | 15                                                                | 18988                  | 9.851562                            |

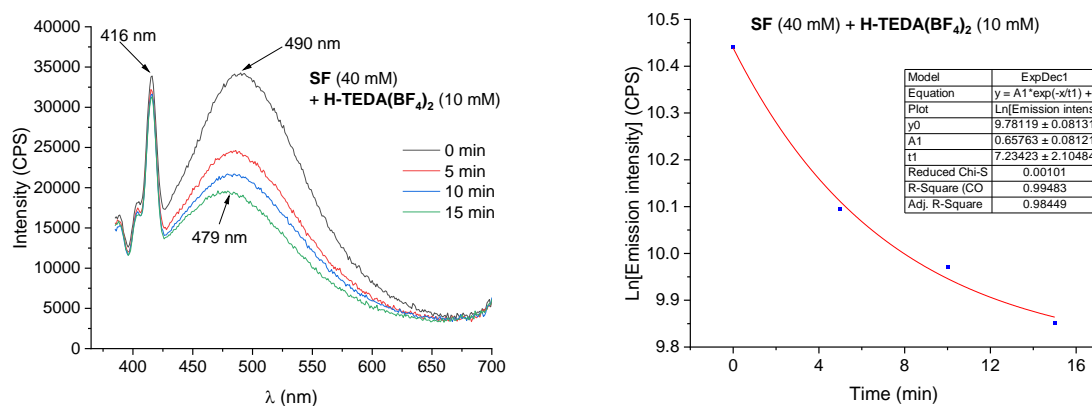

**Figure S18.** Emission of the mixture of 4 : 1 ratio of **SF** (40 mM) and **H-TEDA(BF<sub>4</sub>)<sub>2</sub>** (10 mM) (left) and  $\lambda_{\max}$  = 490 nm peak height (right) measured repeatedly over time.

**Table S14.** Steady state luminescence measurement of the mixture of 8 : 1 ratio of **SF** (80 mM) and **H-TEDA(BF<sub>4</sub>)<sub>2</sub>** (10 mM) over time, see Figure S19, right.

| Entry           | <b>SF</b> : <b>H-TEDA(BF<sub>4</sub>)<sub>2</sub></b><br>(80 mM : 10 mM) | Intensity at 490<br>nm | Ln[Emission intensity] at<br>490 nm |
|-----------------|--------------------------------------------------------------------------|------------------------|-------------------------------------|
| Over time (min) |                                                                          |                        |                                     |
| 1               | 0                                                                        | 10494                  | 9.25856                             |
| 2               | 5                                                                        | 8404                   | 9.03646                             |
| 3               | 10                                                                       | 7408                   | 8.91032                             |
| 4               | 15                                                                       | 6958                   | 8.84765                             |

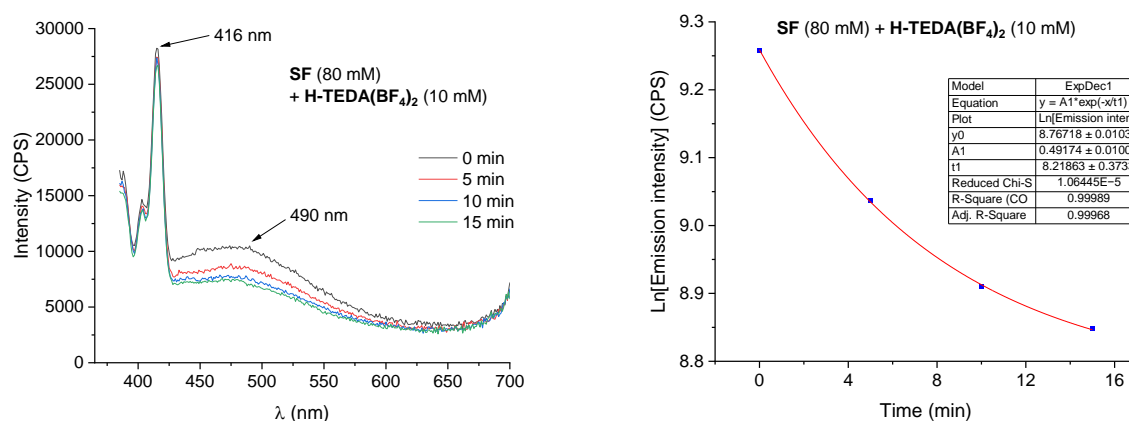

**Figure S19.** Emission of the mixture of 8 : 1 ratio of **SF** (80 mM) and **H-TEDA(BF<sub>4</sub>)<sub>2</sub>** (10 mM) (left) and  $\lambda_{\max}$  = 490 nm peak height (right) measured repeatedly over time.

Steady state luminescence measurement of **H-TEDA(BF<sub>4</sub>)<sub>2</sub>** (10 mM) with increasing [**SF**] (up to 80 mM) was conducted. The emission peak intensity decreased with increasing [**SF**], and this led to bathochromic shift from 463 nm to 490 nm. Steady state luminescence measurement of **SF** (10 mM) with increasing [**H-**

**TEDA(BF<sub>4</sub>)<sub>2</sub>**] (up to 40 mM, due to its limited solubility) was also conducted. The emission peak intensity increased up to 2.7 times with increasing [**H-TEDA(BF<sub>4</sub>)<sub>2</sub>**]. Conversely, this did not lead to a change in wavelength (Figure S20).

**Table S15.** Steady state luminescence measurement of different ratios of **SF** : **H-TEDA(BF<sub>4</sub>)<sub>2</sub>**, see Figure S20, left.

| Entry | <b>SF</b> : <b>H-TEDA(BF<sub>4</sub>)<sub>2</sub></b> ratios and concentrations (mM) | Intensity at 463 nm |
|-------|--------------------------------------------------------------------------------------|---------------------|
| 1     | 1 : 1 (10 mM : 10 mM)                                                                | 51588               |
| 2     | 1 : 2 (10 mM : 20 mM)                                                                | 80789               |
| 3     | 1 : 4 (10 mM : 40 mM)                                                                | 129410              |
| 4     | 1 : 8 (5 mM : 40 mM)                                                                 | 138260              |

**Table S16.** Steady state luminescence measurement of different ratios of **SF** : **H-TEDA(BF<sub>4</sub>)<sub>2</sub>**, see Figure S20, right.

| Entry | <b>SF</b> : <b>H-TEDA(BF<sub>4</sub>)<sub>2</sub></b> ratios and concentrations (mM) | Intensity at 467 nm |
|-------|--------------------------------------------------------------------------------------|---------------------|
| 1     | 1 : 1 (10 mM : 10 mM)                                                                | 51404               |
| 2     | 2 : 1 (20 mM : 10 mM)                                                                | 43597               |
| 3     | 4 : 1 (40 mM : 10 mM)                                                                | 30577               |
| 4     | 8 : 1 (80 mM : 10 mM)                                                                | 10230               |

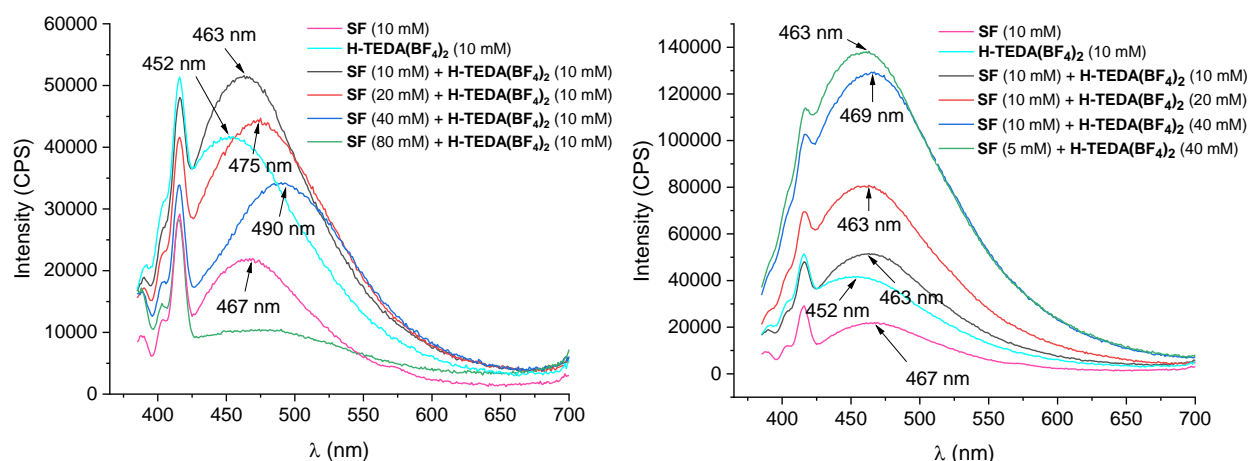

**Figure S20.** Steady state luminescence measurement of **H-TEDA(BF<sub>4</sub>)<sub>2</sub>** (10 mM) with increasing [**SF**] (left) (peak decreases with increasing [**SF**]). Steady state luminescence measurement of **SF** (10 mM) with increasing [**H-TEDA(BF<sub>4</sub>)<sub>2</sub>**] (right) (peak increases with increasing [**H-TEDA(BF<sub>4</sub>)<sub>2</sub>**]).

#### 4 $^1\text{H}$ NMR, $^{13}\text{C}$ NMR and $^{19}\text{F}$ NMR Spectra

$^1\text{H}$  NMR of compound **H-TEDA**( $\text{BF}_4$ )<sub>2</sub> in  $\text{CD}_3\text{CN}$

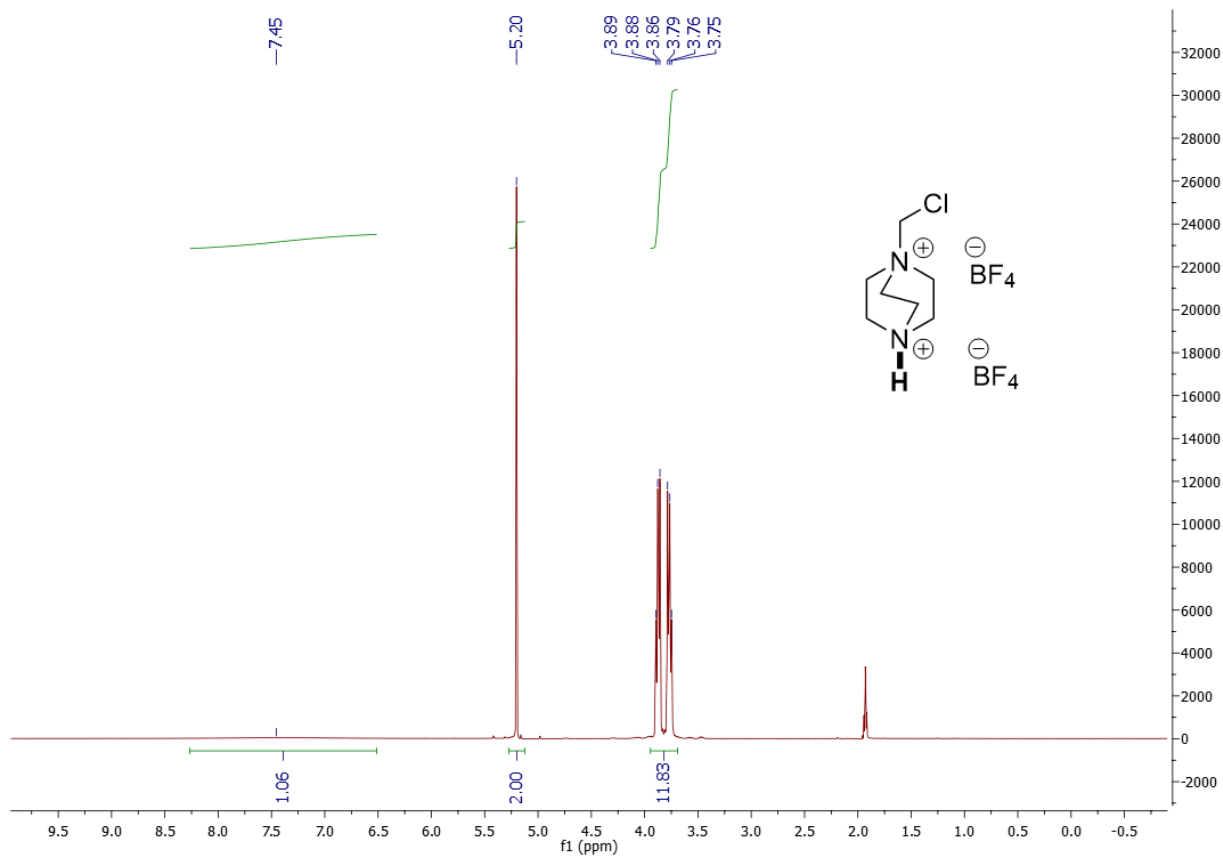

$^{13}\text{C}$  NMR of compound **H-TEDA**( $\text{BF}_4$ )<sub>2</sub> in  $\text{CD}_3\text{CN}$

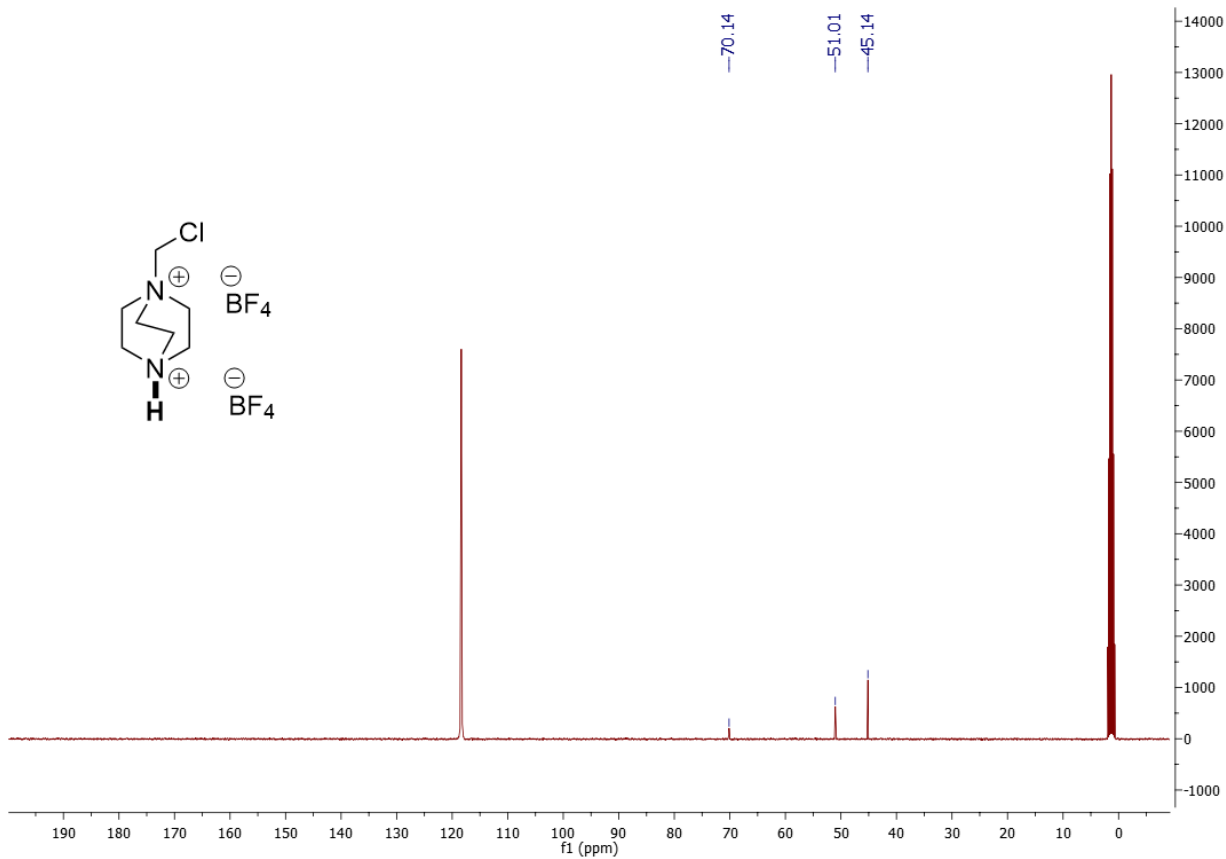



$^{19}\text{F}$  NMR of compound **H-TEDA(BF<sub>4</sub>)<sub>2</sub>** in CD<sub>3</sub>CN

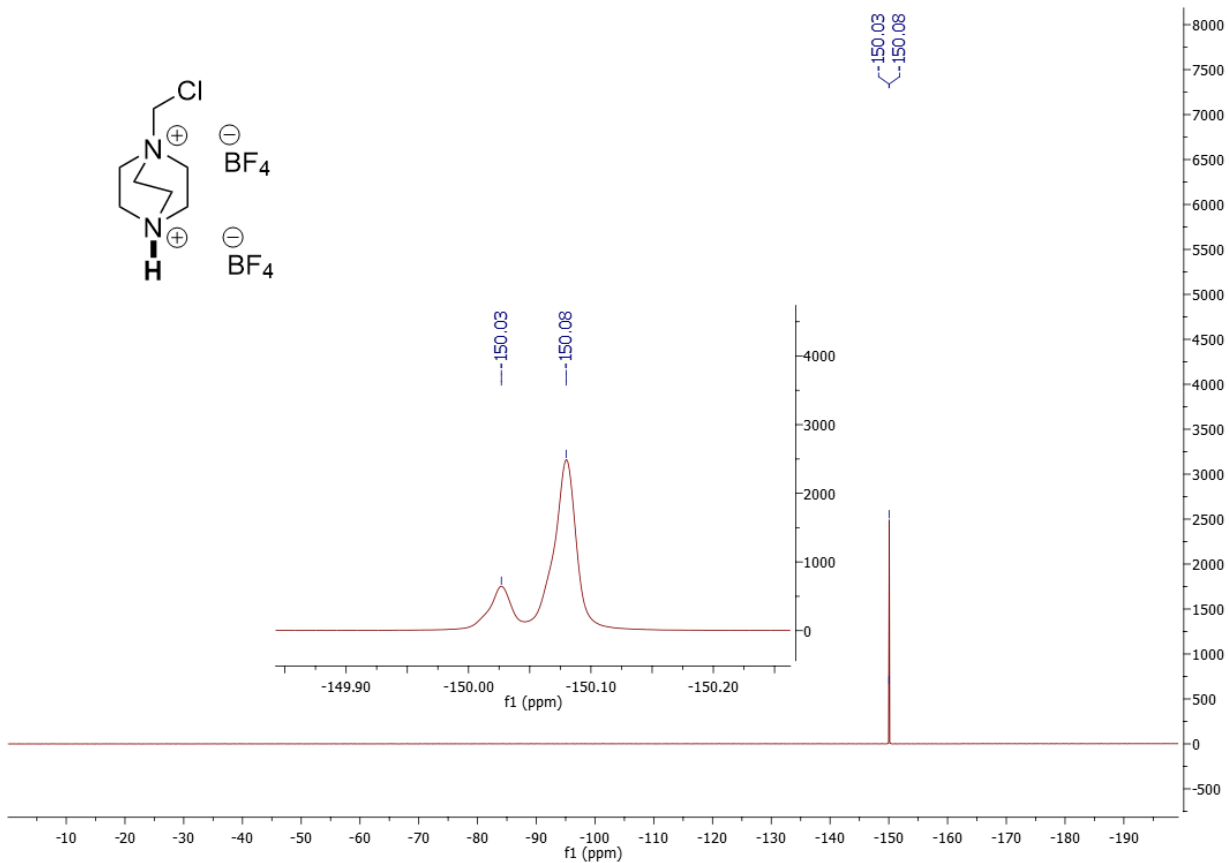

$^1\text{H}$  NMR of compound **TEDA·Cl** in DMSO-d<sub>6</sub>

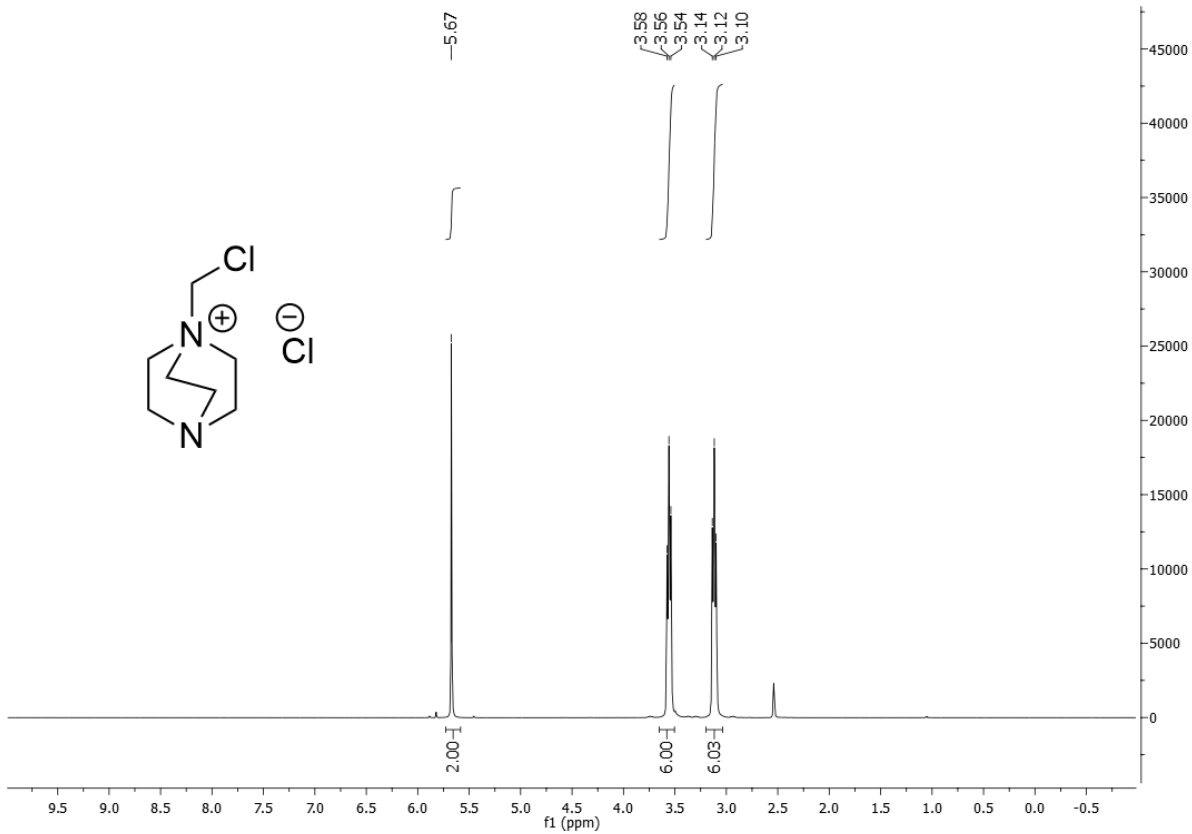

$^{13}\text{C}$  NMR of compound **TEDA·Cl** in  $\text{DMSO-d}_6$

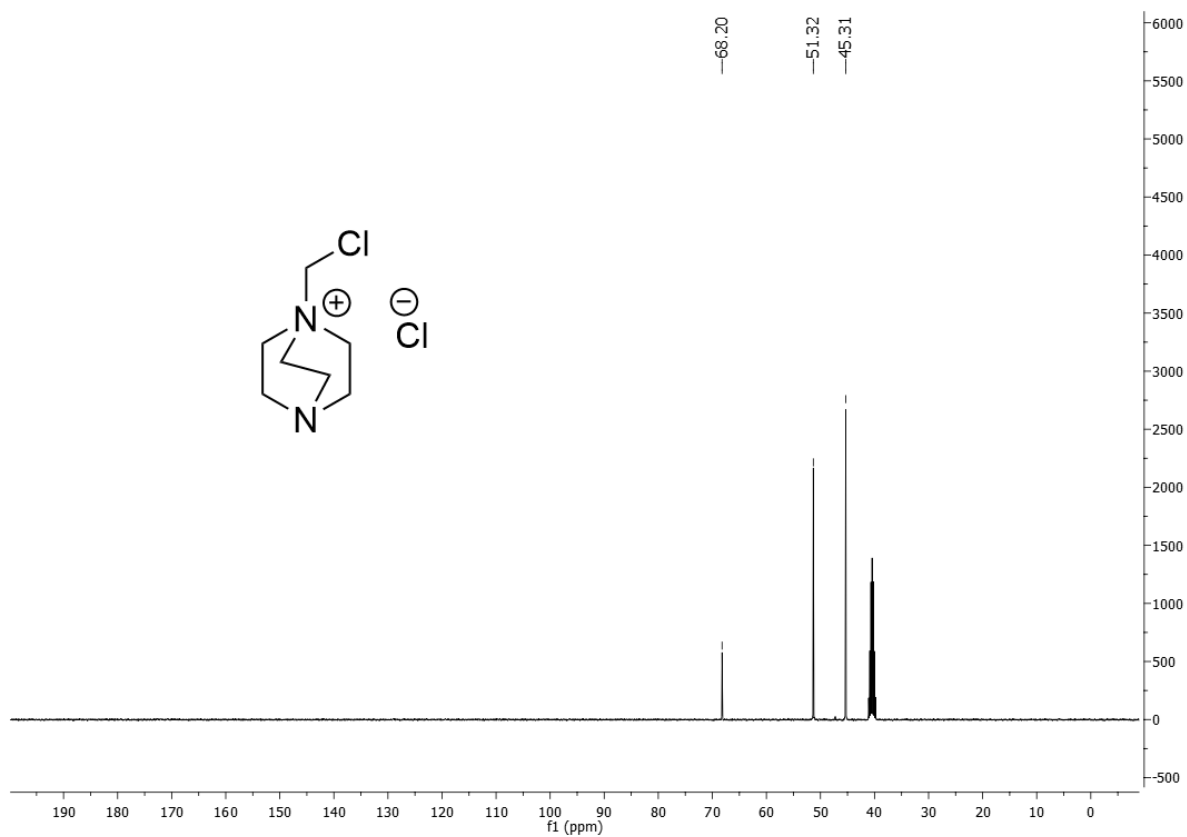

$^1\text{H}$  NMR of compound **H-TEDA(Cl) $_2$**  in  $\text{D}_2\text{O}$

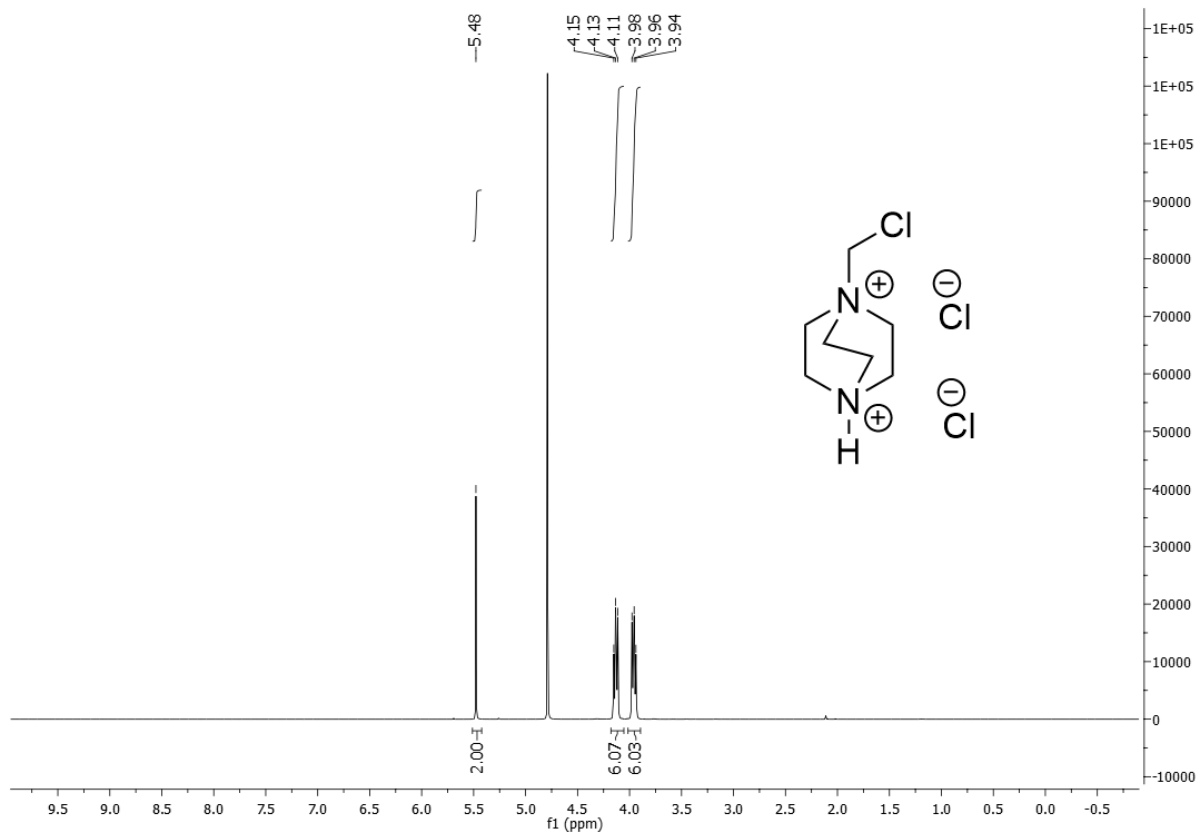

$^{13}\text{C}$  NMR of compound **H-TEDA(Cl)<sub>2</sub>** in  $\text{D}_2\text{O}$

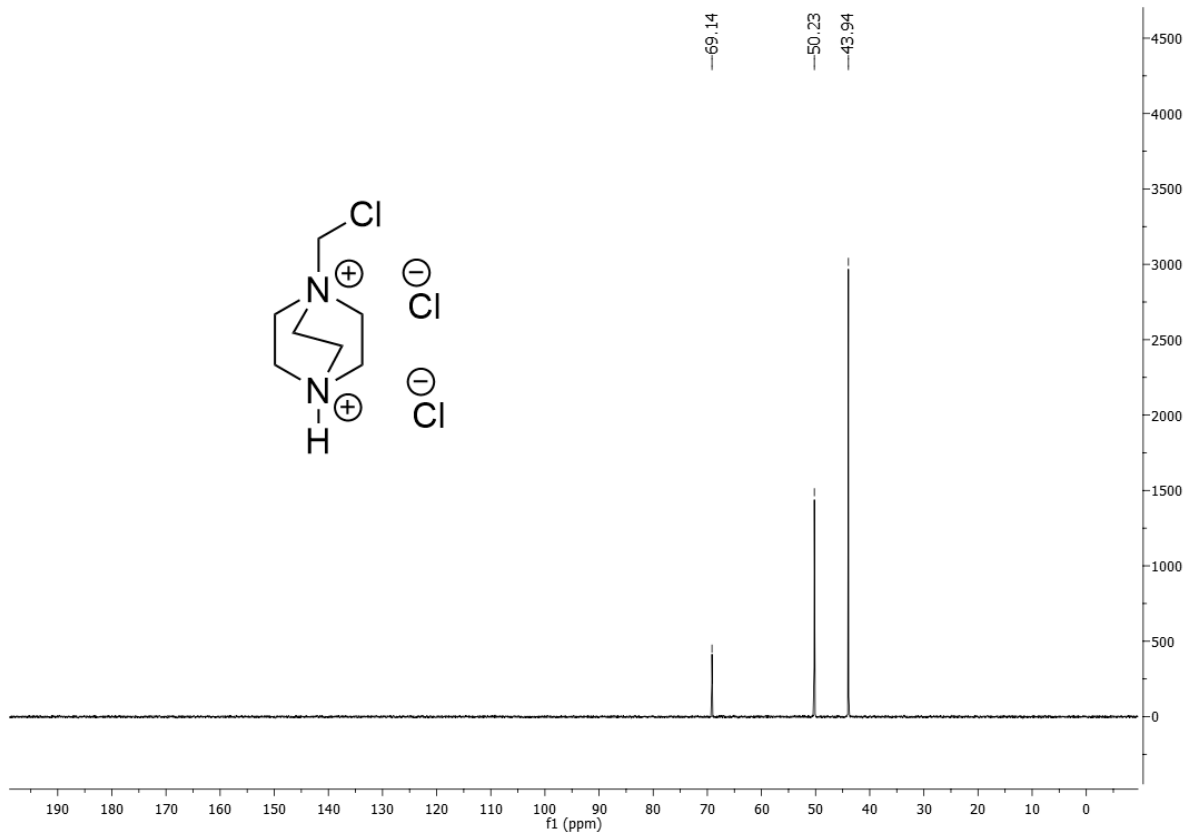

$^1\text{H}$  NMR of compound **TEDA·BF<sub>4</sub>** in  $\text{DMSO-d}_6$

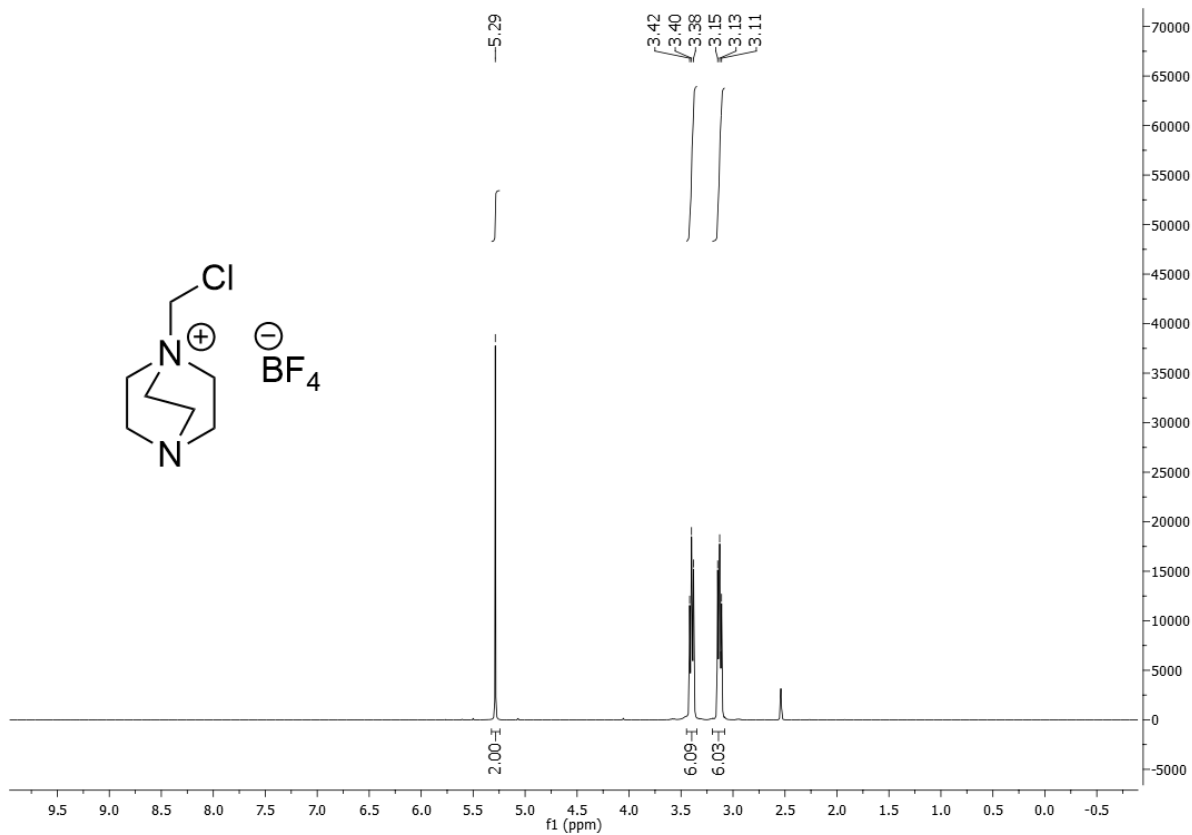

$^{13}\text{C}$  NMR of compound **TEDA**·**BF<sub>4</sub>** in DMSO-d<sub>6</sub>

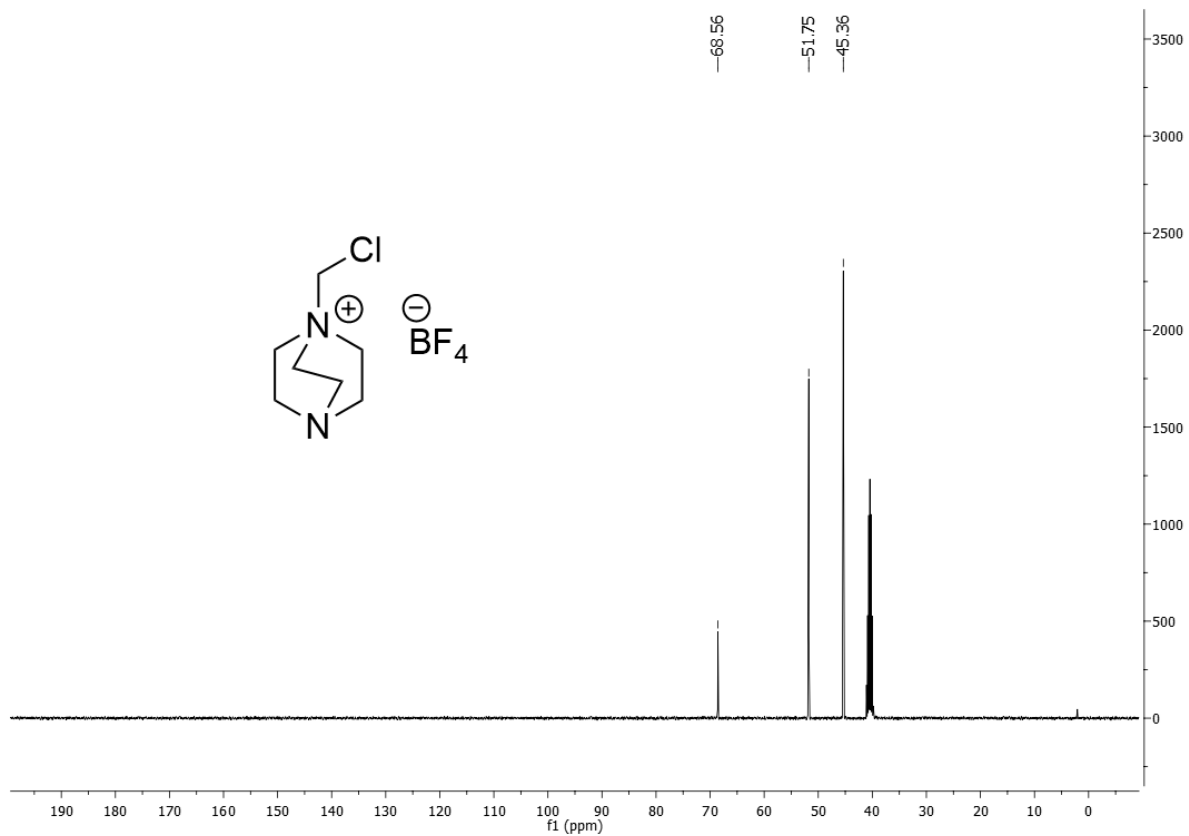

$^{19}\text{F}$  NMR of compound **TEDA**·**BF<sub>4</sub>** in DMSO-d<sub>6</sub>

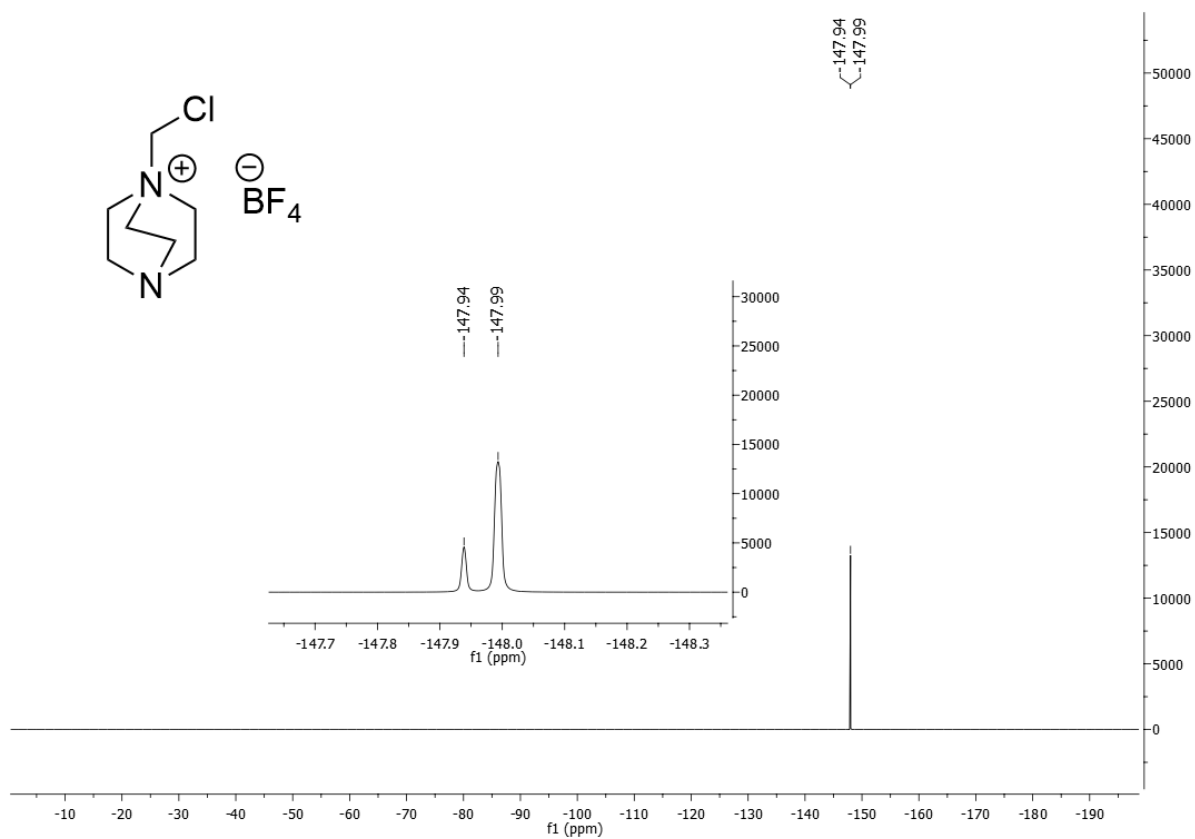

$^1\text{H}$  NMR of compound **H-TEDA(PF<sub>6</sub>)<sub>2</sub>** in CD<sub>3</sub>CN

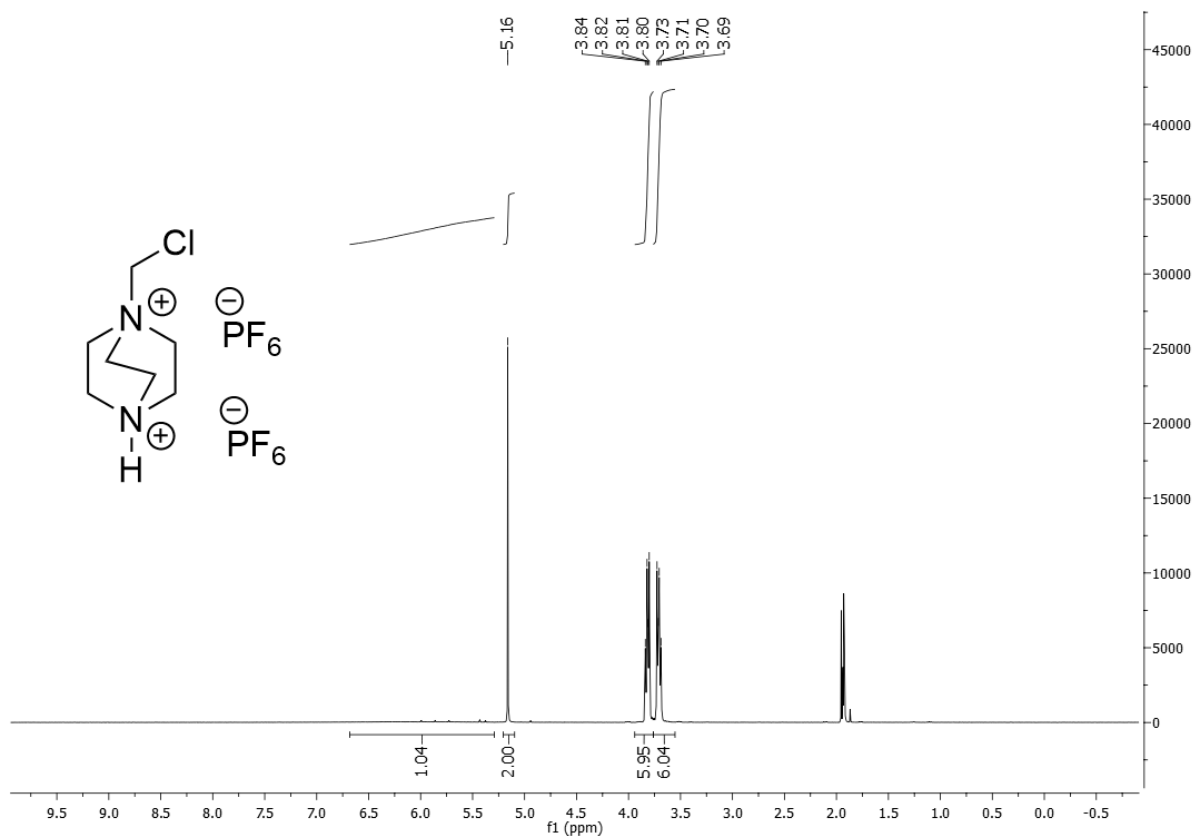

$^{13}\text{C}$  NMR of compound **H-TEDA(PF<sub>6</sub>)<sub>2</sub>** in CD<sub>3</sub>CN

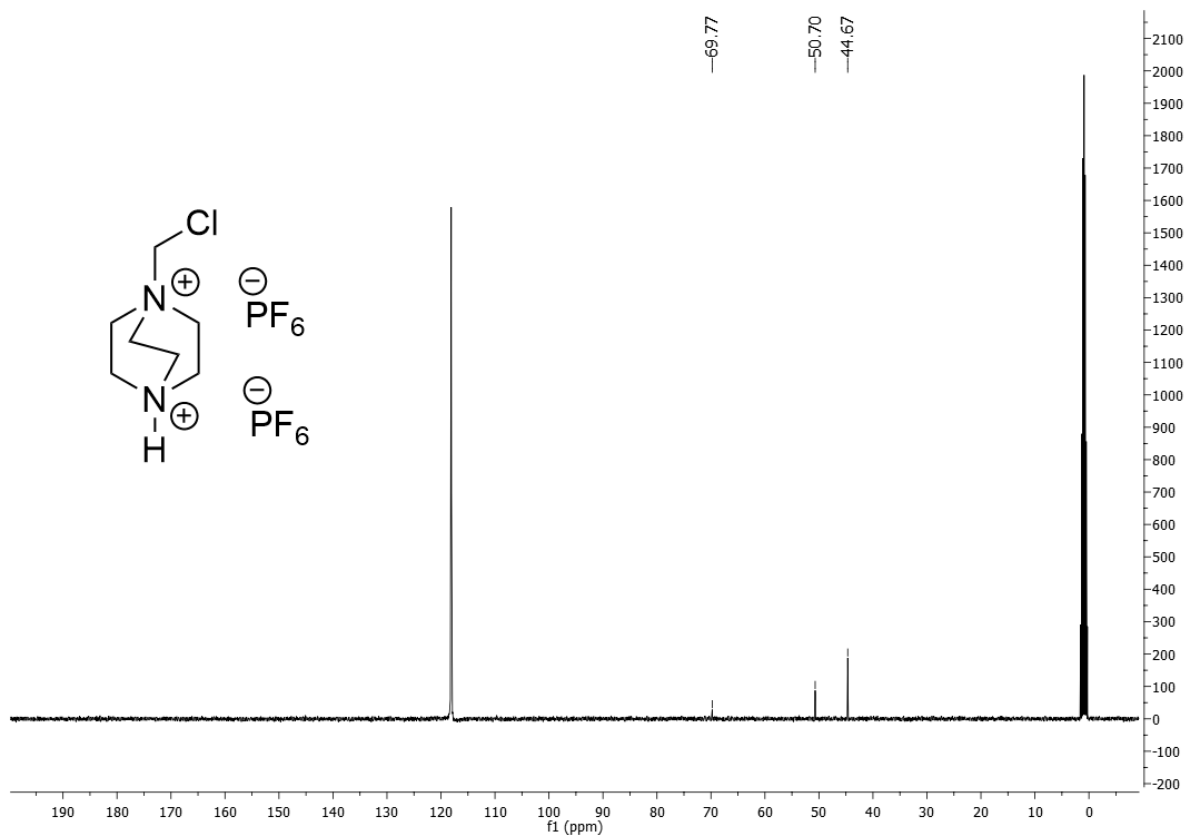

$^{19}\text{F}$  NMR of compound **H-TEDA(PF<sub>6</sub>)<sub>2</sub>** in CD<sub>3</sub>CN

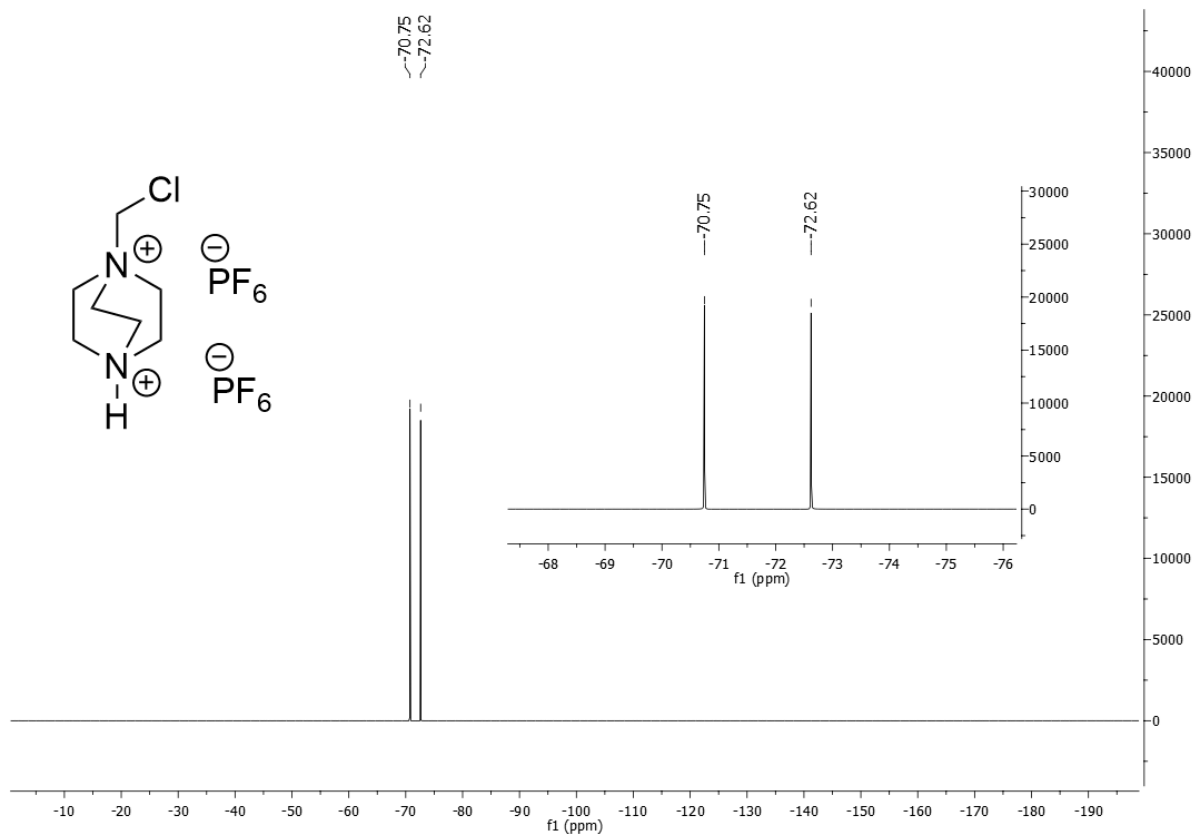

$^{31}\text{P}$  NMR of compound **H-TEDA(PF<sub>6</sub>)<sub>2</sub>** in CD<sub>3</sub>CN

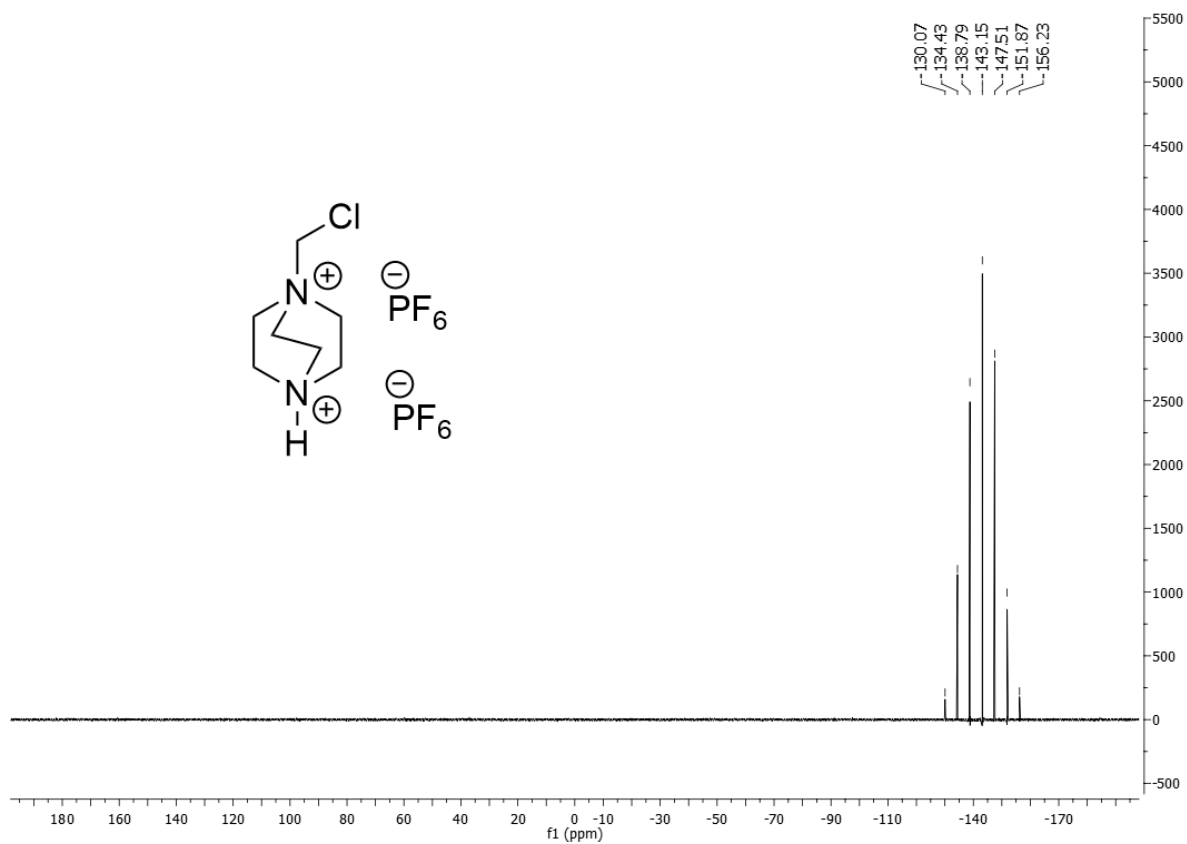

$^1\text{H}$  NMR of compound **5** in  $\text{CD}_3\text{CN}$

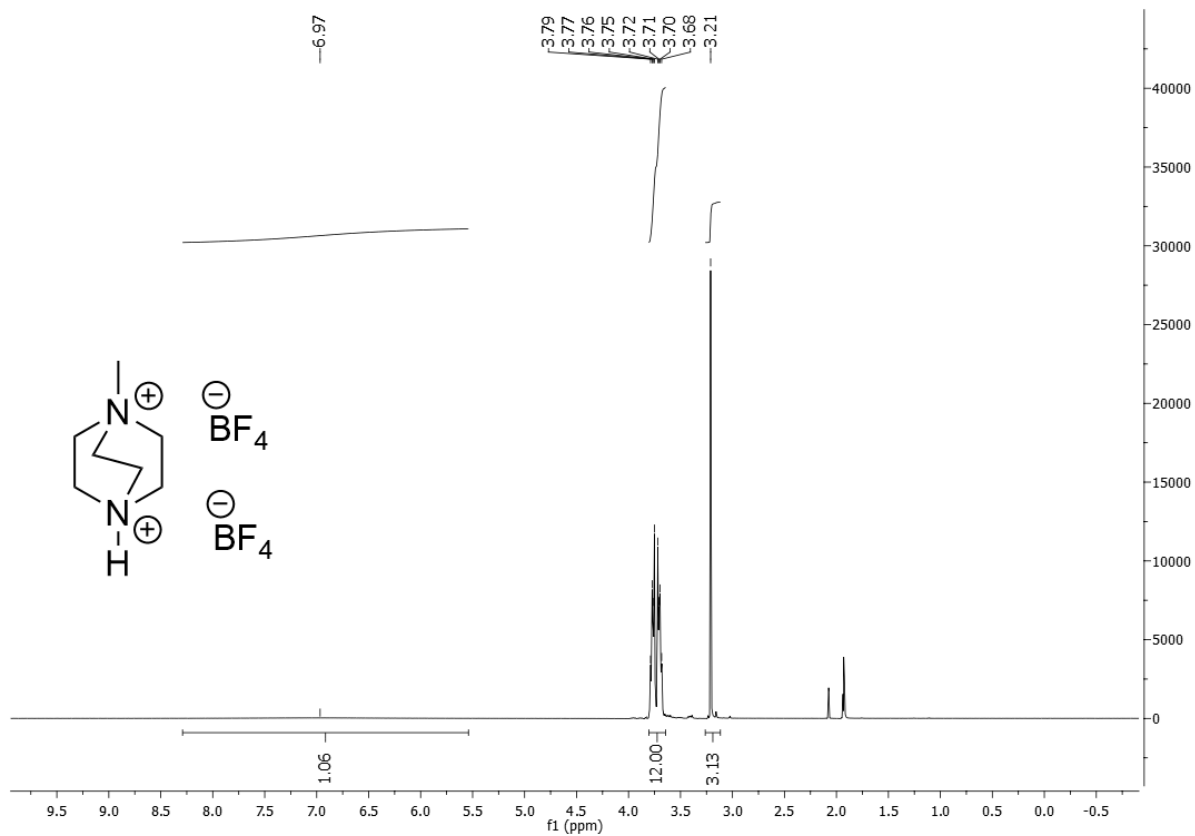

$^{13}\text{C}$  NMR of compound **5** in  $\text{CD}_3\text{CN}$

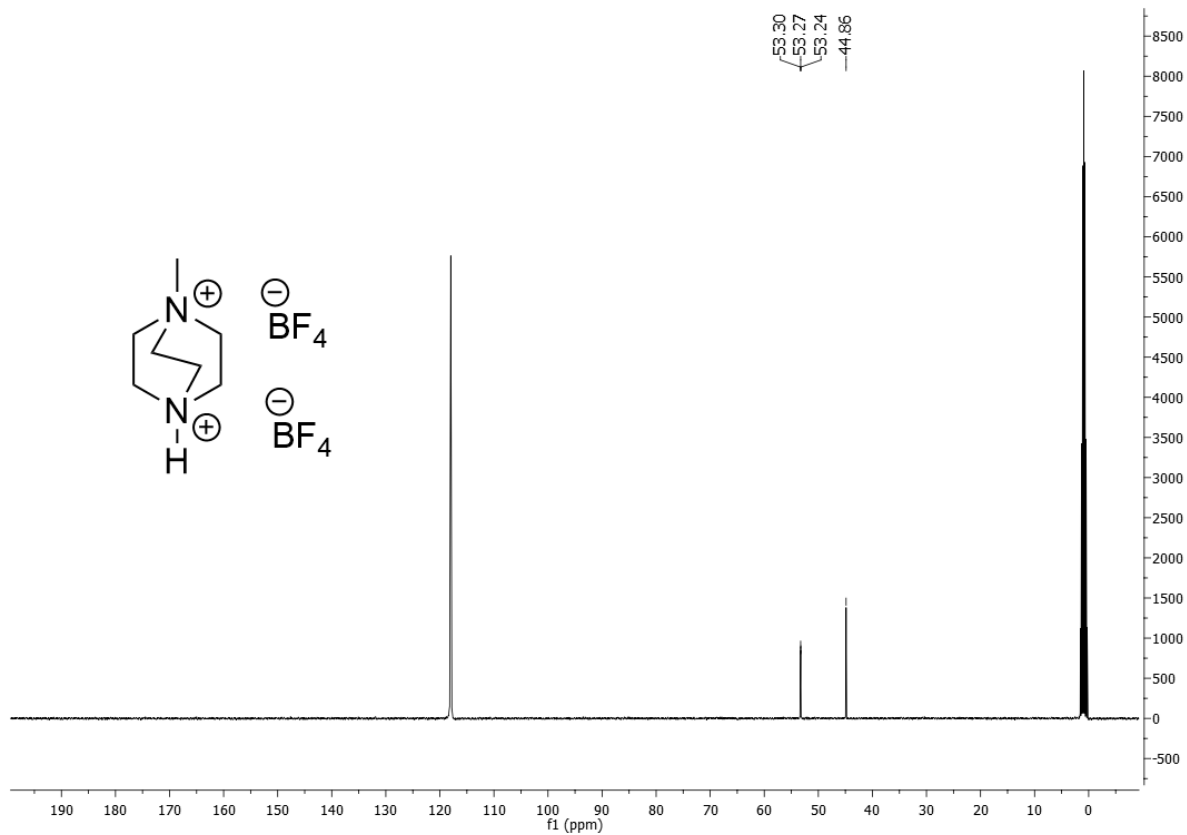

$^{19}\text{F}$  NMR of compound **5** in  $\text{CD}_3\text{CN}$

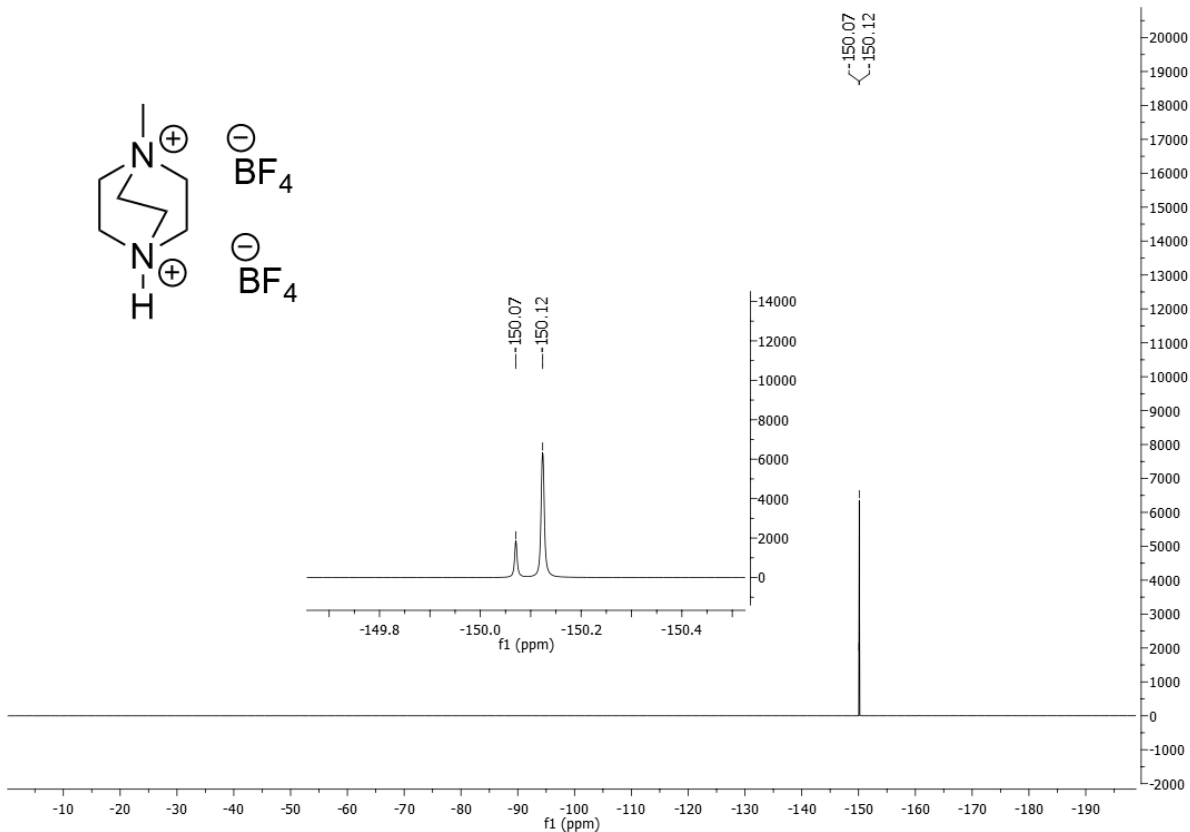

$^1\text{H}$  NMR of compound **6** in  $\text{CD}_3\text{CN}$

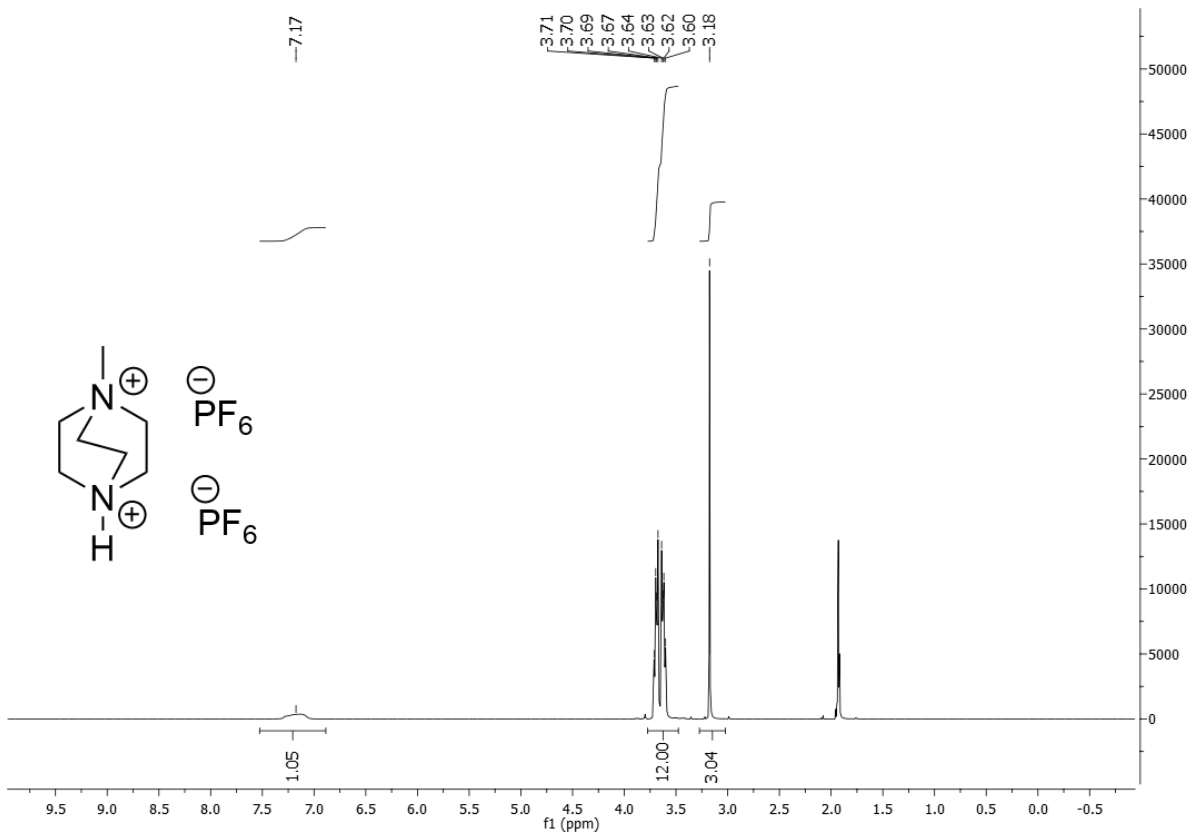



$^{13}\text{C}$  NMR of compound **6** in  $\text{CD}_3\text{CN}$

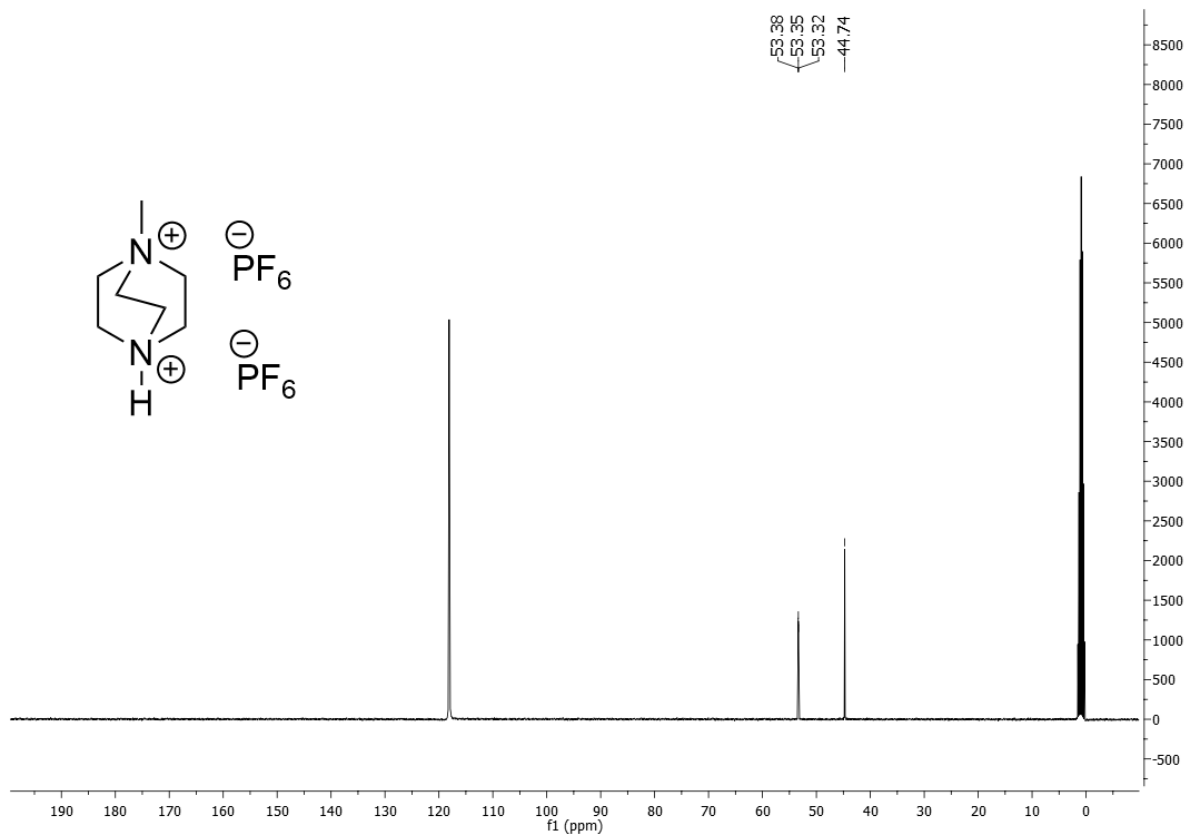

$^{19}\text{F}$  NMR of compound **6** in  $\text{CD}_3\text{CN}$

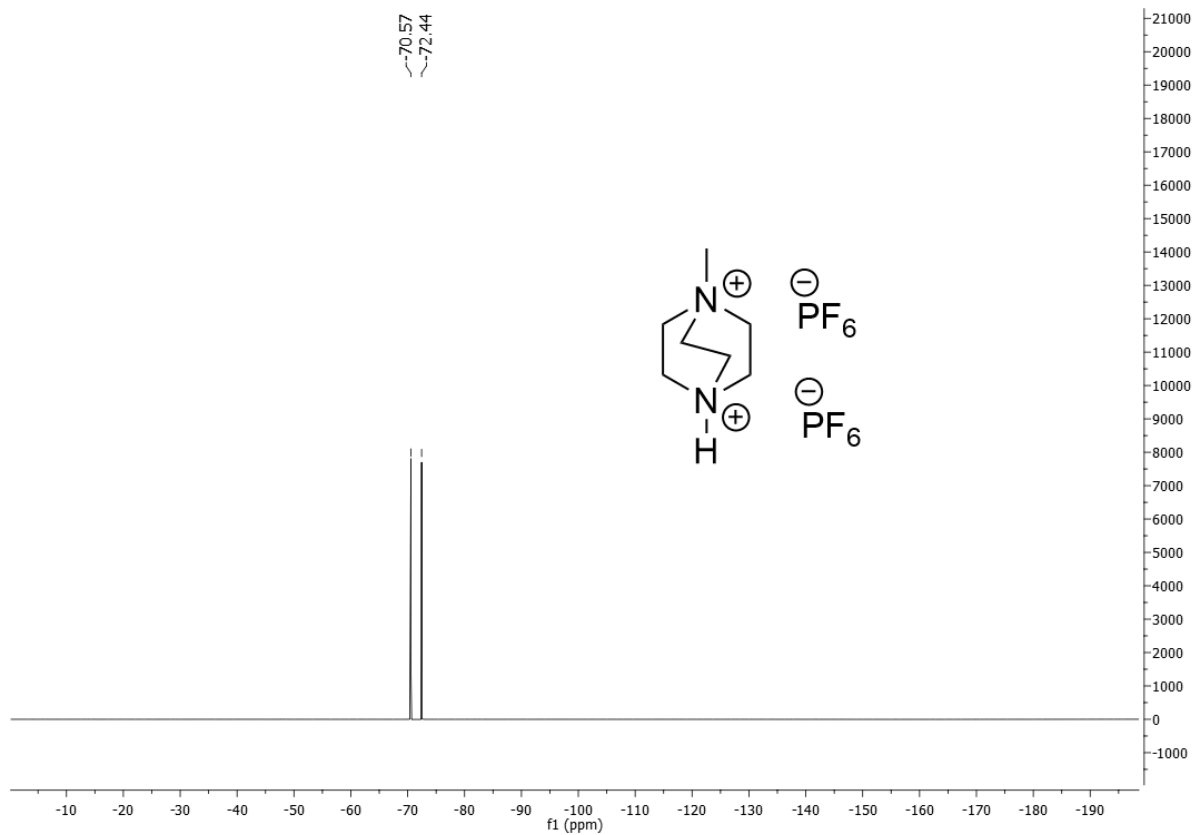

$^{31}\text{P}$  NMR of compound **6** in  $\text{CD}_3\text{CN}$

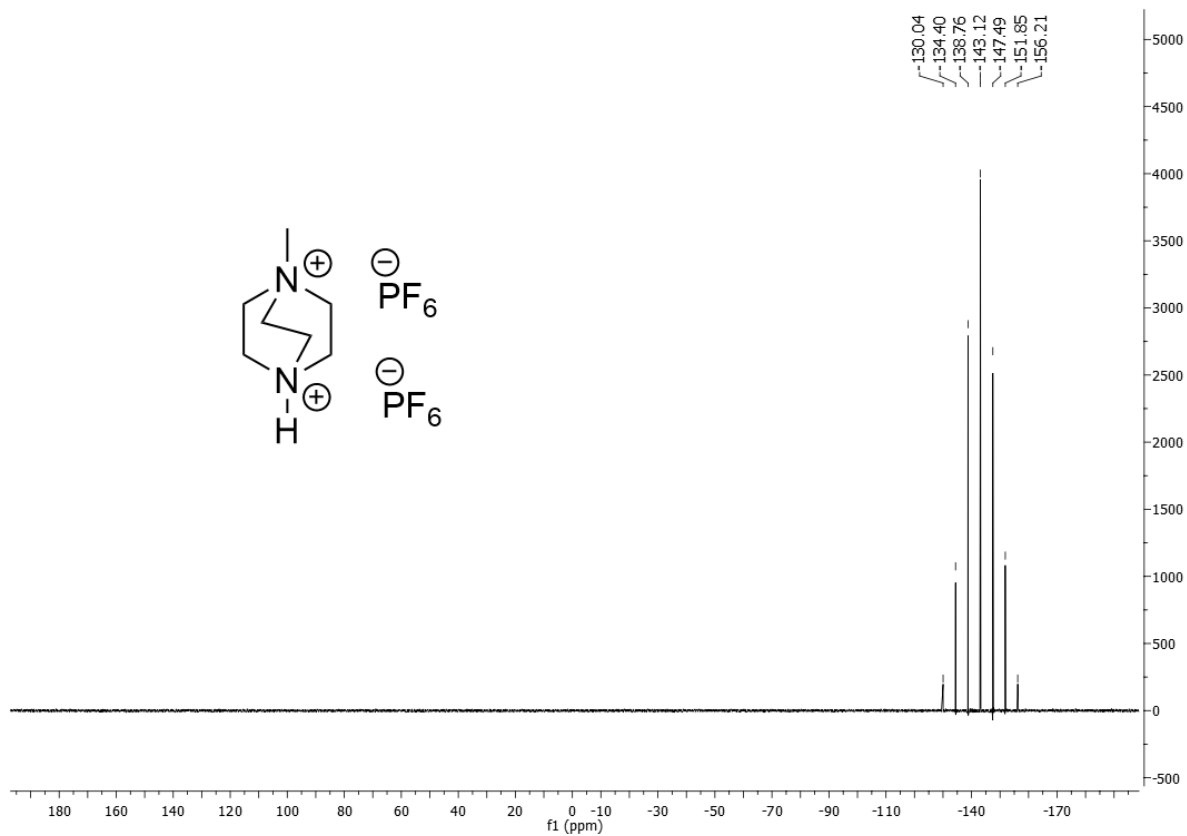

$^1\text{H}$  NMR of compound **7** in  $\text{D}_2\text{O}$

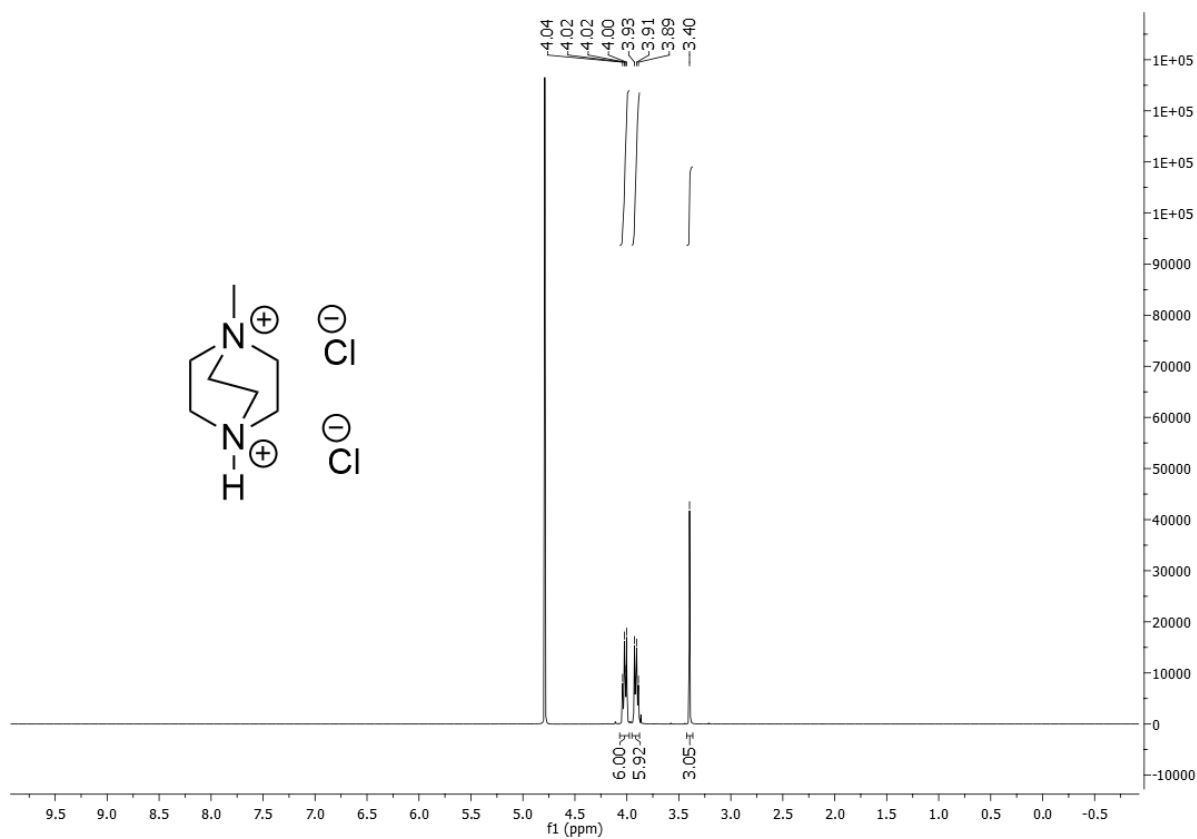

<sup>13</sup>C NMR of compound **7** in D<sub>2</sub>O

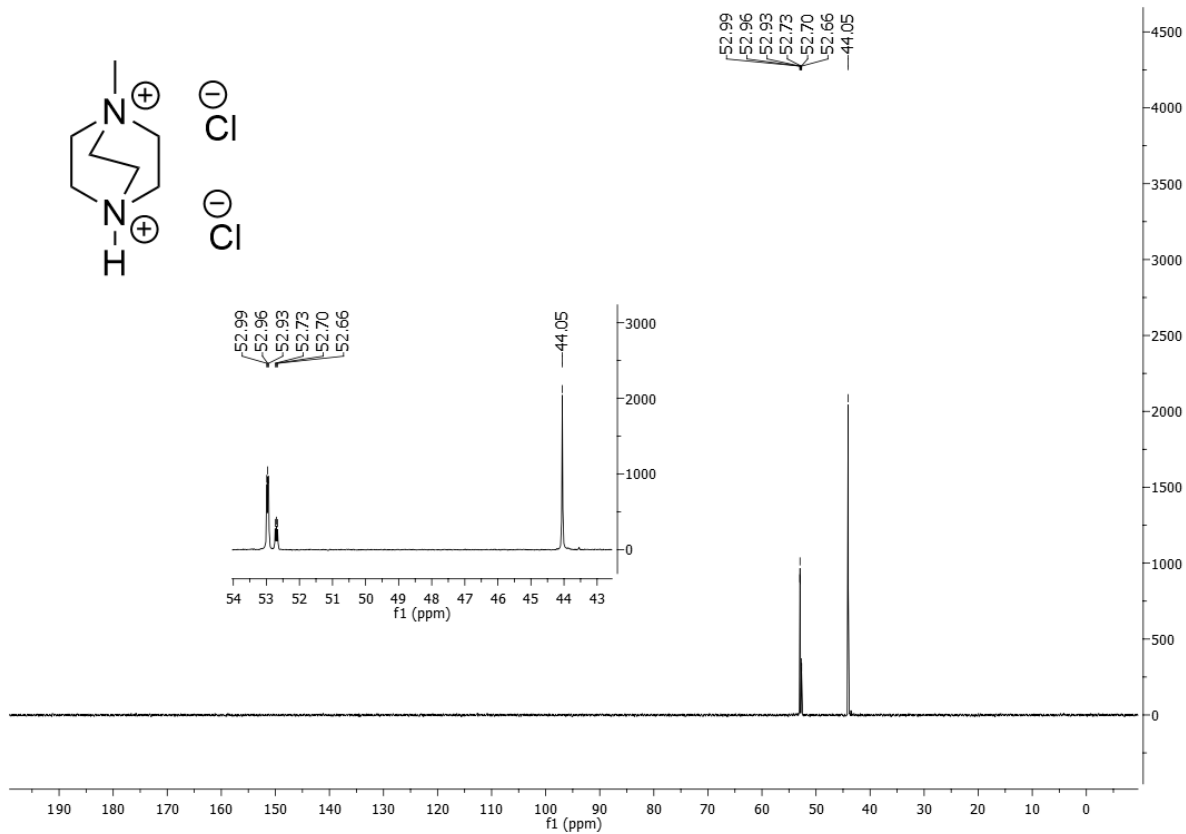

<sup>1</sup>H NMR of compound **2d** in CDCl<sub>3</sub>

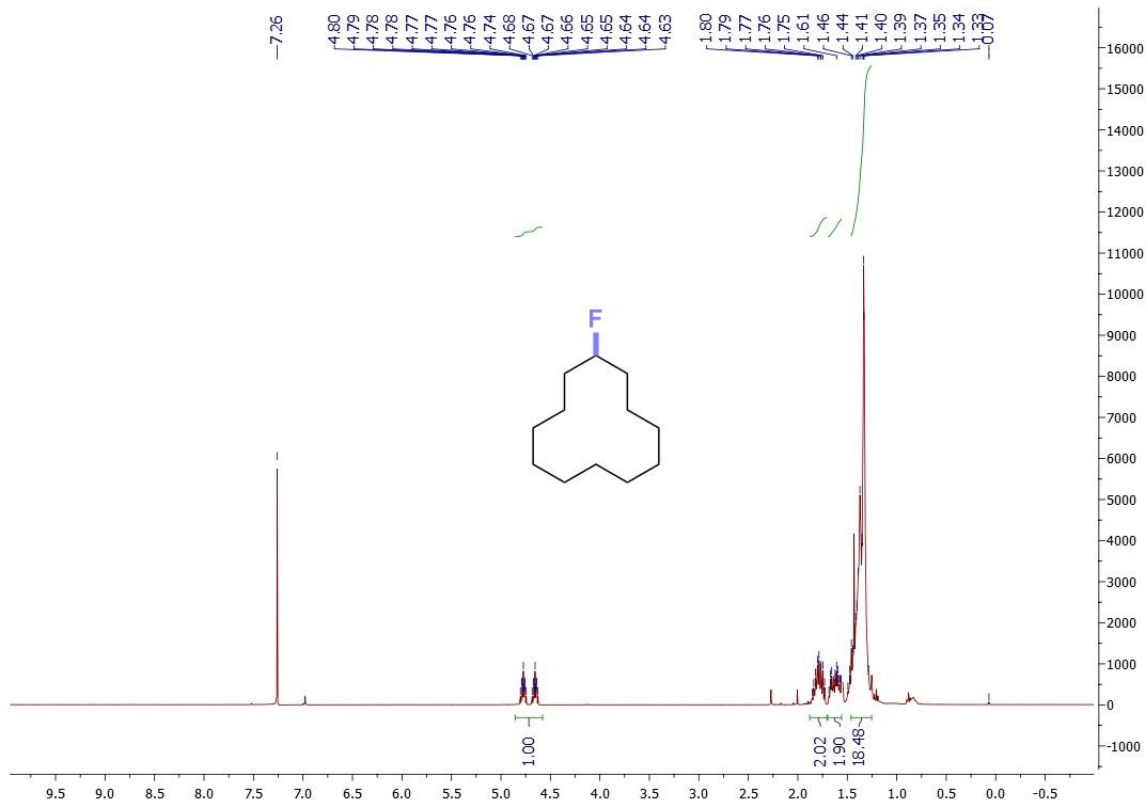

$^{13}\text{C}$  NMR of compound **2d** in  $\text{CDCl}_3$

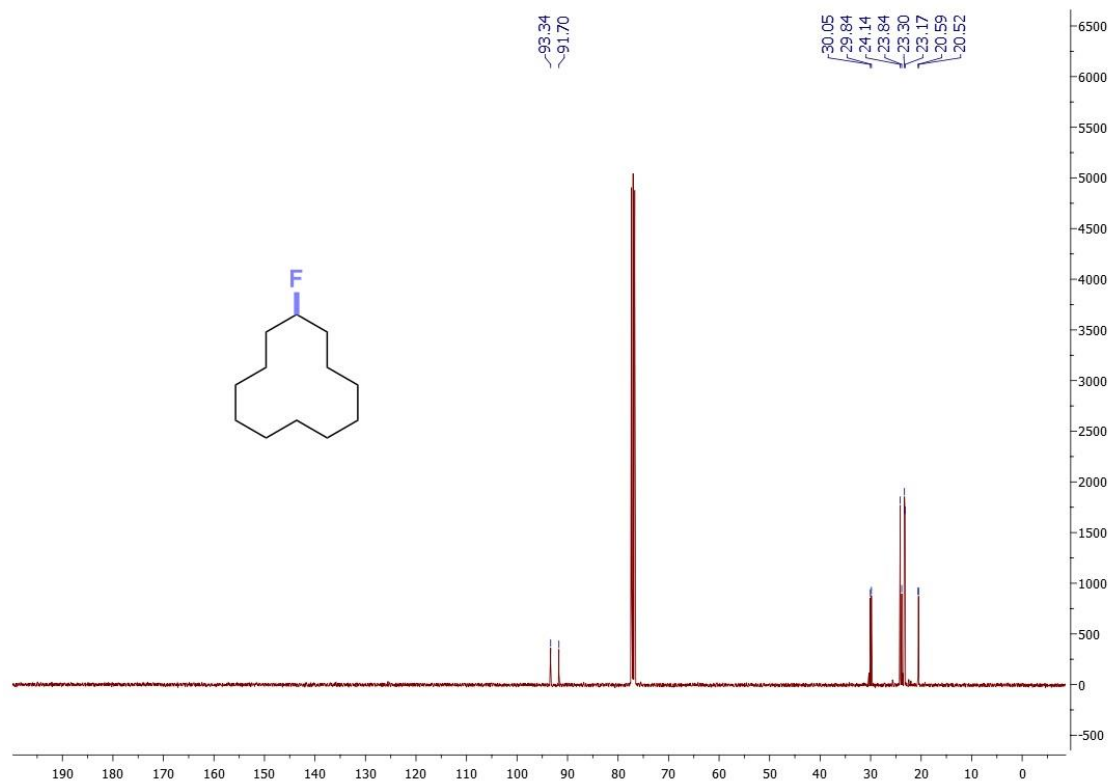

$^{19}\text{F}$  NMR of compound **2d** in  $\text{CDCl}_3$

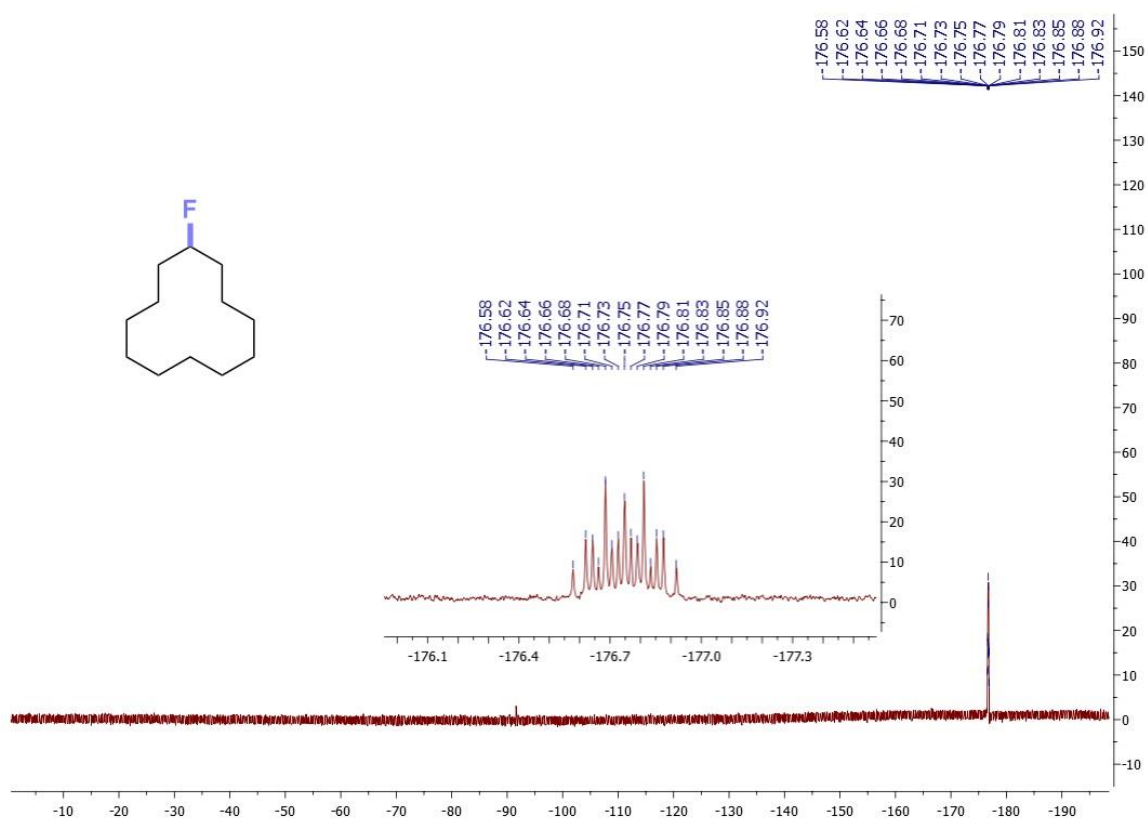

<sup>1</sup>H NMR of compound **2h** in CDCl<sub>3</sub>

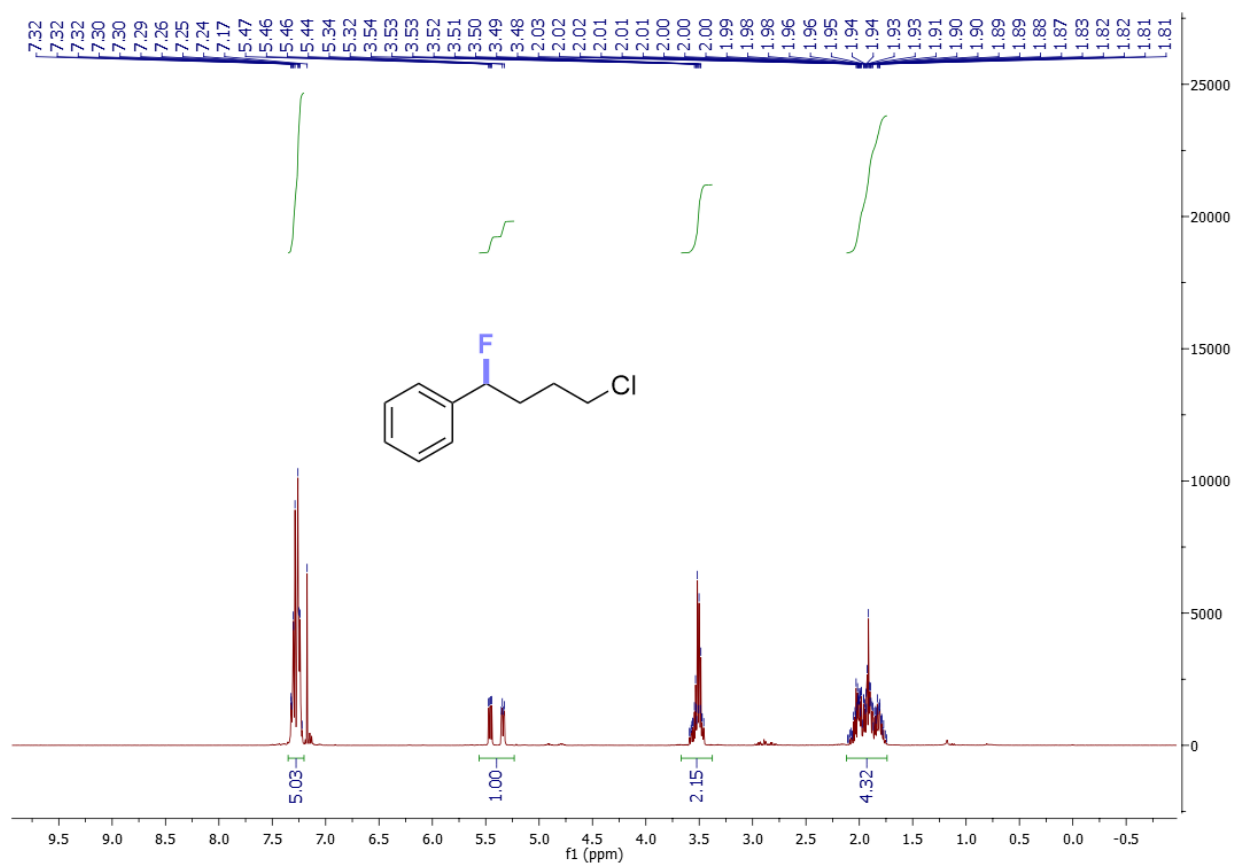

<sup>13</sup>C NMR of compound **2h** in CDCl<sub>3</sub>

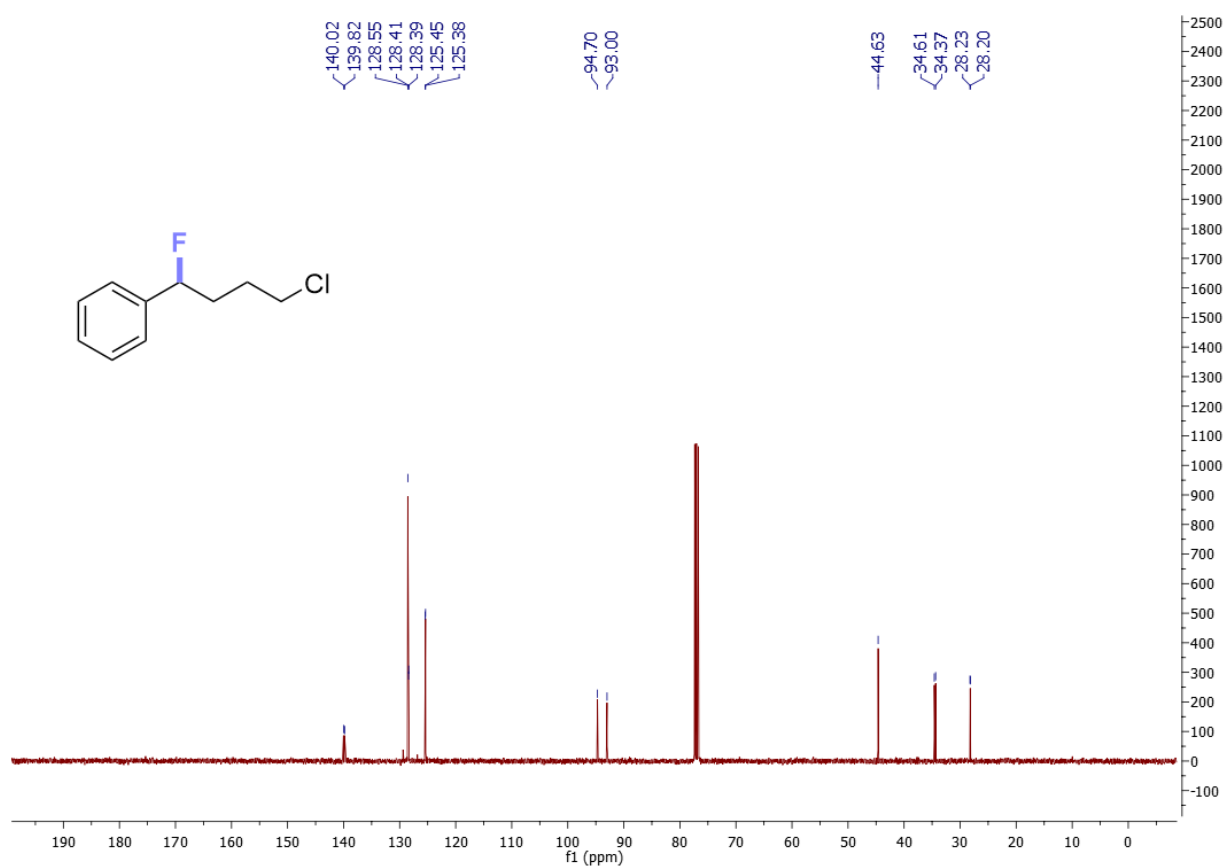

$^{19}\text{F}$  NMR of compound **2h** in  $\text{CDCl}_3$

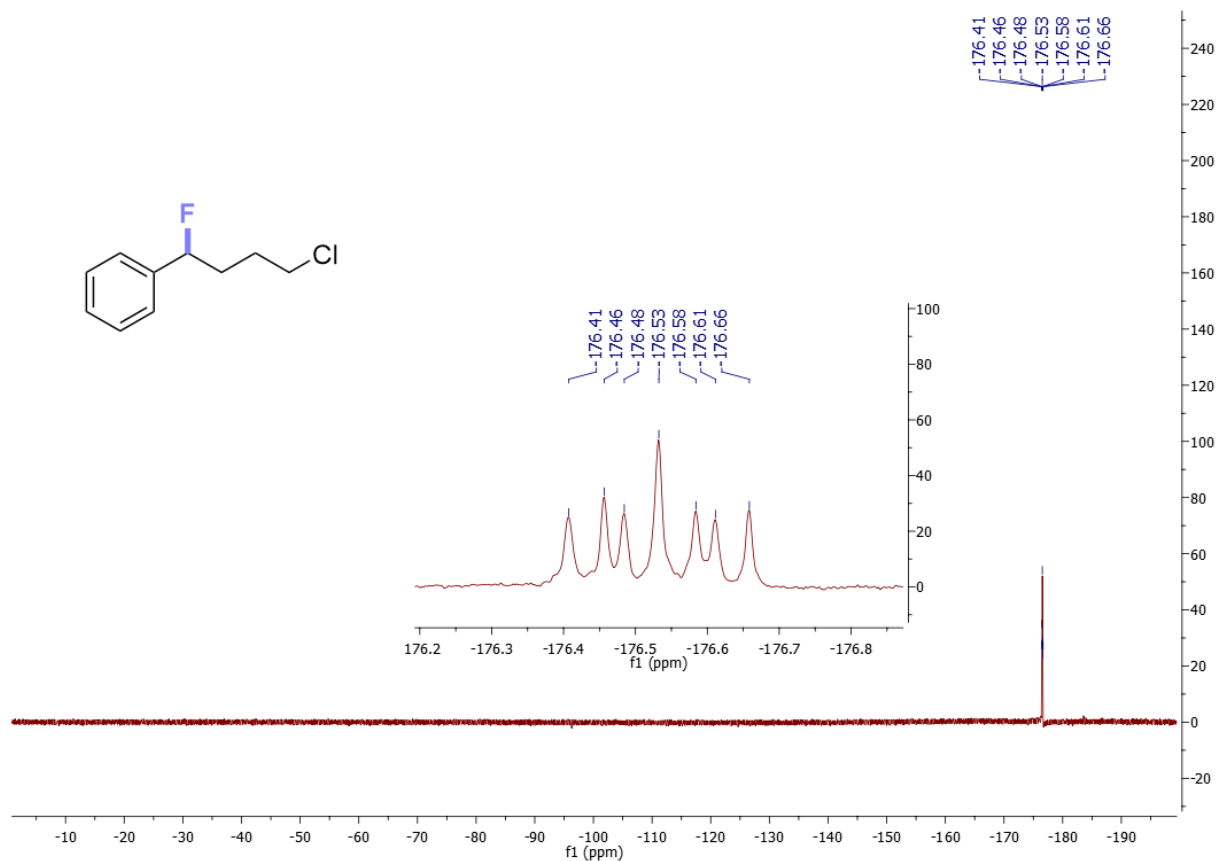

$^1\text{H}$  NMR of compound **2q** in  $\text{CDCl}_3$

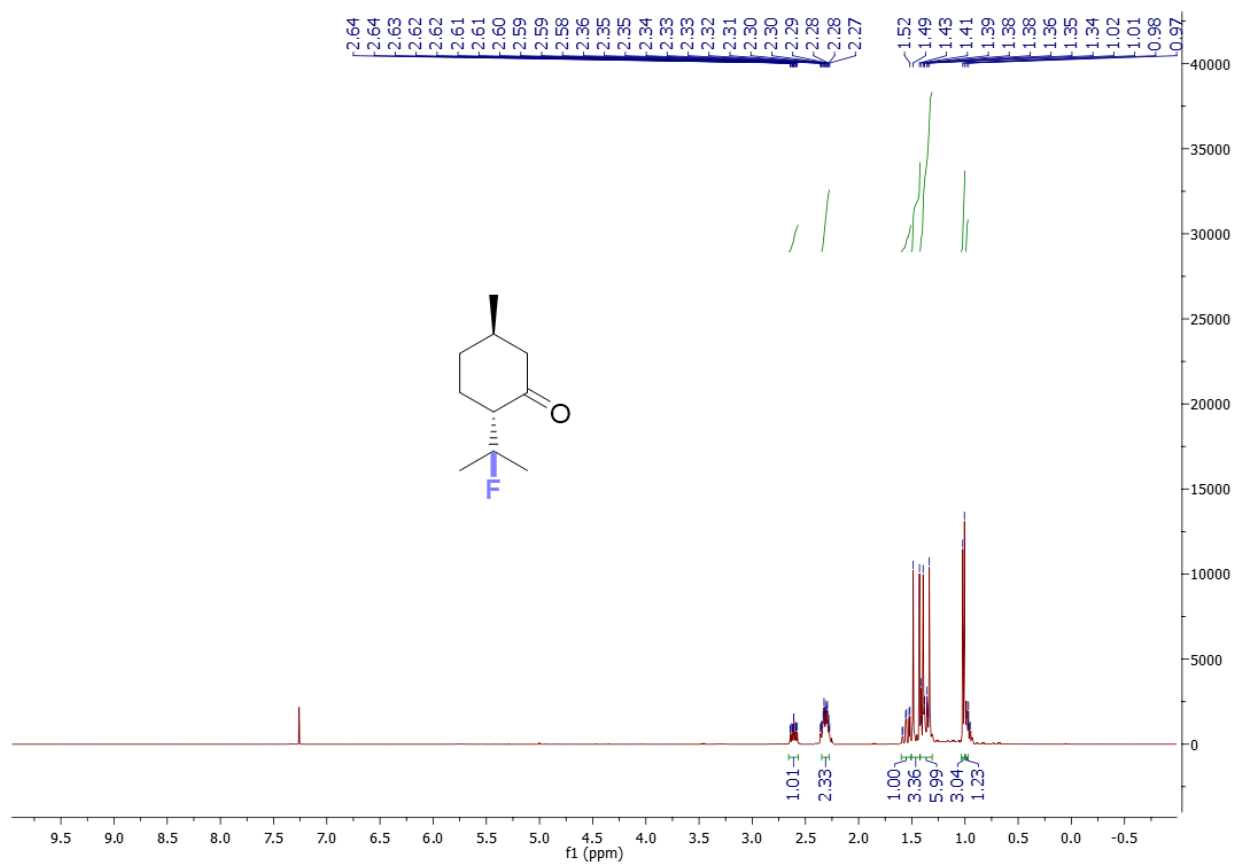

$^{13}\text{C}$  NMR of compound **2q** in  $\text{CDCl}_3$

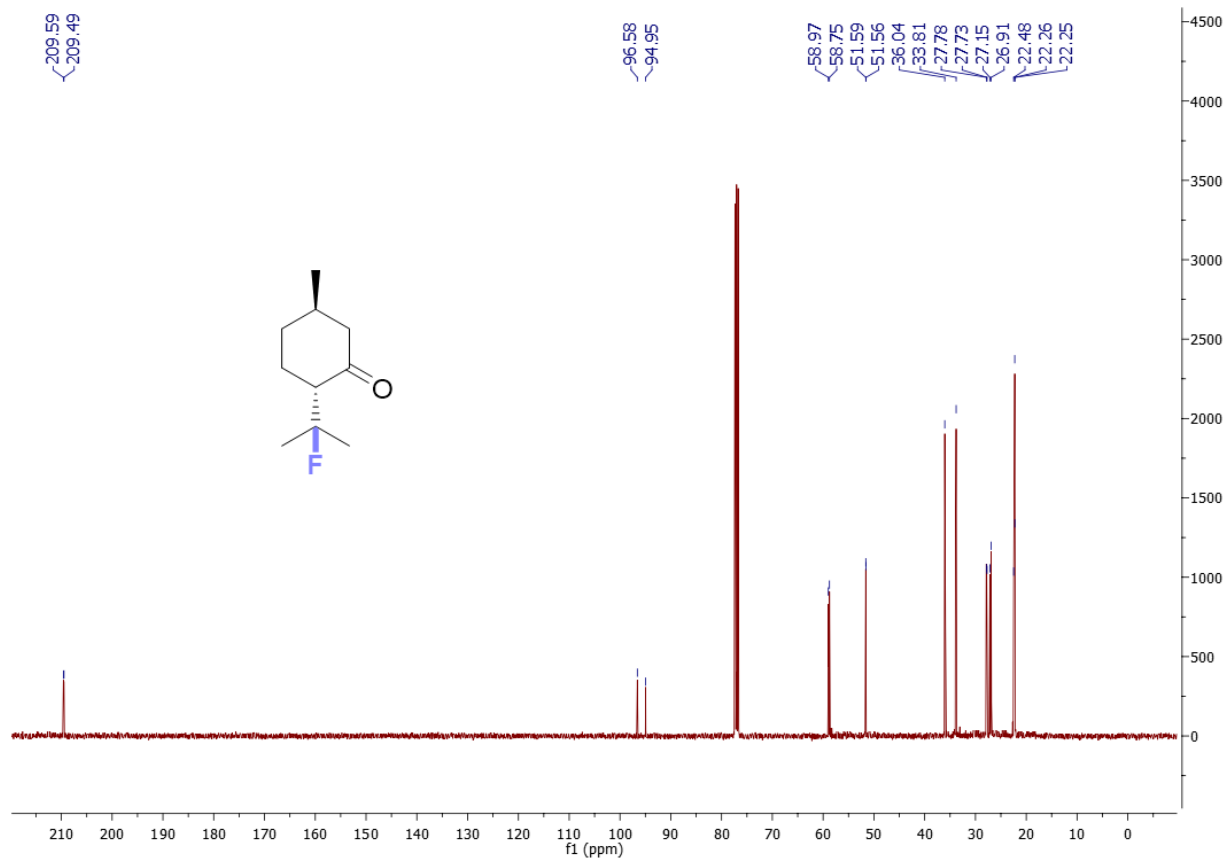

$^{19}\text{F}$  NMR of compound **2q** in  $\text{CDCl}_3$

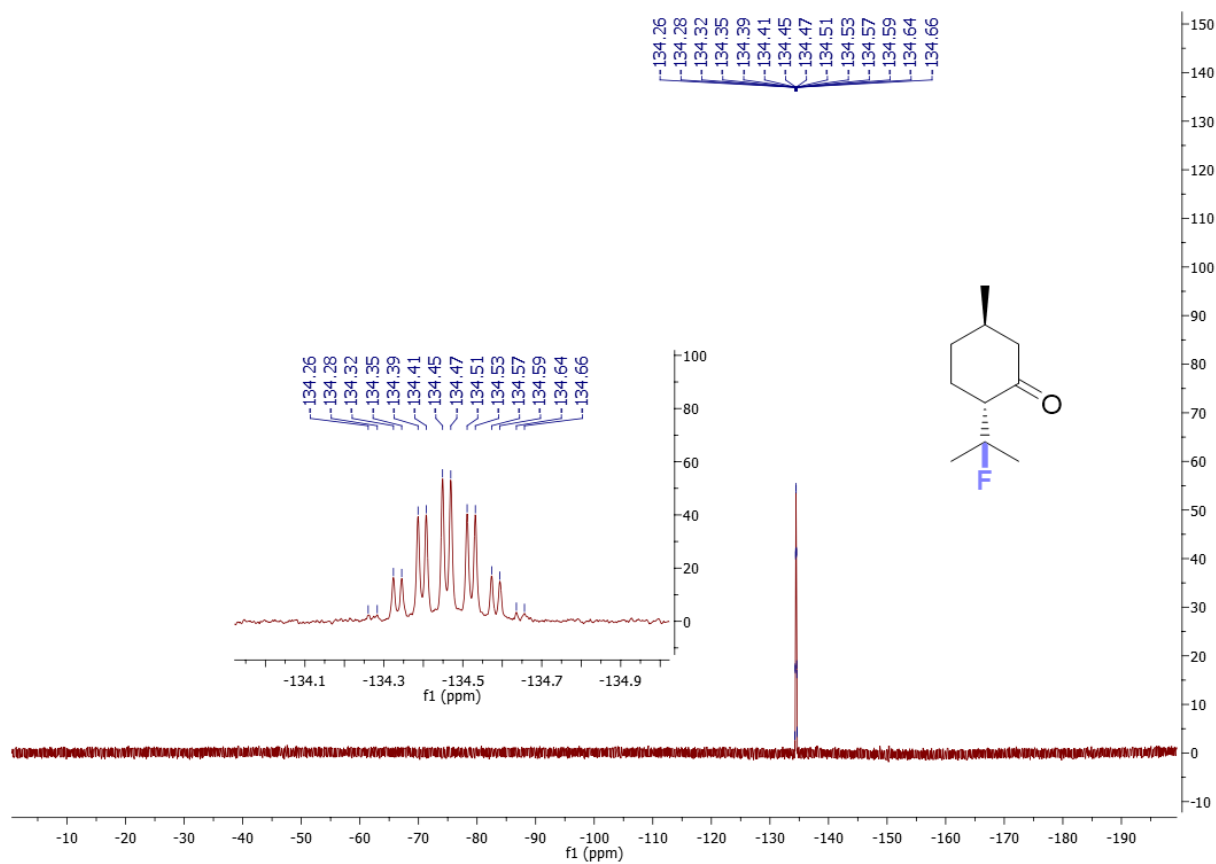

$^1\text{H}$  NMR of compound **2r** in  $\text{CD}_3\text{CN}$

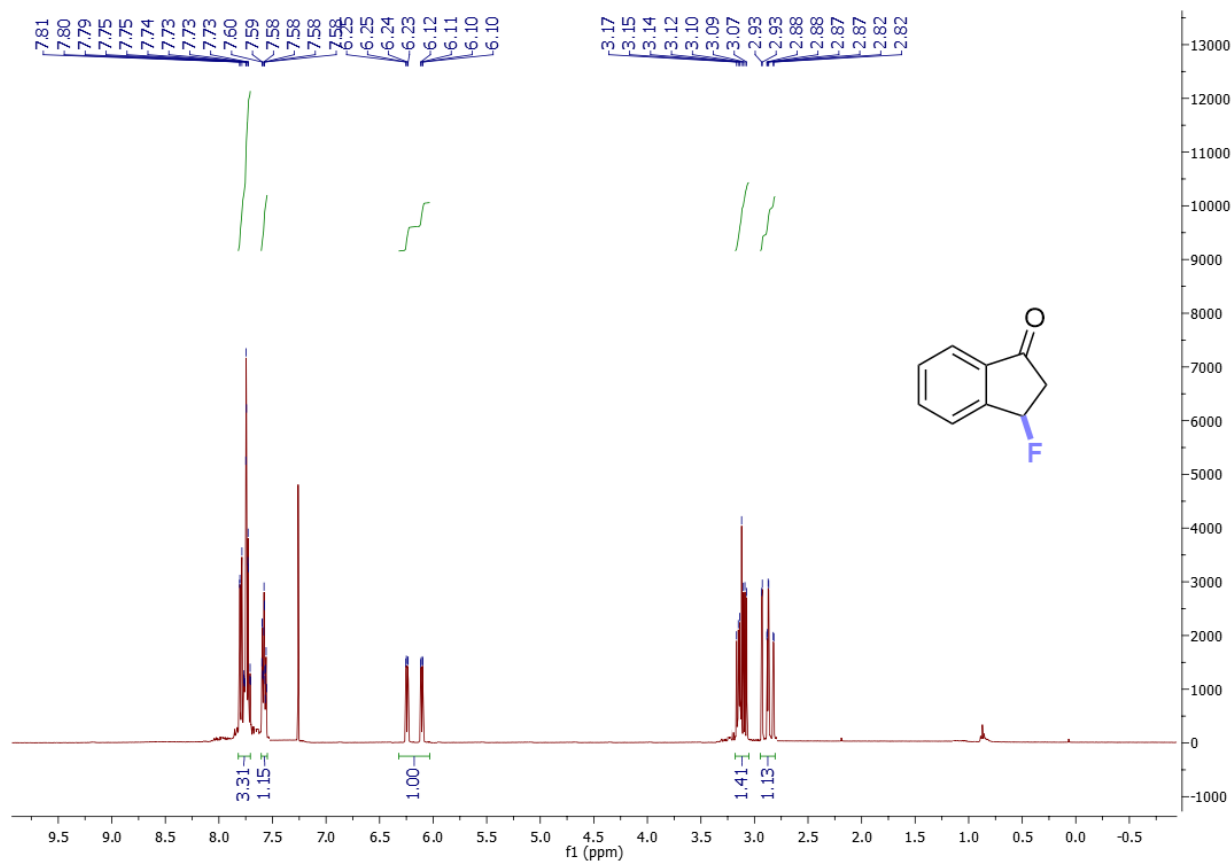

$^{13}\text{C}$  NMR of compound **2r** in  $\text{CD}_3\text{CN}$

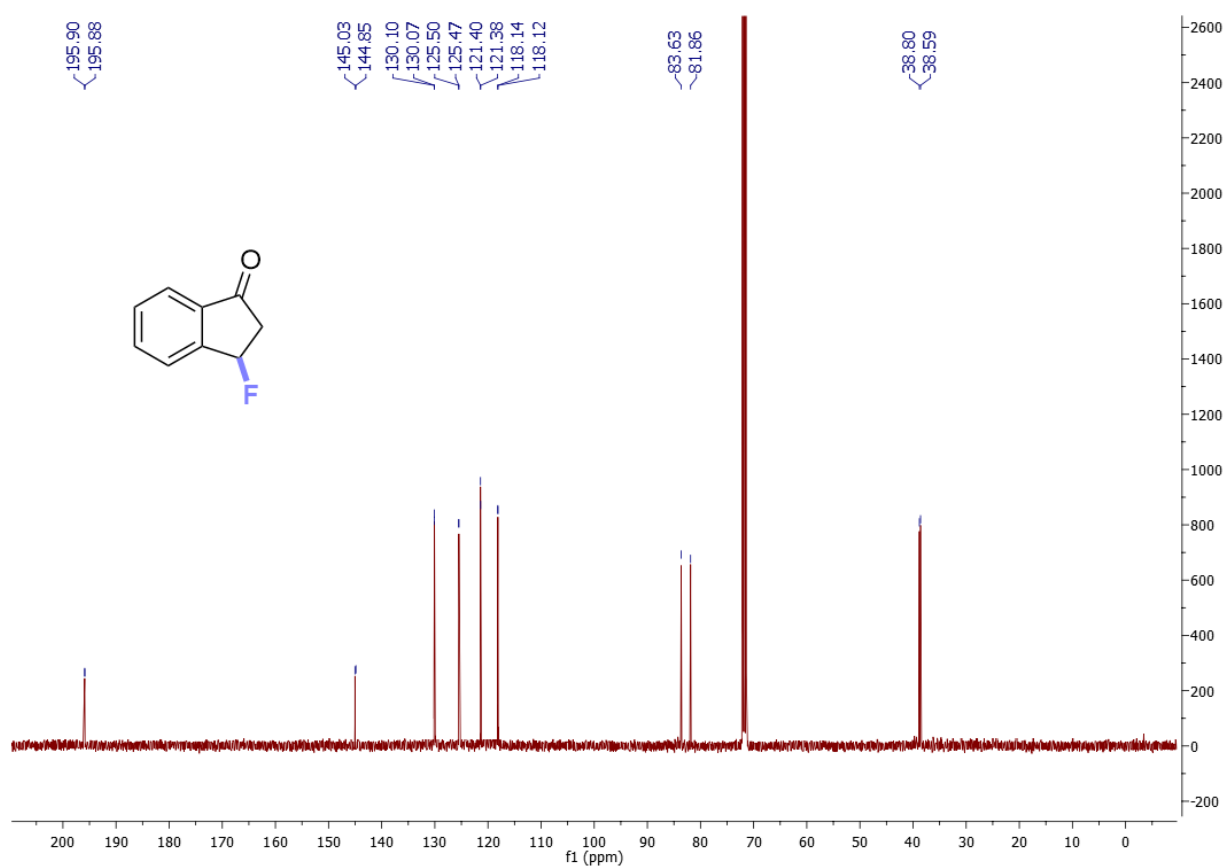



<sup>19</sup>F NMR of compound **2r** in CD<sub>3</sub>CN

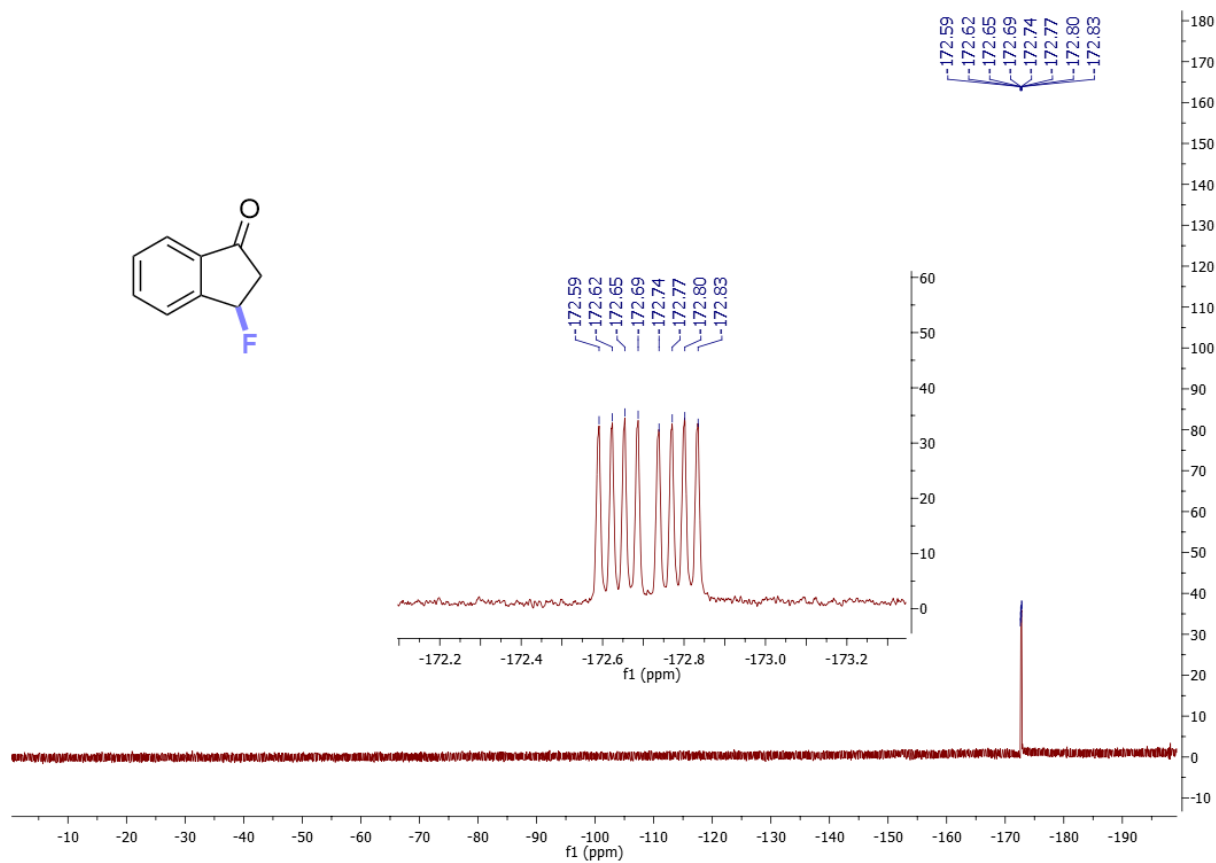

<sup>1</sup>H NMR of compound **2t** in CDCl<sub>3</sub>

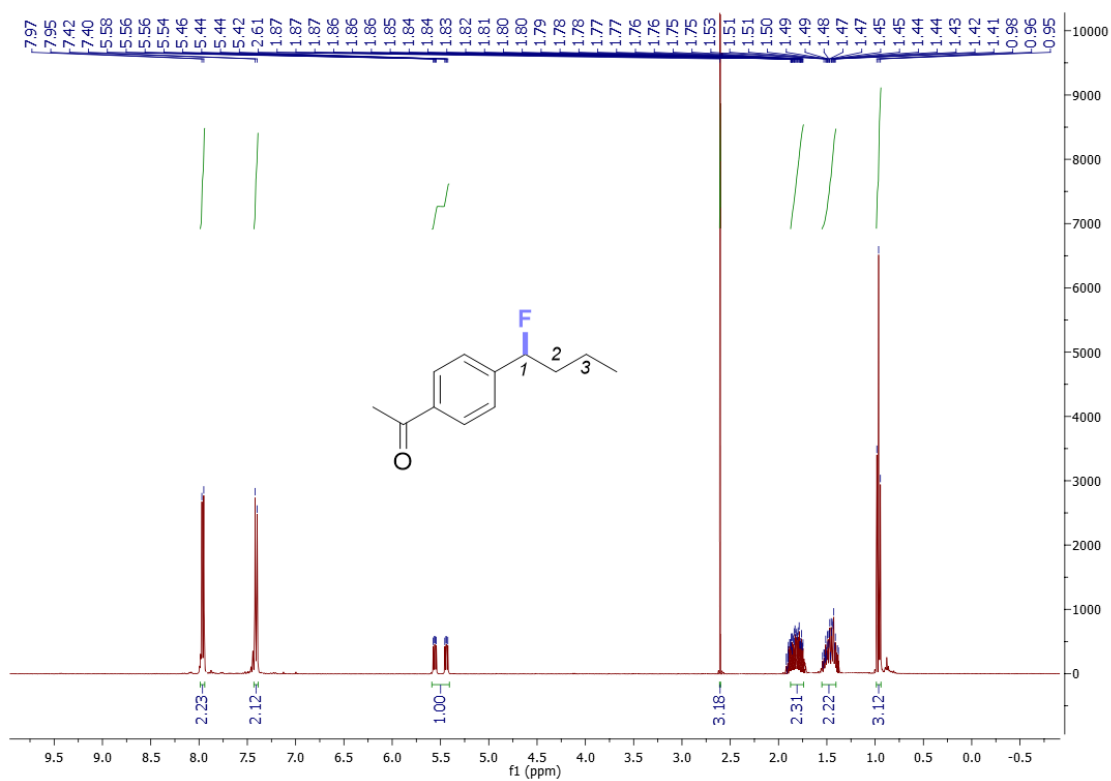

$^{13}\text{C}$  NMR of compound **2t** in  $\text{CDCl}_3$

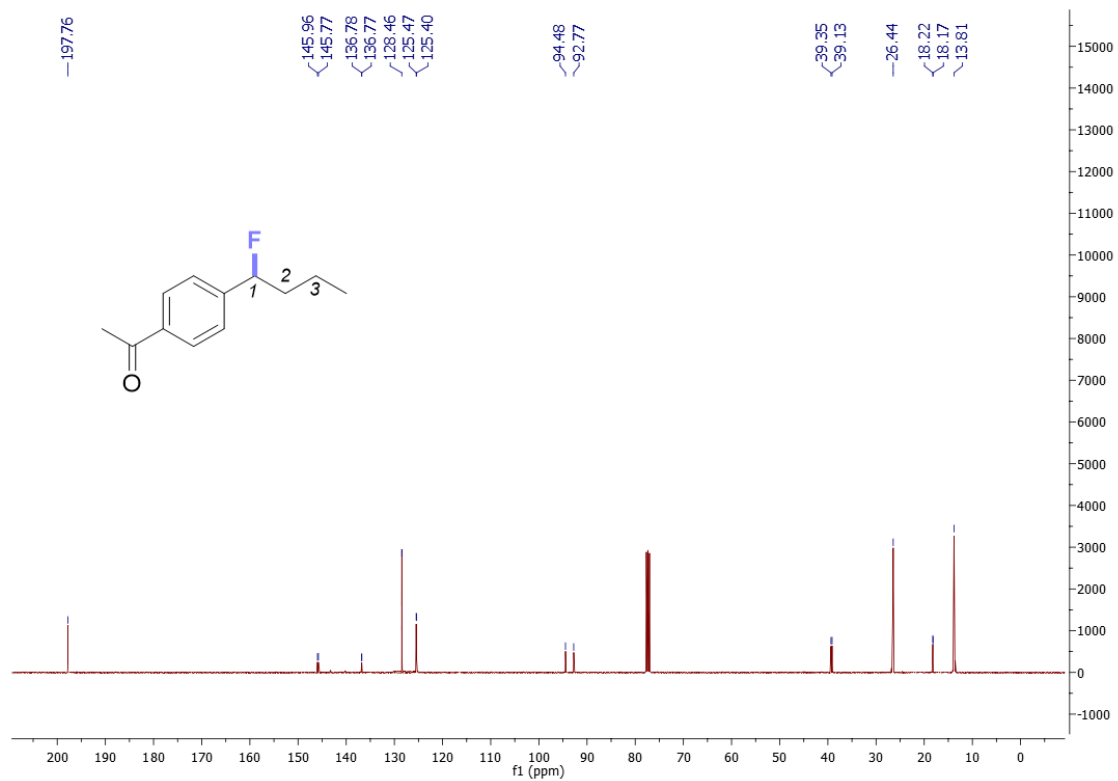

$^{19}\text{F}$  NMR of compound **2t** in  $\text{CDCl}_3$

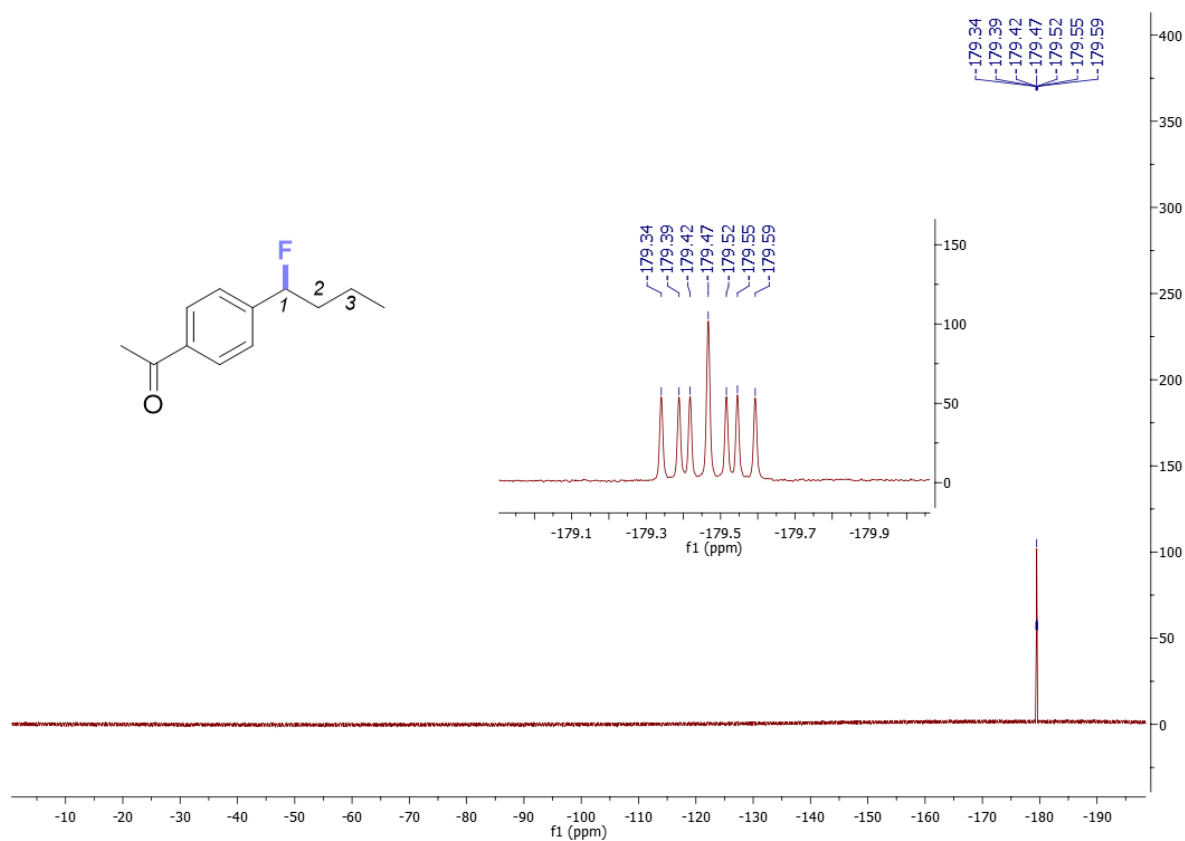

$^1\text{H}$  NMR of compound **2v** in  $\text{CDCl}_3$

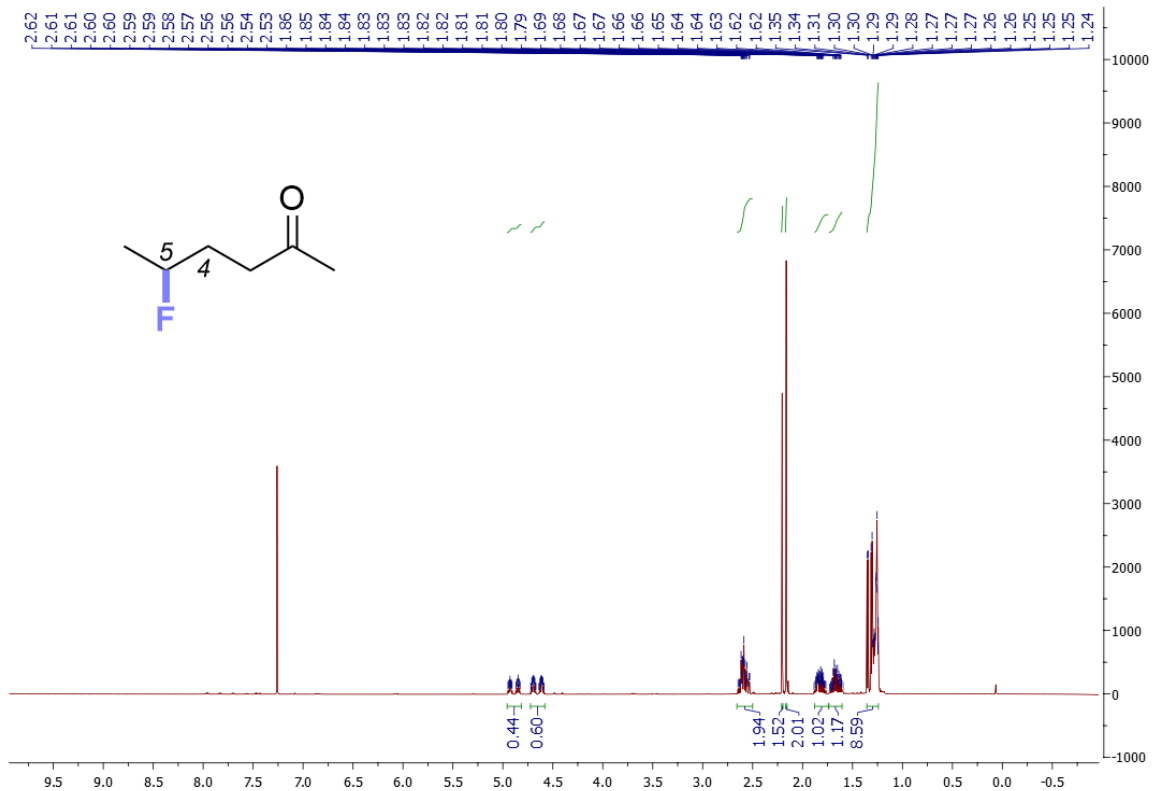

<sup>13</sup>C NMR of compound 2v in CDCl<sub>3</sub>

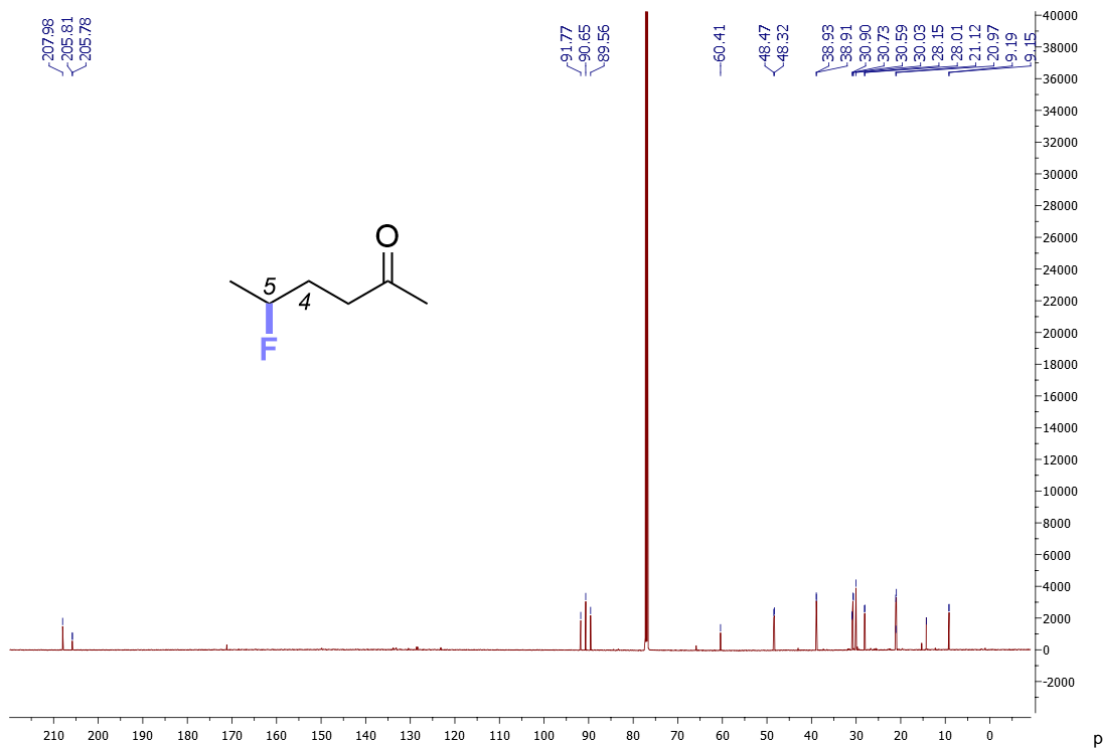

<sup>19</sup>F NMR of compound **2v** in CDCl<sub>3</sub>

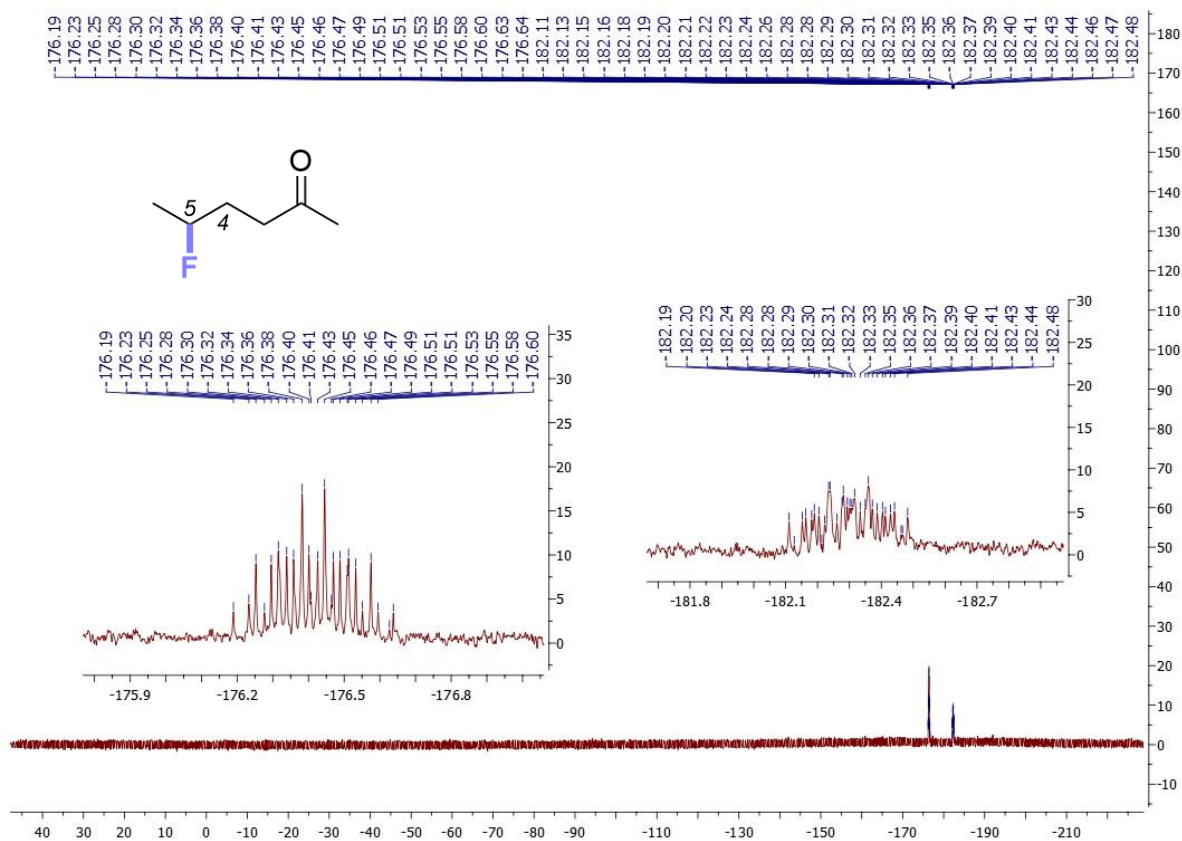

<sup>1</sup>H NMR of compound **2y** in CDCl<sub>3</sub>

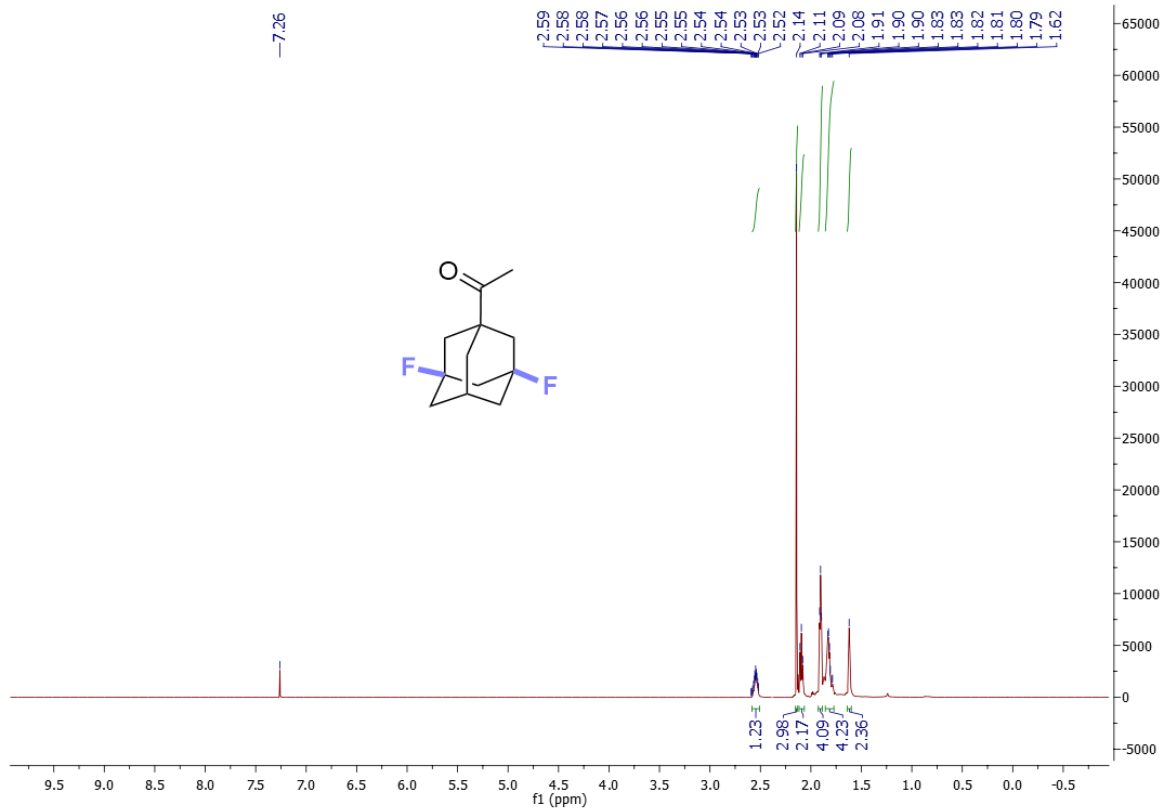

$^{13}\text{C}$  NMR of compound **2y** in  $\text{CDCl}_3$

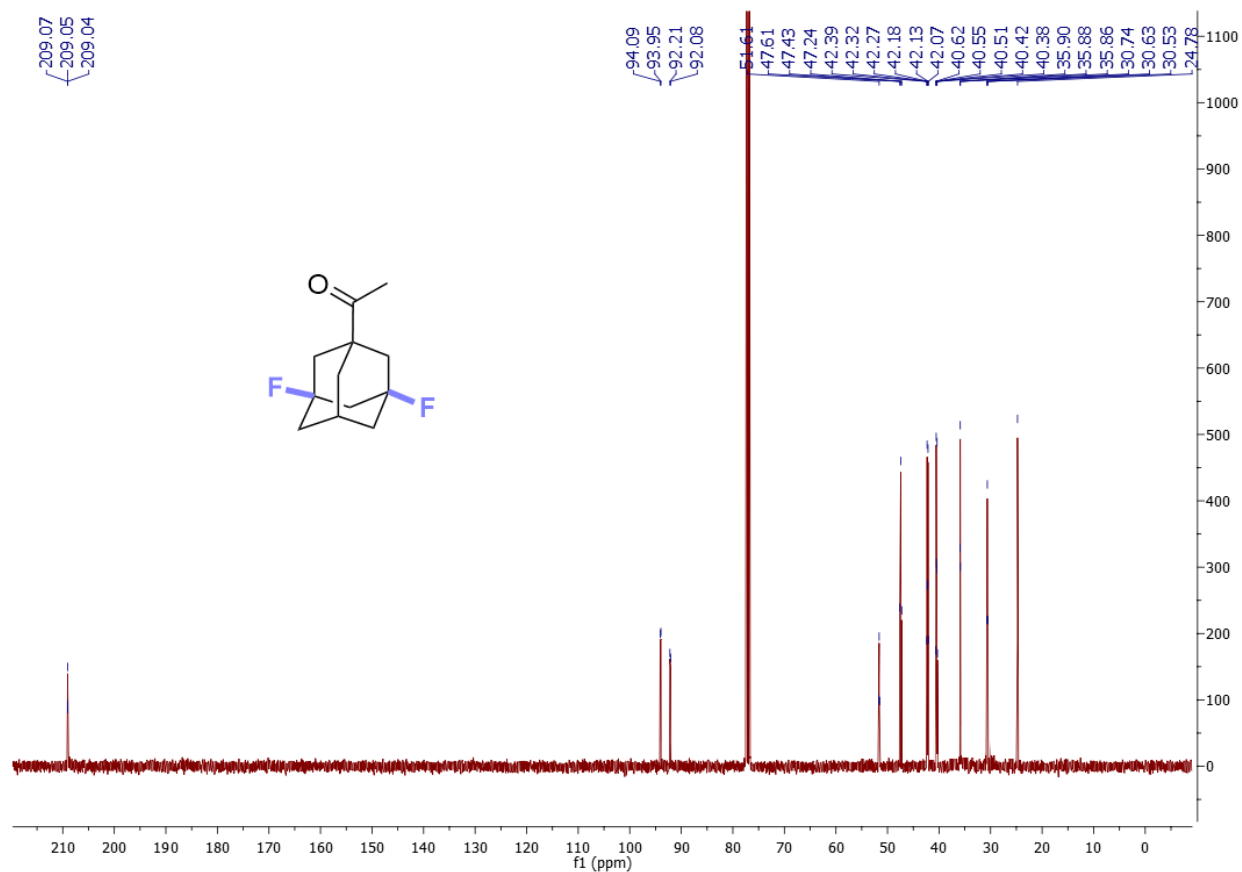

$^{19}\text{F}$  NMR of compound **2y** in  $\text{CDCl}_3$

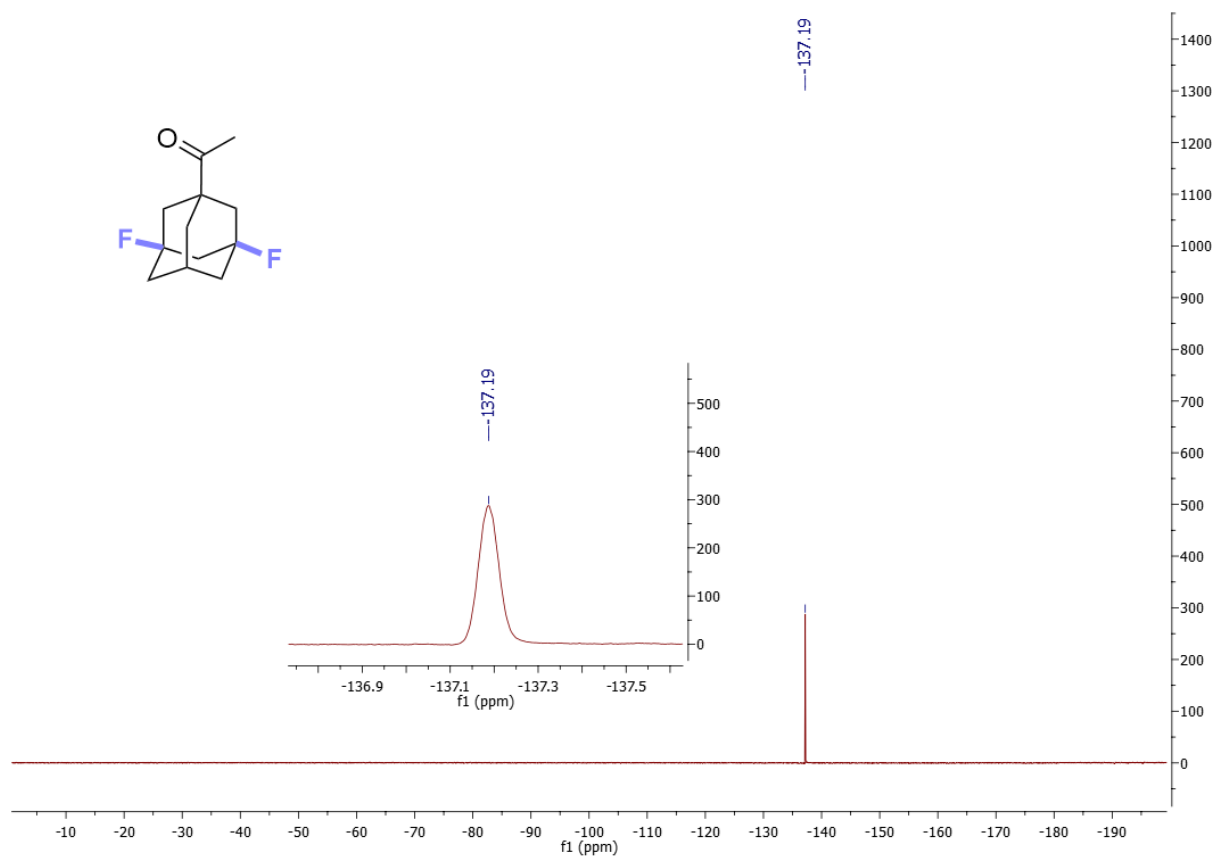

## 5 X-Ray Crystal Data and Experimental

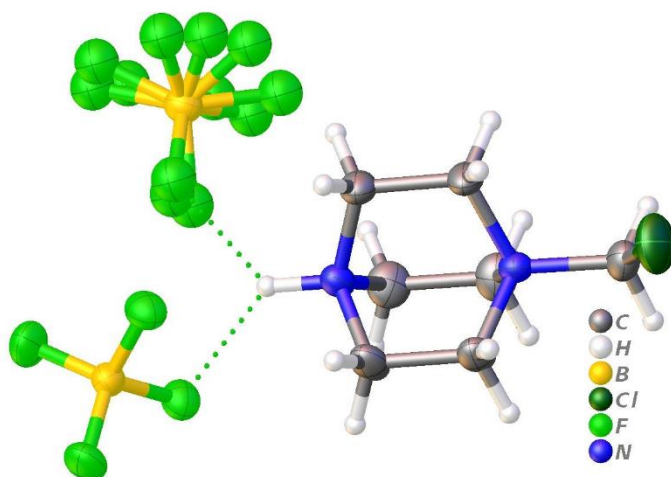

**Experimental.** Single clear colourless prism-shaped crystals of **H-TEDA(BF<sub>4</sub>)<sub>2</sub>** were used as supplied. A suitable crystal with dimensions  $0.27 \times 0.08 \times 0.06 \text{ mm}^3$  was selected and mounted on a MITIGEN holder oil on a XtaLAB Synergy R, DW system, HyPix-Arc 150 diffractometer. The crystal was kept at a steady  $T = 143.01(10) \text{ K}$  during data collection. The structure was solved with the ShelXT 2018/2 (Sheldrick, 2018) solution program using dual methods and by using Olex2 1.5-alpha (Dolomanov et al., 2009) as the graphical interface. The model was refined with ShelXL 2018/3 (Sheldrick, 2015) using full matrix least squares minimisation on  $F^2$ .

**Crystal Data.**  $\text{C}_7\text{H}_{15}\text{B}_2\text{ClF}_8\text{N}_2$ ,  $M_r = 336.23$ , orthorhombic, *Pbca* (No. 61),  $a = 13.1167(2) \text{ \AA}$ ,  $b = 12.7140(2) \text{ \AA}$ ,  $c = 15.6393(3) \text{ \AA}$ ,  $\alpha = \beta = \gamma = 90^\circ$ ,  $V = 2608.10(8) \text{ \AA}^3$ ,  $T = 143.01(10) \text{ K}$ ,  $Z = 8$ ,  $Z' = 1$ ,  $\mu(\text{Cu K}\alpha) = 3.463$ , 30229 reflections measured, 2683 unique ( $R_{\text{int}} = 0.0477$ ) which were used in all calculations. The final  $wR_2$  was 0.1740 (all data) and  $R_1$  was 0.0654 ( $I \geq 2 \sigma(I)$ ).

CCDC deposition number: 2291634.

| Compound                              | <b>H-TEDA(BF<sub>4</sub>)<sub>2</sub></b>                 |
|---------------------------------------|-----------------------------------------------------------|
| Formula                               | $\text{C}_7\text{H}_{15}\text{B}_2\text{ClF}_8\text{N}_2$ |
| $D_{\text{calc.}} / \text{g cm}^{-3}$ | 1.713                                                     |
| $\mu / \text{mm}^{-1}$                | 3.463                                                     |
| Formula Weight                        | 336.23                                                    |
| Colour                                | clear colourless                                          |
| Shape                                 | prism-shaped                                              |
| Size/ $\text{mm}^3$                   | $0.27 \times 0.08 \times 0.06$                            |
| $T / \text{K}$                        | 143.01(10)                                                |
| Crystal System                        | orthorhombic                                              |
| Space Group                           | <i>Pbca</i>                                               |
| $a / \text{Å}$                        | 13.1167(2)                                                |
| $b / \text{Å}$                        | 12.7140(2)                                                |
| $c / \text{Å}$                        | 15.6393(3)                                                |
| $\alpha / ^\circ$                     | 90                                                        |
| $\beta / ^\circ$                      | 90                                                        |
| $\gamma / ^\circ$                     | 90                                                        |
| $V / \text{Å}^3$                      | 2608.10(8)                                                |
| $Z$                                   | 8                                                         |
| $Z'$                                  | 1                                                         |
| Wavelength/ $\text{Å}$                | 1.54184                                                   |
| Radiation type                        | Cu $K\alpha$                                              |
| $\theta_{\text{min}} / ^\circ$        | 5.611                                                     |
| $\theta_{\text{max}} / ^\circ$        | 75.507                                                    |
| Measured Refl's.                      | 30229                                                     |
| Indep't Refl's                        | 2683                                                      |
| Refl's $I \geq 2 \sigma(I)$           | 2362                                                      |
| $R_{\text{int}}$                      | 0.0477                                                    |
| Parameters                            | 190                                                       |
| Restraints                            | 1                                                         |
| Largest Peak                          | 0.904                                                     |
| Deepest Hole                          | -0.522                                                    |
| GooF                                  | 1.053                                                     |
| $wR_2$ (all data)                     | 0.1740                                                    |
| $wR_2$                                | 0.1686                                                    |
| $R_1$ (all data)                      | 0.0719                                                    |
| $R_1$                                 | 0.0654                                                    |

**Table 1:** Fractional Atomic Coordinates ( $\times 10^4$ ) and Equivalent Isotropic Displacement Parameters ( $\text{\AA}^2 \times 10^3$ ) for **H-TEDA(BF<sub>4</sub>)<sub>2</sub>**.  $U_{eq}$  is defined as 1/3 of the trace of the orthogonalised  $U_{ij}$ .

| Atom            | x          | y          | z          | $U_{eq}$ |
|-----------------|------------|------------|------------|----------|
| Cl <sup>1</sup> | 6088.4(8)  | 882.4(7)   | 5305.8(7)  | 54.6(3)  |
| F <sup>5</sup>  | 6538.8(14) | 5242.3(14) | 8540.9(11) | 33.7(4)  |
| F <sup>6</sup>  | 8002.5(14) | 5257.1(15) | 7787.4(11) | 36.0(4)  |
| F <sup>7</sup>  | 8066.2(16) | 5127.7(15) | 9233.5(11) | 40.9(5)  |
| F <sup>8</sup>  | 7578.7(18) | 6668.9(14) | 8620.5(13) | 45.3(5)  |
| N <sup>1</sup>  | 6234.1(19) | 4238.9(18) | 6958.6(15) | 27.0(5)  |
| N <sup>2</sup>  | 5584.5(18) | 2650.8(18) | 6167.4(14) | 24.8(5)  |
| C <sup>1</sup>  | 6669(3)    | 4236(2)    | 6075.1(19) | 33.1(7)  |
| C <sup>3</sup>  | 4705(3)    | 3330(3)    | 6450(2)    | 38.2(7)  |
| C <sup>6</sup>  | 6171(3)    | 2308(2)    | 6947.2(19) | 32.8(7)  |
| C <sup>4</sup>  | 5105(3)    | 4288(3)    | 6922(2)    | 39.5(7)  |
| C <sup>5</sup>  | 6560(3)    | 3265(2)    | 7422(2)    | 38.1(8)  |
| C <sup>7</sup>  | 5138(3)    | 1715(2)    | 5710(2)    | 35.6(7)  |
| C <sup>2</sup>  | 6270(3)    | 3285(2)    | 5591.9(19) | 36.3(7)  |
| B <sup>1</sup>  | 7555(3)    | 5588(3)    | 8556(2)    | 27.7(7)  |
| B <sup>2</sup>  | 5919(3)    | 7098(3)    | 6284(2)    | 30.6(7)  |
| F <sup>2</sup>  | 6277(4)    | 6555(5)    | 6988(4)    | 44.7(5)  |
| F <sup>3</sup>  | 6030(4)    | 8163(3)    | 6526(3)    | 44.7(5)  |
| F <sup>1</sup>  | 6462(4)    | 6884(4)    | 5563(3)    | 44.7(5)  |
| F <sup>4</sup>  | 4920(3)    | 6861(4)    | 6195(3)    | 44.7(5)  |
| F <sup>1A</sup> | 6073(9)    | 6570(8)    | 5494(6)    | 44.7(5)  |
| F <sup>2A</sup> | 5972(9)    | 6459(11)   | 7033(8)    | 44.7(5)  |
| F <sup>4A</sup> | 4864(8)    | 7400(9)    | 6235(6)    | 44.7(5)  |
| F <sup>3A</sup> | 6299(9)    | 8092(9)    | 6268(7)    | 44.7(5)  |
| F <sup>4B</sup> | 5193(8)    | 6470(8)    | 5866(7)    | 44.7(5)  |
| F <sup>1B</sup> | 6744(9)    | 7220(9)    | 5721(7)    | 44.7(5)  |
| F <sup>3B</sup> | 5550(10)   | 8060(9)    | 6405(7)    | 44.7(5)  |
| F <sup>2B</sup> | 6513(10)   | 6480(12)   | 6837(9)    | 44.7(5)  |

**Table 2:** Anisotropic Displacement Parameters ( $\times 10^4$ ) for **H-TEDA(BF<sub>4</sub>)<sub>2</sub>**. The anisotropic displacement factor exponent takes the form:  $-2\pi^2[h^2a^{*2} \times U_{11} + \dots + 2hka^* \times b^* \times U_{12}]$

| Atom            | $U_{11}$ | $U_{22}$ | $U_{33}$ | $U_{23}$ | $U_{13}$  | $U_{12}$  |
|-----------------|----------|----------|----------|----------|-----------|-----------|
| Cl <sup>1</sup> | 61.0(6)  | 38.8(5)  | 63.9(6)  | -23.3(4) | -0.7(4)   | -0.3(4)   |
| F <sup>5</sup>  | 33.0(9)  | 37.1(10) | 31.2(9)  | -4.4(7)  | 3.5(7)    | -2.8(7)   |
| F <sup>6</sup>  | 35.7(10) | 43.5(10) | 28.9(9)  | -1.8(7)  | 4.5(7)    | -3.4(8)   |
| F <sup>7</sup>  | 51.7(12) | 41.9(10) | 29.1(9)  | 4.1(8)   | -13.5(8)  | -0.7(9)   |
| F <sup>8</sup>  | 63.3(13) | 25.9(9)  | 46.5(11) | -1.5(8)  | -5.7(10)  | -5.2(9)   |
| N <sup>1</sup>  | 34.7(13) | 24.5(12) | 22.0(11) | 0.1(9)   | -2.6(9)   | 1.2(10)   |
| N <sup>2</sup>  | 28.5(12) | 24.7(11) | 21.1(10) | 2.2(9)   | 0.5(9)    | -2.1(9)   |
| C <sup>1</sup>  | 41.2(17) | 33.1(15) | 25.0(14) | 0.1(12)  | 5.6(12)   | -8.3(13)  |
| C <sup>3</sup>  | 30.3(16) | 36.0(17) | 48.3(19) | -3.2(14) | -2.7(14)  | 5.0(13)   |
| C <sup>6</sup>  | 45.3(18) | 25.3(14) | 27.9(14) | 4.7(11)  | -8.3(13)  | 2.0(12)   |
| C <sup>4</sup>  | 37.2(17) | 37.1(17) | 44.2(18) | -6.2(14) | 6.0(14)   | 6.7(14)   |
| C <sup>5</sup>  | 58(2)    | 29.1(15) | 27.3(14) | 3.3(12)  | -14.4(14) | 3.0(14)   |
| C <sup>7</sup>  | 40.0(17) | 30.7(15) | 36.1(16) | 0.0(12)  | -7.1(13)  | -8.9(13)  |
| C <sup>2</sup>  | 49.8(19) | 35.5(16) | 23.6(14) | -1.5(12) | 8.7(13)   | -15.0(14) |
| B <sup>1</sup>  | 34.2(17) | 25.4(15) | 23.7(14) | -0.9(12) | -0.7(13)  | -3.1(13)  |
| B <sup>2</sup>  | 32.6(17) | 31.5(16) | 27.8(15) | 1.0(13)  | -0.5(13)  | 1.0(14)   |
| F <sup>2</sup>  | 48.9(14) | 42.9(10) | 42.4(10) | -1.8(9)  | -0.1(8)   | -2.8(10)  |
| F <sup>3</sup>  | 48.9(14) | 42.9(10) | 42.4(10) | -1.8(9)  | -0.1(8)   | -2.8(10)  |
| F <sup>1</sup>  | 48.9(14) | 42.9(10) | 42.4(10) | -1.8(9)  | -0.1(8)   | -2.8(10)  |
| F <sup>4</sup>  | 48.9(14) | 42.9(10) | 42.4(10) | -1.8(9)  | -0.1(8)   | -2.8(10)  |
| F <sup>1A</sup> | 48.9(14) | 42.9(10) | 42.4(10) | -1.8(9)  | -0.1(8)   | -2.8(10)  |

| Atom            | $U_{11}$ | $U_{22}$ | $U_{33}$ | $U_{23}$ | $U_{13}$ | $U_{12}$ |
|-----------------|----------|----------|----------|----------|----------|----------|
| F <sup>2A</sup> | 48.9(14) | 42.9(10) | 42.4(10) | -1.8(9)  | -0.1(8)  | -2.8(10) |
| F <sup>4A</sup> | 48.9(14) | 42.9(10) | 42.4(10) | -1.8(9)  | -0.1(8)  | -2.8(10) |
| F <sup>3A</sup> | 48.9(14) | 42.9(10) | 42.4(10) | -1.8(9)  | -0.1(8)  | -2.8(10) |
| F <sup>4B</sup> | 48.9(14) | 42.9(10) | 42.4(10) | -1.8(9)  | -0.1(8)  | -2.8(10) |
| F <sup>1B</sup> | 48.9(14) | 42.9(10) | 42.4(10) | -1.8(9)  | -0.1(8)  | -2.8(10) |
| F <sup>3B</sup> | 48.9(14) | 42.9(10) | 42.4(10) | -1.8(9)  | -0.1(8)  | -2.8(10) |
| F <sup>2B</sup> | 48.9(14) | 42.9(10) | 42.4(10) | -1.8(9)  | -0.1(8)  | -2.8(10) |

**Table 3:** Bond Lengths in Å for H-TEDA(BF<sub>4</sub>)<sub>2</sub>.

| Atom            | Atom           | Length/Å | Atom           | Atom            | Length/Å  |
|-----------------|----------------|----------|----------------|-----------------|-----------|
| Cl <sup>1</sup> | C <sup>7</sup> | 1.753(4) | C <sup>6</sup> | C <sup>5</sup>  | 1.514(4)  |
| F <sup>5</sup>  | B <sup>1</sup> | 1.404(4) | B <sup>2</sup> | F <sup>2</sup>  | 1.382(7)  |
| F <sup>6</sup>  | B <sup>1</sup> | 1.402(4) | B <sup>2</sup> | F <sup>3</sup>  | 1.414(6)  |
| F <sup>7</sup>  | B <sup>1</sup> | 1.384(4) | B <sup>2</sup> | F <sup>1</sup>  | 1.361(5)  |
| F <sup>8</sup>  | B <sup>1</sup> | 1.378(4) | B <sup>2</sup> | F <sup>4</sup>  | 1.351(5)  |
| N <sup>1</sup>  | C <sup>1</sup> | 1.495(4) | B <sup>2</sup> | F <sup>1A</sup> | 1.421(10) |
| N <sup>1</sup>  | C <sup>4</sup> | 1.484(4) | B <sup>2</sup> | F <sup>2A</sup> | 1.427(14) |
| N <sup>1</sup>  | C <sup>5</sup> | 1.497(4) | B <sup>2</sup> | F <sup>4A</sup> | 1.438(11) |
| N <sup>2</sup>  | C <sup>3</sup> | 1.507(4) | B <sup>2</sup> | F <sup>3A</sup> | 1.359(12) |
| N <sup>2</sup>  | C <sup>6</sup> | 1.506(3) | B <sup>2</sup> | F <sup>4B</sup> | 1.404(11) |
| N <sup>2</sup>  | C <sup>7</sup> | 1.507(4) | B <sup>2</sup> | F <sup>1B</sup> | 1.403(12) |
| N <sup>2</sup>  | C <sup>2</sup> | 1.506(4) | B <sup>2</sup> | F <sup>3B</sup> | 1.330(12) |
| C <sup>1</sup>  | C <sup>2</sup> | 1.519(4) | B <sup>2</sup> | F <sup>2B</sup> | 1.404(16) |
| C <sup>3</sup>  | C <sup>4</sup> | 1.518(5) |                |                 |           |

**Table 4:** Bond Angles in ° for H-TEDA(BF<sub>4</sub>)<sub>2</sub>.

| Atom           | Atom           | Atom            | Angle/°  | Atom            | Atom           | Atom            | Angle/°  |
|----------------|----------------|-----------------|----------|-----------------|----------------|-----------------|----------|
| C <sup>1</sup> | N <sup>1</sup> | C <sup>5</sup>  | 109.7(2) | F <sup>8</sup>  | B <sup>1</sup> | F <sup>6</sup>  | 110.6(3) |
| C <sup>4</sup> | N <sup>1</sup> | C <sup>1</sup>  | 110.2(2) | F <sup>8</sup>  | B <sup>1</sup> | F <sup>7</sup>  | 110.8(2) |
| C <sup>4</sup> | N <sup>1</sup> | C <sup>5</sup>  | 109.8(3) | F <sup>2</sup>  | B <sup>2</sup> | F <sup>3</sup>  | 103.3(4) |
| C <sup>6</sup> | N <sup>2</sup> | C <sup>3</sup>  | 108.6(2) | F <sup>1</sup>  | B <sup>2</sup> | F <sup>2</sup>  | 112.5(4) |
| C <sup>6</sup> | N <sup>2</sup> | C <sup>7</sup>  | 110.7(2) | F <sup>1</sup>  | B <sup>2</sup> | F <sup>3</sup>  | 111.0(4) |
| C <sup>7</sup> | N <sup>2</sup> | C <sup>3</sup>  | 107.1(2) | F <sup>4</sup>  | B <sup>2</sup> | F <sup>2</sup>  | 107.5(4) |
| C <sup>2</sup> | N <sup>2</sup> | C <sup>3</sup>  | 109.0(2) | F <sup>4</sup>  | B <sup>2</sup> | F <sup>3</sup>  | 109.9(4) |
| C <sup>2</sup> | N <sup>2</sup> | C <sup>6</sup>  | 109.5(2) | F <sup>4</sup>  | B <sup>2</sup> | F <sup>1</sup>  | 112.2(4) |
| C <sup>2</sup> | N <sup>2</sup> | C <sup>7</sup>  | 111.8(2) | F <sup>1A</sup> | B <sup>2</sup> | F <sup>2A</sup> | 116.0(7) |
| N <sup>1</sup> | C <sup>1</sup> | C <sup>2</sup>  | 109.3(2) | F <sup>1A</sup> | B <sup>2</sup> | F <sup>4A</sup> | 102.5(6) |
| N <sup>2</sup> | C <sup>3</sup> | C <sup>4</sup>  | 109.8(3) | F <sup>2A</sup> | B <sup>2</sup> | F <sup>4A</sup> | 104.0(6) |
| N <sup>2</sup> | C <sup>6</sup> | C <sup>5</sup>  | 109.7(2) | F <sup>3A</sup> | B <sup>2</sup> | F <sup>1A</sup> | 111.8(6) |
| N <sup>1</sup> | C <sup>4</sup> | C <sup>3</sup>  | 109.3(3) | F <sup>3A</sup> | B <sup>2</sup> | F <sup>2A</sup> | 121.8(8) |
| N <sup>1</sup> | C <sup>5</sup> | C <sup>6</sup>  | 109.4(2) | F <sup>3A</sup> | B <sup>2</sup> | F <sup>4A</sup> | 96.0(7)  |
| N <sup>2</sup> | C <sup>7</sup> | Cl <sup>1</sup> | 111.8(2) | F <sup>4B</sup> | B <sup>2</sup> | F <sup>2B</sup> | 110.2(8) |
| N <sup>2</sup> | C <sup>2</sup> | C <sup>1</sup>  | 109.5(2) | F <sup>1B</sup> | B <sup>2</sup> | F <sup>4B</sup> | 107.1(7) |
| F <sup>6</sup> | B <sup>1</sup> | F <sup>5</sup>  | 106.8(2) | F <sup>1B</sup> | B <sup>2</sup> | F <sup>2B</sup> | 91.2(7)  |
| F <sup>7</sup> | B <sup>1</sup> | F <sup>5</sup>  | 109.9(2) | F <sup>3B</sup> | B <sup>2</sup> | F <sup>4B</sup> | 110.1(7) |
| F <sup>7</sup> | B <sup>1</sup> | F <sup>6</sup>  | 109.1(3) | F <sup>3B</sup> | B <sup>2</sup> | F <sup>1B</sup> | 105.5(7) |
| F <sup>8</sup> | B <sup>1</sup> | F <sup>5</sup>  | 109.6(3) | F <sup>3B</sup> | B <sup>2</sup> | F <sup>2B</sup> | 128.9(9) |

**Table 5:** Torsion Angles in ° for H-TEDA(BF<sub>4</sub>)<sub>2</sub>.

| Atom           | Atom           | Atom           | Atom           | Angle/° |
|----------------|----------------|----------------|----------------|---------|
| N <sup>1</sup> | C <sup>1</sup> | C <sup>2</sup> | N <sup>2</sup> | -1.0(4) |
| N <sup>2</sup> | C <sup>3</sup> | C <sup>4</sup> | N <sup>1</sup> | -0.5(4) |
| N <sup>2</sup> | C <sup>6</sup> | C <sup>5</sup> | N <sup>1</sup> | -0.1(4) |



| Atom           | Atom           | Atom           | Atom            | Angle/°   |
|----------------|----------------|----------------|-----------------|-----------|
| C <sup>1</sup> | N <sup>1</sup> | C <sup>4</sup> | C <sup>3</sup>  | 60.7(3)   |
| C <sup>1</sup> | N <sup>1</sup> | C <sup>5</sup> | C <sup>6</sup>  | -60.4(3)  |
| C <sup>3</sup> | N <sup>2</sup> | C <sup>6</sup> | C <sup>5</sup>  | -59.4(3)  |
| C <sup>3</sup> | N <sup>2</sup> | C <sup>7</sup> | Cl <sup>1</sup> | 177.5(2)  |
| C <sup>3</sup> | N <sup>2</sup> | C <sup>2</sup> | C <sup>1</sup>  | 59.9(3)   |
| C <sup>6</sup> | N <sup>2</sup> | C <sup>3</sup> | C <sup>4</sup>  | 60.0(3)   |
| C <sup>6</sup> | N <sup>2</sup> | C <sup>7</sup> | Cl <sup>1</sup> | -64.2(3)  |
| C <sup>6</sup> | N <sup>2</sup> | C <sup>2</sup> | C <sup>1</sup>  | -58.8(3)  |
| C <sup>4</sup> | N <sup>1</sup> | C <sup>1</sup> | C <sup>2</sup>  | -59.9(3)  |
| C <sup>4</sup> | N <sup>1</sup> | C <sup>5</sup> | C <sup>6</sup>  | 60.8(3)   |
| C <sup>5</sup> | N <sup>1</sup> | C <sup>1</sup> | C <sup>2</sup>  | 61.0(3)   |
| C <sup>5</sup> | N <sup>1</sup> | C <sup>4</sup> | C <sup>3</sup>  | -60.2(3)  |
| C <sup>7</sup> | N <sup>2</sup> | C <sup>3</sup> | C <sup>4</sup>  | 179.7(3)  |
| C <sup>7</sup> | N <sup>2</sup> | C <sup>6</sup> | C <sup>5</sup>  | -176.7(3) |
| C <sup>7</sup> | N <sup>2</sup> | C <sup>2</sup> | C <sup>1</sup>  | 178.1(3)  |
| C <sup>2</sup> | N <sup>2</sup> | C <sup>3</sup> | C <sup>4</sup>  | -59.2(3)  |
| C <sup>2</sup> | N <sup>2</sup> | C <sup>6</sup> | C <sup>5</sup>  | 59.5(3)   |
| C <sup>2</sup> | N <sup>2</sup> | C <sup>7</sup> | Cl <sup>1</sup> | 58.2(3)   |

**Table 6:** Hydrogen Fractional Atomic Coordinates ( $\times 10^4$ ) and Equivalent Isotropic Displacement Parameters ( $\text{\AA}^2 \times 10^3$ ) for **H-TEDA(BF<sub>4</sub>)<sub>2</sub>**.  $U_{eq}$  is defined as 1/3 of the trace of the orthogonalised  $U_{ij}$ .

| Atom            | x       | y       | z       | $U_{eq}$ |
|-----------------|---------|---------|---------|----------|
| H <sup>1</sup>  | 6494.57 | 4868.54 | 7273.38 | 32       |
| H <sup>1A</sup> | 7422.53 | 4209.01 | 6103.87 | 40       |
| H <sup>1B</sup> | 6470.5  | 4888.76 | 5772.76 | 40       |
| H <sup>3A</sup> | 4249.61 | 2921.62 | 6829.84 | 46       |
| H <sup>3B</sup> | 4306.2  | 3556.15 | 5944.76 | 46       |
| H <sup>6A</sup> | 6752.86 | 1860.03 | 6773.3  | 39       |
| H <sup>6B</sup> | 5723.55 | 1889.2  | 7326.54 | 39       |
| H <sup>4A</sup> | 4888.91 | 4936.62 | 6621.58 | 47       |
| H <sup>4B</sup> | 4821.73 | 4305.58 | 7508.28 | 47       |
| H <sup>5A</sup> | 6282.01 | 3271.02 | 8010.65 | 46       |
| H <sup>5B</sup> | 7312.64 | 3240.29 | 7458.73 | 46       |
| H <sup>7A</sup> | 4703.21 | 1962.48 | 5233.6  | 43       |
| H <sup>7B</sup> | 4701.46 | 1314.67 | 6111.57 | 43       |
| H <sup>2A</sup> | 5885.04 | 3518.33 | 5081.47 | 44       |
| H <sup>2B</sup> | 6848.08 | 2845    | 5397.83 | 44       |

**Table 7:** Atomic Occupancies for all atoms that are not fully occupied in **H-TEDA(BF<sub>4</sub>)<sub>2</sub>**.

| Atom           | Occupancy | Atom            | Occupancy | Atom            | Occupancy | Atom            | Occupancy |
|----------------|-----------|-----------------|-----------|-----------------|-----------|-----------------|-----------|
| F <sup>2</sup> | 0.567(4)  | F <sup>4</sup>  | 0.567(4)  | F <sup>3A</sup> | 0.226(4)  | F <sup>2B</sup> | 0.206(4)  |
| F <sup>3</sup> | 0.567(4)  | F <sup>1A</sup> | 0.226(4)  | F <sup>4B</sup> | 0.206(4)  |                 |           |
| F <sup>1</sup> | 0.567(4)  | F <sup>2A</sup> | 0.226(4)  | F <sup>1B</sup> | 0.206(4)  |                 |           |
|                |           | F <sup>4A</sup> | 0.226(4)  | F <sup>3B</sup> | 0.206(4)  |                 |           |

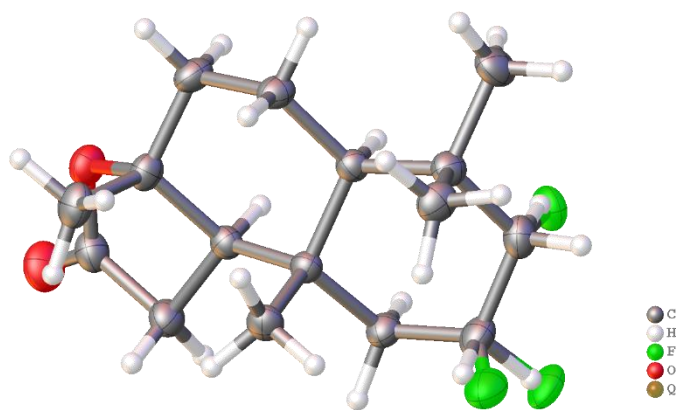

**Experimental.** Single clear colourless prism-shaped crystals of **2o** were used as supplied. A suitable crystal with dimensions  $0.14 \times 0.10 \times 0.08 \text{ mm}^3$  was selected and mounted on a MITIGEN holder inert oil on a XtaLAB Synergy R, DW system, HyPix-Arc 150 diffractometer. The crystal was kept at a steady  $T = 123.00(10) \text{ K}$  during data collection. The structure was solved with the ShelXT 2018/2 (Sheldrick, 2018) solution program using iterative methods and by using Olex2 1.5-alpha (Dolomanov et al., 2009) as the graphical interface. The model was refined with olex2.refine 1.5-alpha (Bourhis et al., 2015) using full matrix least squares minimisation on  $F^2$ .

**Crystal Data.**  $\text{C}_{16}\text{H}_{25.05}\text{F}_{0.95}\text{O}_2$ ,  $M_r = 267.385$ , orthorhombic,  $P2_12_12_1$  (No. 19),  $a = 5.9658(1) \text{ \AA}$ ,  $b = 13.5775(1) \text{ \AA}$ ,  $c = 17.6402(1) \text{ \AA}$ ,  $\alpha = \beta = \gamma = 90^\circ$ ,  $V = 1428.87(3) \text{ \AA}^3$ ,  $T = 123.00(10) \text{ K}$ ,  $Z = 4$ ,  $Z' = 1$ ,  $\mu(\text{Cu K}\alpha) = 0.709$ , 26733 reflections measured, 2919 unique ( $R_{\text{int}} = 0.0229$ ) which were used in all calculations. The final  $wR_2$  was 0.0707 (all data) and  $R_1$  was 0.0279 ( $I \geq 2 \sigma(I)$ ).

CCDC deposition number: 2381200.

| Compound                              | <b>2o</b>                                                |
|---------------------------------------|----------------------------------------------------------|
| Formula                               | $\text{C}_{16}\text{H}_{25.05}\text{F}_{0.95}\text{O}_2$ |
| $D_{\text{calc.}} / \text{g cm}^{-3}$ | 1.243                                                    |
| $\mu / \text{mm}^{-1}$                | 0.709                                                    |
| Formula Weight                        | 267.385                                                  |
| Colour                                | clear colourless                                         |
| Shape                                 | prism-shaped                                             |
| Size/ $\text{mm}^3$                   | $0.14 \times 0.10 \times 0.08$                           |
| $T / \text{K}$                        | 123.00(10)                                               |
| Crystal System                        | orthorhombic                                             |
| Flack Parameter                       | -0.14(4)                                                 |
| Hooft Parameter                       | -0.14(4)                                                 |
| Space Group                           | $P2_12_12_1$                                             |
| $a / \text{Å}$                        | 5.9658(1)                                                |
| $b / \text{Å}$                        | 13.5775(1)                                               |
| $c / \text{Å}$                        | 17.6402(1)                                               |
| $\alpha / ^\circ$                     | 90                                                       |
| $\beta / ^\circ$                      | 90                                                       |
| $\gamma / ^\circ$                     | 90                                                       |
| $V / \text{Å}^3$                      | 1428.87(3)                                               |
| $Z$                                   | 4                                                        |
| $Z'$                                  | 1                                                        |
| Wavelength/ $\text{Å}$                | 1.54184                                                  |
| Radiation type                        | Cu $K\alpha$                                             |
| $\Theta_{\text{min}} / ^\circ$        | 4.11                                                     |
| $\Theta_{\text{max}} / ^\circ$        | 75.01                                                    |
| Measured Refl's.                      | 26733                                                    |
| Indep't Refl's                        | 2919                                                     |
| Refl's $I \geq 2 \sigma(I)$           | 2813                                                     |
| $R_{\text{int}}$                      | 0.0229                                                   |
| Parameters                            | 284                                                      |
| Restraints                            | 0                                                        |
| Largest Peak                          | 0.1599                                                   |
| Deepest Hole                          | -0.1812                                                  |
| GooF                                  | 1.0738                                                   |
| $wR_2$ (all data)                     | 0.0707                                                   |
| $wR_2$                                | 0.0698                                                   |
| $R_1$ (all data)                      | 0.0293                                                   |
| $R_1$                                 | 0.0279                                                   |

**Table 8:** Fractional Atomic Coordinates ( $\times 10^4$ ) and Equivalent Isotropic Displacement Parameters ( $\text{\AA}^2 \times 10^3$ ) for **2o**.  $U_{eq}$  is defined as 1/3 of the trace of the orthogonalised  $U_{ij}$ .

| Atom | x          | y          | z         | $U_{eq}$ |
|------|------------|------------|-----------|----------|
| O1   | 1783.6(15) | 3665.7(6)  | 8036.0(5) | 30.0(2)  |
| O2   | 563.6(17)  | 2117.4(7)  | 8151.0(5) | 41.0(3)  |
| F1   | 3959(2)    | 3316.9(8)  | 4102.2(6) | 38.5(4)  |
| C9   | 4608.7(19) | 3968.6(8)  | 6144.9(6) | 22.1(2)  |
| C8   | 3865(2)    | 5063.4(8)  | 6029.9(6) | 22.7(2)  |
| C1   | 1673(2)    | 2709.8(9)  | 7812.6(7) | 30.4(3)  |
| C3   | 3159(2)    | 3621.1(8)  | 6813.2(6) | 22.5(2)  |
| C7   | 4141(2)    | 5673.9(9)  | 6757.8(7) | 27.3(3)  |
| C10  | 3930(2)    | 3376.1(9)  | 5437.5(7) | 26.8(2)  |
| C4   | 3440(2)    | 4190.1(9)  | 7558.8(6) | 25.6(2)  |
| C13  | 4741(2)    | 5564.5(8)  | 5294.9(7) | 26.4(3)  |
| C14  | 7127(2)    | 3817.3(10) | 6298.7(7) | 27.9(3)  |
| C2   | 3043(2)    | 2560.6(9)  | 7093.0(7) | 29.2(3)  |
| C11  | 4818(2)    | 3842.7(10) | 4713.4(7) | 31.6(3)  |
| C6   | 2776(2)    | 5254.7(9)  | 7428.6(7) | 29.1(3)  |
| C15  | 7273(2)    | 5762.5(10) | 5280.2(7) | 31.9(3)  |
| C12  | 4077(2)    | 4900.3(9)  | 4623.5(7) | 31.0(3)  |
| C5   | 5656(2)    | 4110.1(11) | 7989.8(7) | 34.1(3)  |
| C16  | 3556(3)    | 6560.2(10) | 5185.3(8) | 36.3(3)  |
| F2   | 1764(6)    | 4764(3)    | 4495(2)   | 34.3(13) |
| F3   | 6620(30)   | 3727(7)    | 4513(6)   | 42(4)    |

**Table 9:** Anisotropic Displacement Parameters ( $\times 10^4$ ) for **2o**. The anisotropic displacement factor exponent takes the form:  $-2\pi^2 [h^2 a^{*2} \times U_{11} + \dots + 2hka^* \times b^* \times U_{12}]$

| Atom | $U_{11}$ | $U_{22}$ | $U_{33}$ | $U_{23}$ | $U_{13}$ | $U_{12}$ |
|------|----------|----------|----------|----------|----------|----------|
| O1   | 32.3(5)  | 32.8(4)  | 24.9(4)  | -4.4(4)  | 5.3(4)   | 1.9(4)   |
| O2   | 46.0(6)  | 40.0(5)  | 37.1(5)  | -11.0(5) | 4.2(4)   | 9.6(4)   |
| F1   | 60.4(8)  | 32.9(6)  | 22.3(6)  | -10.0(6) | -0.7(5)  | -8.6(4)  |
| C9   | 21.5(5)  | 22.8(5)  | 21.8(5)  | 1.5(4)   | -0.5(4)  | -0.5(4)  |
| C8   | 22.3(5)  | 22.8(5)  | 23.1(5)  | 0.6(4)   | 1.0(4)   | 0.4(4)   |
| C1   | 33.3(7)  | 30.5(6)  | 27.5(6)  | -2.5(5)  | -2.7(5)  | 5.6(5)   |
| C3   | 21.8(5)  | 22.7(5)  | 23.1(5)  | 0.1(5)   | -1.8(4)  | 0.9(4)   |
| C7   | 31.9(6)  | 22.0(5)  | 28.1(6)  | -1.5(5)  | 4.9(5)   | -1.9(5)  |
| C10  | 32.8(6)  | 23.7(5)  | 24.1(5)  | -1.1(5)  | -0.4(5)  | -2.0(4)  |
| C4   | 25.2(6)  | 29.7(6)  | 21.9(5)  | -2.8(5)  | 3.5(4)   | 0.3(5)   |
| C13  | 29.4(6)  | 23.4(6)  | 26.5(6)  | -0.5(4)  | 2.6(5)   | 2.7(5)   |
| C14  | 22.9(5)  | 31.8(6)  | 29.0(6)  | 4.0(5)   | 1.0(5)   | 1.0(5)   |
| C2   | 35.8(7)  | 24.7(6)  | 27.2(6)  | -1.8(5)  | 0.8(5)   | 3.1(5)   |
| C11  | 40.3(7)  | 31.5(6)  | 23.0(6)  | -4.3(5)  | 0.9(6)   | -4.6(5)  |
| C6   | 34.1(7)  | 26.5(6)  | 26.5(6)  | -1.4(5)  | 6.8(5)   | -4.8(5)  |
| C15  | 32.7(7)  | 32.0(6)  | 31.0(6)  | -5.8(5)  | 6.0(5)   | -0.0(6)  |
| C12  | 34.1(6)  | 34.9(7)  | 24.2(6)  | -3.4(5)  | -1.5(5)  | 4.3(5)   |
| C5   | 33.7(7)  | 43.5(7)  | 25.1(6)  | -4.7(6)  | -4.8(5)  | -0.9(6)  |
| C16  | 43.6(8)  | 27.9(6)  | 37.4(7)  | 4.4(6)   | 5.5(6)   | 9.4(5)   |
| F2   | 31(2)    | 41(2)    | 31(2)    | 2.0(16)  | -9.1(15) | 4.4(15)  |
| F3   | 61(8)    | 30(5)    | 35(6)    | -1(5)    | 2(6)     | -5(4)    |

**Table 10:** Bond Lengths in Å for **2o**.

| Atom | Atom | Length/Å   | Atom | Atom | Length/Å   |
|------|------|------------|------|------|------------|
| O1   | C1   | 1.3580(16) | C3   | C2   | 1.5237(15) |
| O1   | C4   | 1.4808(14) | C7   | C6   | 1.5451(17) |
| O2   | C1   | 1.2007(15) | C10  | C11  | 1.5210(17) |
| F1   | C11  | 1.3911(17) | C4   | C6   | 1.5162(17) |
| C9   | C8   | 1.5643(15) | C4   | C5   | 1.5289(17) |
| C9   | C3   | 1.5363(16) | C13  | C15  | 1.5346(18) |
| C9   | C10  | 1.5389(16) | C13  | C12  | 1.5404(17) |
| C9   | C14  | 1.5407(16) | C13  | C16  | 1.5378(17) |
| C8   | C7   | 1.5372(16) | C11  | C12  | 1.5109(18) |
| C8   | C13  | 1.5548(16) | C11  | F3   | 1.141(18)  |
| C1   | C2   | 1.5234(17) | C12  | F2   | 1.411(4)   |
| C3   | C4   | 1.5346(15) |      |      |            |

**Table 11:** Bond Angles in ° for **2o**.

| Atom | Atom | Atom | Angle/°    | Atom | Atom | Atom | Angle/°    |
|------|------|------|------------|------|------|------|------------|
| C4   | O1   | C1   | 109.08(9)  | C5   | C4   | O1   | 105.08(9)  |
| C3   | C9   | C8   | 103.40(9)  | C5   | C4   | C3   | 119.02(10) |
| C10  | C9   | C8   | 108.48(9)  | C5   | C4   | C6   | 111.66(11) |
| C10  | C9   | C3   | 108.28(9)  | C15  | C13  | C8   | 114.94(10) |
| C14  | C9   | C8   | 115.22(10) | C12  | C13  | C8   | 107.37(9)  |
| C14  | C9   | C3   | 111.89(9)  | C12  | C13  | C15  | 110.05(10) |
| C14  | C9   | C10  | 109.24(10) | C16  | C13  | C8   | 109.57(10) |
| C7   | C8   | C9   | 111.95(9)  | C16  | C13  | C15  | 107.24(11) |
| C13  | C8   | C9   | 115.38(9)  | C16  | C13  | C12  | 107.44(10) |
| C13  | C8   | C7   | 115.13(9)  | C3   | C2   | C1   | 99.71(10)  |
| O2   | C1   | O1   | 121.52(12) | C10  | C11  | F1   | 107.98(11) |
| C2   | C1   | O1   | 110.06(10) | C12  | C11  | F1   | 107.36(11) |
| C2   | C1   | O2   | 128.39(12) | C12  | C11  | C10  | 112.47(11) |
| C4   | C3   | C9   | 116.20(10) | F3   | C11  | F1   | 92.1(6)    |
| C2   | C3   | C9   | 124.35(10) | F3   | C11  | C10  | 122.1(6)   |
| C2   | C3   | C4   | 101.72(9)  | F3   | C11  | C12  | 111.9(5)   |
| C6   | C7   | C8   | 112.62(10) | C4   | C6   | C7   | 109.24(10) |
| C11  | C10  | C9   | 111.81(10) | C11  | C12  | C13  | 113.60(10) |
| C3   | C4   | O1   | 99.92(9)   | F2   | C12  | C13  | 116.89(19) |
| C6   | C4   | O1   | 111.72(10) | F2   | C12  | C11  | 100.27(19) |
| C6   | C4   | C3   | 108.76(9)  |      |      |      |            |

**Table 12:** Torsion Angles in ° for **2o**.

| Atom | Atom | Atom | Atom | Angle/°     |
|------|------|------|------|-------------|
| O1   | C1   | C2   | C3   | -20.15(11)  |
| O1   | C4   | C3   | C9   | 178.75(8)   |
| O1   | C4   | C3   | C2   | -43.14(10)  |
| O1   | C4   | C6   | C7   | -163.83(10) |
| O2   | C1   | C2   | C3   | 157.62(16)  |
| F1   | C11  | C10  | C9   | -174.52(11) |
| F1   | C11  | C12  | C13  | 175.31(11)  |
| F1   | C11  | C12  | F2   | 49.81(19)   |
| C9   | C8   | C7   | C6   | -58.79(11)  |
| C9   | C8   | C13  | C15  | -69.18(11)  |
| C9   | C8   | C13  | C12  | 53.61(11)   |
| C9   | C8   | C13  | C16  | 170.01(11)  |
| C9   | C3   | C4   | C6   | 61.62(11)   |
| C9   | C3   | C4   | C5   | -67.73(11)  |
| C9   | C3   | C2   | C1   | 171.83(13)  |
| C9   | C10  | C11  | C12  | -56.24(12)  |

| Atom | Atom | Atom | Atom | Angle/°    |
|------|------|------|------|------------|
| C9   | C10  | C11  | F3   | 81.1(6)    |
| C8   | C7   | C6   | C4   | 56.08(11)  |
| C8   | C13  | C12  | C11  | -53.14(11) |
| C8   | C13  | C12  | F2   | 62.95(19)  |
| C1   | C2   | C3   | C4   | 38.36(10)  |
| C3   | C4   | C6   | C7   | -54.50(11) |
| C7   | C6   | C4   | C5   | 78.82(11)  |
| C10  | C11  | C12  | C13  | 56.68(12)  |
| C10  | C11  | C12  | F2   | -68.83(18) |
| C13  | C12  | C11  | F3   | -85.1(6)   |

**Table 13:** Hydrogen Fractional Atomic Coordinates ( $\times 10^4$ ) and Equivalent Isotropic Displacement Parameters ( $\text{\AA}^2 \times 10^3$ ) for **2o**.  $U_{eq}$  is defined as 1/3 of the trace of the orthogonalised  $U_{ij}$ .

| Atom | x        | y          | z          | $U_{eq}$ |
|------|----------|------------|------------|----------|
| H8   | 2180(20) | 5027(10)   | 5930(7)    | 21(3)    |
| H3   | 1600(20) | 3770(10)   | 6658(7)    | 22(3)    |
| H7a  | 5810(20) | 5710(10)   | 6896(8)    | 26(3)    |
| H7b  | 3620(30) | 6365(11)   | 6672(8)    | 32(4)    |
| H10a | 4490(20) | 2661(10)   | 5475(7)    | 25(3)    |
| H10b | 2140(20) | 3316(9)    | 5386(7)    | 14(3)    |
| H14a | 8010(30) | 3731(11)   | 5829(9)    | 36(4)    |
| H14b | 7790(30) | 4380(12)   | 6574(9)    | 36(4)    |
| H14c | 7370(30) | 3209(11)   | 6600(9)    | 37(4)    |
| H2a  | 4480(30) | 2288(12)   | 7238(9)    | 38(4)    |
| H2b  | 2250(30) | 2084(11)   | 6751(8)    | 36(4)    |
| H11a | 6650(50) | 3813.9(13) | 4717.8(7)  | 37.9(3)  |
| H11b | 4233(16) | 3417(12)   | 4228(14)   | 37.9(3)  |
| H6a  | 3030(30) | 5658(11)   | 7889(8)    | 28(3)    |
| H6b  | 1100(30) | 5282(11)   | 7305(8)    | 30(4)    |
| H15a | 7730(30) | 6143(12)   | 5747(9)    | 42(4)    |
| H15b | 8250(30) | 5158(12)   | 5221(9)    | 44(4)    |
| H15c | 7650(30) | 6145(14)   | 4813(10)   | 51(5)    |
| H12a | 2380(20) | 4916.9(10) | 4563.3(11) | 37.3(3)  |
| H12  | 4763(9)  | 5178(4)    | 4141(7)    | 30(4)    |
| H5a  | 5380(30) | 4361(12)   | 8506(10)   | 46(5)    |
| H5b  | 6260(30) | 3419(12)   | 8001(9)    | 39(4)    |
| H5c  | 6830(30) | 4540(11)   | 7771(8)    | 32(4)    |
| H16a | 1900(30) | 6504(11)   | 5258(9)    | 37(4)    |
| H16b | 4140(30) | 7064(13)   | 5542(9)    | 46(5)    |
| H16c | 3850(30) | 6812(12)   | 4675(10)   | 45(4)    |

**Table 14:** Atomic Occupancies for all atoms that are not fully occupied in **2o**.

| Atom | Occupancy |
|------|-----------|
| F1   | 0.660(4)  |
| H11a | 0.921(4)  |
| H11b | 0.340(4)  |
| H12a | 0.793(3)  |
| F2   | 0.207(3)  |
| F3   | 0.079(4)  |

## 6 References

1. S. Yakubov, W. J. Stockerl, X. Tian, A. Shahin, M. J. P. Mandigma, R. M. Gschwind and J. P. Barham, *Chem. Sci.*, 2022, **13**, 14041.
2. Selected examples: (a) C. W. Kee, K. F. Chin, M. W. Wong and C. H. Tan, *Chem. Commun.*, 2014, **50**, 8211; (b) J. B. Xia, C. Zhu and C. Chen, *Chem. Commun.*, 2014, **50**, 11701; (c) S. Bloom, J. L. Knippel and T. Lectka, *Chem. Sci.*, 2014, **5**, 1175; (d) J. B. Xia, Y. Ma and C. Chen, *Org. Chem. Front.*, 2014, **1**, 468.
3. R. S., Sreepurumbuduru, Z. M., Abid, K. M., Claunch, H. H., Chen, S. M., McGillivray and E. E. Simanek, *RSC Adv.*, 2016, **6**, 8806.
4. Y. F. Liang and N. Jiao, *Angew. Chem., Int. Ed.*, 2014, **53**, 548.
5. S. Ikonen, Nonappa, A. Valkonen, R. Juvonen, H. Salo and E. Kolehmainen, *Org. Biomol. Chem.*, 2010, **8**, 2784.
6. Y. Amaoka, M. Nagatomo and M. Inoue, *Org. Lett.*, 2013, **15**, 2160.
7. A. M. Hua, D. N. Mai, R. Martinez and R. D. Baxter, *Org. Lett.*, 2017, **19**, 2949.
